# Supplementary material for: Predictive Sequence Analysis of the Candidatus Liberibacter asiaticus Proteome
Source: PubMed Central journal article supplement (PMC3399792; doi:10.1371/journal.pone.0041071), 2012-07-18
Supplement: pone.0041071.s001.pdf [file pone.0041071.s001.pdf]

Table S1 Function annotations of all *Ca. L. asiaticus* proteins

| NCBI_gi   | SEED_id         | NCBI_annotaion                                                     | SEED_annotation                                                                                  | Curated_functon_prediction                                                                          | Comments                                           |
|-----------|-----------------|--------------------------------------------------------------------|--------------------------------------------------------------------------------------------------|-----------------------------------------------------------------------------------------------------|----------------------------------------------------|
| 254780122 | 537021.9.peg.1  | hypothetical protein                                               | hypothetical protein                                                                             | unknown                                                                                             |                                                    |
| 254780123 | 537021.9.peg.2  | hypothetical protein                                               | hypothetical protein                                                                             | unknown                                                                                             |                                                    |
| 254780124 | 537021.9.peg.3  | hypothetical protein                                               | Phage protein                                                                                    | endo/exonuclease                                                                                    |                                                    |
| 254780125 | 537021.9.peg.4  | prophage antirepressor                                             | Phage antirepressor protein                                                                      | prophage antirepressor                                                                              |                                                    |
| 254780126 | 537021.9.peg.5  | hypothetical protein                                               | unknown                                                                                          | phage protein, may related to DNA binding                                                           |                                                    |
| 254780127 | 537021.9.peg.6  | putative DNA polymerase from bacteriophage origin                  | DNA polymerase I (EC 2.7.7.7)                                                                    | prophage DNA polymerase I (EC 2.7.7.7)                                                              |                                                    |
| 254780128 | 537021.9.peg.7  | VRR-NUC domain-containing protein                                  | hypothetical protein                                                                             | restriction endonuclease                                                                            |                                                    |
| 254780129 | 537021.9.peg.8  | hypothetical protein                                               | DNA helicase, phage-associated                                                                   | prohage DNA/RNA helicase                                                                            | 1/2 of a protein                                   |
| 254780130 | 537021.9.peg.9  | hypothetical protein                                               | DNA helicase, phage-associated                                                                   | prohage DNA/RNA helicase                                                                            | 1/2 of a protein                                   |
| 254780131 | 537021.9.peg.10 | DNA ligase, NAD-dependent                                          | DNA ligase, NAD-dependent                                                                        | NAD-dependant DNA ligase                                                                            |                                                    |
| 254780132 | 537021.9.peg.11 | guanylate kinase                                                   | Guanylate kinase (EC 2.7.4.8)                                                                    | guanylate kinase (EC 2.7.4.8)                                                                       |                                                    |
| 254780133 | N/A             | hypothetical protein                                               | N/A                                                                                              | unknown                                                                                             |                                                    |
| 254780134 | 537021.9.peg.12 | phage-related integrase/recombinase                                | integrase                                                                                        | phage integrase                                                                                     |                                                    |
| 254780135 | 537021.9.peg.13 | hypothetical protein                                               | hypothetical protein                                                                             | unknown                                                                                             | has signal peptide                                 |
| 254780136 | 537021.9.peg.14 | ribonucleotide-diphosphate reductase subunit beta                  | Ribonucleotide reductase of class Ia (aerobic), beta subunit (EC 1.17.4.1)                       | ribonucleotide-diphosphate reductase subunit beta (EC 1.17.4.1)                                     | this is just part of the protein,                  |
| 254780137 | 537021.9.peg.16 | malic enzyme                                                       | NADP-dependent malic enzyme (EC 1.1.1.40)                                                        | malic enzyme (EC 1.1.1.40)                                                                          |                                                    |
| 254780138 | 537021.9.peg.17 | ABC transporter                                                    | ABC-type transport system involved in resistance to organic solvents, permease component USSDB6A | ABC-type import for membrane lipid (from outer membrane to inner membrane), transmembrane component | transmembrane protein                              |
| 254780139 | 537021.9.peg.18 | putative ATP-binding component of ABC transporter                  | probable ABC transporter, ATP-binding protein                                                    | ABC-type import for membrane lipid (from outer membrane to inner membrane), ATPase component        |                                                    |
| 254780140 | 537021.9.peg.19 | putative ABC transporter, substrate-binding protein                | putative solute-binding component of ABC transporter                                             | ABC-type import for membrane lipid (from outer membrane to inner membrane), auxiliary component     | transmembrane protein                              |
| 254780141 | 537021.9.peg.20 | putative ABC transporter protein                                   | hypothetical protein                                                                             | ABC-type import for membrane lipid (from outer membrane to inner membrane), auxiliary component     | has signal peptide                                 |
| 254780142 | 537021.9.peg.22 | DNA-directed RNA polymerase subunit beta'                          | DNA-directed RNA polymerase beta' subunit (EC 2.7.7.6)                                           | DNA-directed RNA polymerase subunit beta' (EC 2.7.7.6)                                              |                                                    |
| 254780143 | 537021.9.peg.23 | DNA-directed RNA polymerase subunit beta                           | DNA-directed RNA polymerase beta subunit (EC 2.7.7.6)                                            | DNA-directed RNA polymerase subunit beta (EC 2.7.7.6)                                               |                                                    |
| 254780144 | 537021.9.peg.24 | 50S ribosomal protein L12P                                         | LSU ribosomal protein L7/L12 (P1/P2)                                                             | 50S ribosomal protein L12P                                                                          |                                                    |
| 254780145 | 537021.9.peg.25 | 50S ribosomal protein L10                                          | LSU ribosomal protein L10p (P0)                                                                  | 50S ribosomal protein L10                                                                           |                                                    |
| 254780146 | 537021.9.peg.27 | 50S ribosomal protein L1                                           | LSU ribosomal protein L1p (L10Ae)                                                                | 50S ribosomal protein L1                                                                            |                                                    |
| 254780147 | 537021.9.peg.28 | 50S ribosomal protein L11                                          | LSU ribosomal protein L11p (L12e)                                                                | 50S ribosomal protein L11                                                                           |                                                    |
| 254780148 | 537021.9.peg.29 | transcription antitermination protein NusG                         | Transcription antitermination protein NusG                                                       | transcription antitermination protein NusG                                                          |                                                    |
| 254780149 | 537021.9.peg.30 | hypothetical protein                                               | preprotein translocase                                                                           | Preprotein translocase subunit SecE                                                                 | transmembrane protein                              |
| 254780150 | 537021.9.peg.31 | translation elongation factor Tu                                   | Translation elongation factor Tu                                                                 | translation elongation factor Tu                                                                    |                                                    |
| 254780151 | 537021.9.peg.32 | tRNA-specific 2-thiouridylase MnmA                                 | tRNA (5-methylaminomethyl-2-thiouridylate)-methyltransferase (EC 2.1.1.61)                       | tRNA methyl transferase (EC 2.1.1.61)                                                               | wrong start protein should start from the second M |
| N/A       | 537021.9.peg.33 | N/A                                                                | D-3-phosphoglycerate dehydrogenase                                                               | D-3-phosphoglycerate dehydrogenase                                                                  | 1/4 of a protein                                   |
| N/A       | 537021.9.peg.34 | N/A                                                                | D-3-phosphoglycerate dehydrogenase (EC 1.1.1.95)                                                 | D-3-phosphoglycerate dehydrogenase                                                                  | 1/4 of a protein                                   |
| 254780152 | 537021.9.peg.35 | D-3-phosphoglycerate dehydrogenase                                 | D-3-phosphoglycerate dehydrogenase (EC 1.1.1.95)                                                 | D-3-phosphoglycerate dehydrogenase                                                                  | 1/4 of a protein                                   |
| N/A       | 537021.9.peg.36 | N/A                                                                | hypothetical protein                                                                             | D-3-phosphoglycerate dehydrogenase                                                                  | 1/4 of a protein                                   |
| 254780153 | 537021.9.peg.37 | phosphoserine aminotransferase                                     | Phosphoserine aminotransferase (EC 2.6.1.52)                                                     | phosphoserine aminotransferase (EC 2.6.1.52)                                                        |                                                    |
| 254780154 | 537021.9.peg.38 | hypothetical protein                                               | hypothetical protein                                                                             | unknown                                                                                             |                                                    |
| 254780156 | 537021.9.peg.39 | putative inositol-1-monophosphatase                                | Inositol-1-monophosphatase (EC 3.1.3.25)                                                         | inositol-1-monophosphatase (EC 3.1.3.25)                                                            |                                                    |
| 254780157 | 537021.9.peg.40 | phosphoribosylaminoimidazole carboxylase catalytic subunit protein | Phosphoribosylaminoimidazole carboxylase catalytic subunit (EC 4.1.1.21)                         | phosphoribosylaminoimidazole carboxylase (EC 4.1.1.21)                                              |                                                    |
| 254780158 | 537021.9.peg.41 | phosphoribosylaminoimidazole carboxylase ATPase subunit            | Phosphoribosylaminoimidazole carboxylase ATPase subunit (EC 4.1.1.21)                            | phosphoribosylaminoimidazole carboxylase ATPase (EC 4.1.1.21)                                       |                                                    |

|           |                 |                                                                       |                                                                               |                                                                                   |                                                           |
|-----------|-----------------|-----------------------------------------------------------------------|-------------------------------------------------------------------------------|-----------------------------------------------------------------------------------|-----------------------------------------------------------|
| N/A       | 537021.9.peg.42 | N/A                                                                   | hypothetical protein                                                          | missing in NCBI database, but should have it, it is ribosome protein              | missing in NCBI database, but should have it              |
| 254780159 | 537021.9.peg.43 | hypothetical protein                                                  | hypothetical protein                                                          | unknown                                                                           | transmembrane protein                                     |
| 254780160 | 537021.9.peg.44 | hypothetical protein                                                  | hypothetical protein                                                          | unknown                                                                           | no reliable prediction                                    |
| 254780161 | 537021.9.peg.45 | phytoene synthase protein                                             | Phytoene synthase (EC 2.5.1.32)                                               | phytoene synthase protein (EC 2.5.1.32)                                           |                                                           |
| 254780162 | 537021.9.peg.46 | hypothetical protein                                                  | hypothetical protein                                                          | unknown                                                                           | wrong gene prediction?                                    |
| 254780163 | 537021.9.peg.47 | ATP-dependent Clp protease ATP-binding subunit                        | ATP-dependent Clp protease ATP-binding subunit ClpA                           | ATP-dependent Clp protease ATP-binding subunit                                    |                                                           |
| 254780164 | 537021.9.peg.48 | ATP-dependent Clp protease adaptor protein ClpS                       | ATP-dependent Clp protease adaptor protein ClpS                               | ATP-dependent Clp protease adaptor protein ClpS                                   | wrong start point? But start from??                       |
| 254780165 | 537021.9.peg.49 | hypothetical protein                                                  | hypothetical protein                                                          | unknown                                                                           | correct protein, unknown function                         |
| 254780166 | 537021.9.peg.50 | hydrolase protein                                                     | probable hydrolase protein                                                    | hydrolase                                                                         |                                                           |
| 254780167 | 537021.9.peg.51 | hypothetical protein                                                  | hypothetical protein                                                          | zinc-finger                                                                       | need to check out function                                |
| 254780168 | 537021.9.peg.52 | monoxygenase FAD-binding protein                                      | Salicylate hydroxylase (EC 1.14.13.1)                                         | salicylate hydroxylase (EC 1.14.13.1)                                             |                                                           |
| 254780169 | 537021.9.peg.53 | hypothetical protein                                                  | hypothetical protein                                                          | unknown                                                                           | wrong gene prediction, only 54 aa                         |
| 254780170 | 537021.9.peg.55 | cationic amino acid ABC transporter, periplasmic binding protein      | Glutamate Aspartate periplasmic binding protein precursor GltI (TC 3.A.1.3.4) | ABC-type importer for general L-amino acids, substrate binding component          | has signal peptide                                        |
| 254780171 | 537021.9.peg.56 | ABC transporter membrane spanning protein (amino acid)                | Glutamate Aspartate transport system permease protein GltJ (TC 3.A.1.3.4)     | ABC-type importer for general L-amino acids, transmembrane component              | transmembrane protein                                     |
| 254780172 | 537021.9.peg.57 | general L-amino acid transport system permease protein                | Glutamate Aspartate transport system permease protein GltK (TC 3.A.1.3.4)     | ABC-type importer for general L-amino acids, transmembrane component              | transmembrane protein                                     |
| 254780173 | 537021.9.peg.58 | ABC transporter related protein                                       | Amino acid ABC transporter, ATP-binding protein                               | ABC-type importer for general L-amino acids, ATPase component                     |                                                           |
| 254780174 | 537021.9.peg.59 | putative oxidoreductase protein                                       | PUTATIVE OXIDOREDUCTASE PROTEIN                                               | oxidoreductase protein in electron transport chain complex I                      | start point wrong prediction                              |
| 254780175 | 537021.9.peg.61 | hypothetical protein                                                  | hypothetical protein                                                          | unknown                                                                           | wrong gene prediction, only 38 aa, and find nothing in NR |
| 254780176 | 537021.9.peg.62 | hypothetical protein                                                  | hypothetical protein                                                          | unknown                                                                           | No consensus prediction                                   |
| 254780177 | 537021.9.peg.63 | lipoyltransferase                                                     | Octanoate-[acyl-carrier-protein]-protein-N-octanoyltransferase                | lipoyltransferase (EC:2.3.1.181)                                                  |                                                           |
| 254780178 | 537021.9.peg.64 | queuine tRNA-ribosyltransferase                                       | tRNA-guanine transglycosylase (EC 2.4.2.29)                                   | queuine tRNA-ribosyltransferase (EC 2.4.2.29)                                     |                                                           |
| 254780179 | 537021.9.peg.65 | hypothetical protein                                                  | hypothetical protein                                                          | unknown                                                                           | transmembrane protein                                     |
| 254780180 | 537021.9.peg.66 | S-adenosylmethionine:tRNA ribosyltransferase-isomerase                | S-adenosylmethionine:tRNA ribosyltransferase-isomerase (EC 5.-.-.-)           | S-adenosylmethionine:tRNA ribosyltransferase-isomerase (EC 5.-.-.-)               |                                                           |
| 254780181 | 537021.9.peg.67 | phosphopantetheine adenyltransferase                                  | Phosphopantetheine adenyltransferase (EC 2.7.7.3)                             | phosphopantetheine adenyltransferase (EC 2.7.7.3)                                 |                                                           |
| 254780182 | 537021.9.peg.68 | DNA gyrase subunit A                                                  | DNA gyrase subunit A (EC 5.99.1.3)                                            | DNA gyrase subunit A (EC 5.99.1.3)                                                |                                                           |
| 254780183 | 537021.9.peg.69 | single-strand binding protein (ssb)                                   | Single-stranded DNA-binding protein                                           | single-strand binding protein (ssb)                                               |                                                           |
| 254780184 | 537021.9.peg.70 | excinuclease ABC subunit A                                            | Excinuclease ABC subunit A                                                    | excinuclease ABC subunit A, uvrA                                                  |                                                           |
| 254780185 | 537021.9.peg.71 | glutamine synthetase protein                                          | Glutamine synthetase type I (EC 6.3.1.2)                                      | glutamine synthetase (EC 6.3.1.2)                                                 |                                                           |
| 254780186 | 537021.9.peg.72 | glutaminase                                                           | Glutaminase (EC 3.5.1.2)                                                      | glutaminase (EC 3.5.1.2)                                                          |                                                           |
| 254780187 | 537021.9.peg.73 | 30S ribosomal protein S4                                              | SSU ribosomal protein S4p (S9e)                                               | 30S ribosomal protein S4                                                          |                                                           |
| N/A       | 537021.9.peg.74 | N/A                                                                   | Ribonucleotide reductase of class Ia (aerobic), beta subunit (EC 1.17.4.1)    | ribonucleotide-diphosphate reductase subunit beta                                 | 1/2 of a protein                                          |
| N/A       | 537021.9.peg.75 | N/A                                                                   | Ribonucleotide reductase of class Ia (aerobic), beta subunit (EC 1.17.4.1)    | ribonucleotide-diphosphate reductase subunit beta                                 | 1/2 of a protein                                          |
| 254780189 | 537021.9.peg.76 | hypothetical protein                                                  | hypothetical protein                                                          | unknown                                                                           |                                                           |
| 254780190 | 537021.9.peg.77 | fumarate hydratase                                                    | Fumarate hydratase class II (EC 4.2.1.2)                                      | fumarate hydratase (EC 4.2.1.2)                                                   |                                                           |
| 254780191 | 537021.9.peg.78 | alanyl-tRNA synthetase                                                | Alanyl-tRNA synthetase (EC 6.1.1.7)                                           | alanyl-tRNA synthetase (EC 6.1.1.7)                                               |                                                           |
| 255764460 | 537021.9.peg.79 | recombinase A                                                         | RecA protein                                                                  | recombinase A                                                                     |                                                           |
| 254780193 | 537021.9.peg.81 | lipid A ABC exporter family, fused ATPase and inner membrane subunits | hypothetical protein                                                          | ABC-type exporter for multiple drug and lipid, transmembrane and ATPase component | transmembrane protein                                     |
| 254780194 | 537021.9.peg.83 | 50S ribosomal protein L31                                             | LSU ribosomal protein L31p                                                    | 50S ribosomal protein L31                                                         |                                                           |

|           |                |                                                          |                                                                                       |                                                                                      |                                                      |
|-----------|----------------|----------------------------------------------------------|---------------------------------------------------------------------------------------|--------------------------------------------------------------------------------------|------------------------------------------------------|
| 254780195 | 537021.9.p.84  | CTP synthetase                                           | CTP synthase (EC 6.3.4.2)                                                             | CTP synthetase (EC 6.3.4.2)                                                          |                                                      |
| 254780196 | 537021.9.p.85  | hypothetical protein                                     | hypothetical protein                                                                  | protein translocase (for protein to pass the inner membrane)                         | transmembrane protein                                |
| 254780197 | 537021.9.p.86  | triosephosphate isomerase protein                        | Triosephosphate isomerase (EC 5.3.1.1)                                                | triosephosphate isomerase protein (EC 5.3.1.1)                                       |                                                      |
| 254780198 | N/A            | hypothetical protein                                     | N/A                                                                                   | unknown                                                                              | transmembrane protein                                |
| 254780199 | 537021.9.p.87  | outer membrane lipoprotein                               | hypothetical protein                                                                  | outermembrane lipoprotein                                                            | has signal peptide                                   |
| 254780200 | 537021.9.p.88  | ferrochelatase                                           | Ferrochelatase, protoheme ferro-lyase (EC 4.99.1.1)                                   | ferrochelatase (EC 4.99.1.1)                                                         |                                                      |
| 254780201 | 537021.9.p.89  | hypothetical protein                                     | hypothetical protein                                                                  | Lipopolysaccharide biosynthesis protein                                              |                                                      |
| 254780202 | 537021.9.p.90  | hypothetical protein                                     | Queuosine Biosynthesis QueE Radical SAM                                               | organic radical activating enzymes                                                   |                                                      |
| N/A       | 537021.9.p.91  | N/A                                                      | Putative deoxyribonuclease YcfH                                                       | hydrolase, just piece of protein 254780214                                           | just piece of protein 254780214                      |
| 254780203 | 537021.9.p.92  | hypothetical protein                                     | hypothetical protein                                                                  | unknown                                                                              |                                                      |
| 254780204 | 537021.9.p.93  | hypothetical protein                                     | hypothetical protein                                                                  | unknown                                                                              | transmembrane protein                                |
| 254780205 | 537021.9.p.94  | prenyltransferase                                        | 4-hydroxybenzoate polyprenyltransferase (EC 2.5.1.-)                                  | 4-hydroxybenzoate polyprenyltransferase (EC 2.5.1.-)                                 | transmembrane protein                                |
| 254780206 | 537021.9.p.95  | phosphoribosylamine--glycine ligase                      | Phosphoribosylamine--glycine ligase (EC 6.3.4.13)                                     | phosphoribosylamine--glycine ligase (EC 6.3.4.13)                                    |                                                      |
| 254780207 | 537021.9.p.96  | hypothetical protein                                     | hypothetical protein                                                                  | unknown                                                                              | has signal peptide                                   |
| 254780209 | 537021.9.p.99  | hypothetical protein                                     | hypothetical protein                                                                  | unknown                                                                              | has signal peptide                                   |
| 254780210 | 537021.9.p.100 | hypothetical protein                                     | hypothetical protein                                                                  | unknown                                                                              |                                                      |
| 254780212 | 537021.9.p.101 | bacterioferritin comigratory protein                     | Thiol peroxidase, Bcp-type (EC 1.11.1.15)                                             | bacterioferritin comigratory protein/peroxiredoxin (EC 1.11.1.15)                    | bacterioferritin comigratory protein = peroxiredoxin |
| 254780213 | 537021.9.p.102 | hypothetical protein                                     | hypothetical protein                                                                  | unknown                                                                              |                                                      |
| 254780214 | 537021.9.p.103 | metal-dependent hydrolase protein                        | Metal-dependent hydrolases of the beta-lactamase superfamily I; PhnP protein          | metal-dependent hydrolase protein                                                    |                                                      |
| 254780215 | 537021.9.p.104 | hypothetical protein                                     | Putative deoxyribonuclease YcfH                                                       | Dnase                                                                                |                                                      |
| 255764461 | 537021.9.p.105 | methionyl-tRNA synthetase                                | Methionyl-tRNA synthetase (EC 6.1.1.10)                                               | methionyl-tRNA synthetase (EC 6.1.1.10)                                              |                                                      |
| 254780217 | 537021.9.p.106 | DNA polymerase III subunit delta'                        | DNA polymerase III delta prime subunit (EC 2.7.7.7)                                   | DNA polymerase III subunit delta' (EC 2.7.7.7)                                       |                                                      |
| 254780218 | 537021.9.p.107 | thymidylate kinase                                       | Thymidylate kinase (EC 2.7.4.9)                                                       | thymidylate kinase (EC 2.7.4.9)                                                      |                                                      |
| 254780219 | 537021.9.p.108 | hypothetical protein                                     | hypothetical protein                                                                  | unknown                                                                              |                                                      |
| 254780220 | N/A            | hypothetical protein                                     | N/A                                                                                   | unknown                                                                              | has signal peptide                                   |
| 254780221 | 537021.9.p.110 | hypothetical protein                                     | hypothetical protein                                                                  | unknown                                                                              | has signal peptide                                   |
| 254780222 | 537021.9.p.111 | DNA topoisomerase IV subunit B                           | Topoisomerase IV subunit B (EC 5.99.1.-)                                              | DNA topoisomerase IV subunit B (EC 5.99.1.-)                                         |                                                      |
| 254780223 | 537021.9.p.112 | ABC transporter permease                                 | hypothetical protein                                                                  | permease                                                                             | transmembrane protein                                |
| 254780224 | 537021.9.p.113 | hypothetical protein                                     | hypothetical protein                                                                  | unknown                                                                              |                                                      |
| 254780225 | 537021.9.p.114 | peptidyl-tRNA hydrolase                                  | Peptidyl-tRNA hydrolase (EC 3.1.1.29)                                                 | peptidyl-tRNA hydrolase (EC 3.1.1.29)                                                |                                                      |
| 254780226 | 537021.9.p.115 | translation-associated GTPase                            | GTP-binding and nucleic acid-binding protein YchF                                     | translation-associated GTPase                                                        |                                                      |
| 254780227 | 537021.9.p.117 | pyrophosphate--fructose-6-phosphate 1-phosphotransferase | Pyrophosphate--fructose 6-phosphate 1-phosphotransferase, alpha subunit (EC 2.7.1.90) | pyrophosphate--fructose-6-phosphate 1-phosphotransferase subunit alpha (EC 2.7.1.90) |                                                      |
| 254780228 | 537021.9.p.118 | hypothetical protein                                     | Integral membrane protein                                                             | unknown                                                                              | transmembrane protein                                |
| 254780229 | 537021.9.p.119 | hypothetical protein                                     | hypothetical protein                                                                  | DNA helicase                                                                         |                                                      |
| 254780230 | 537021.9.p.120 | hypothetical protein                                     | hypothetical conserved membrane protein                                               | unknown                                                                              | transmembrane protein                                |
| 254780231 | 537021.9.p.121 | hypothetical protein                                     | hypothetical protein                                                                  | unknown                                                                              |                                                      |
| 254780232 | 537021.9.p.122 | inorganic pyrophosphatase                                | Inorganic pyrophosphatase (EC 3.6.1.1)                                                | inorganic pyrophosphatase (EC 3.6.1.1)                                               |                                                      |
| 254780233 | 537021.9.p.123 | GTP-binding protein                                      | GTP-binding protein TypA/BipA                                                         | GTPase, TypA involved in stress response                                             |                                                      |
| 254780234 | 537021.9.p.124 | argininosuccinate synthase                               | Argininosuccinate synthase (EC 6.3.4.5)                                               | argininosuccinate synthase (EC 6.3.4.5)                                              |                                                      |
| 254780235 | 537021.9.p.125 | hypothetical protein                                     | hypothetical protein                                                                  | unknown                                                                              | transmembrane protein                                |
| 254780236 | 537021.9.p.126 | 50S ribosomal protein L17                                | LSU ribosomal protein L17p                                                            | 50S ribosomal protein L17                                                            |                                                      |
| 254780237 | 537021.9.p.127 | DNA-directed RNA polymerase subunit alpha                | DNA-directed RNA polymerase alpha subunit (EC 2.7.7.6)                                | DNA-directed RNA polymerase subunit alpha (EC 2.7.7.6)                               |                                                      |
| 254780238 | 537021.9.p.129 | 30S ribosomal protein S11                                | SSU ribosomal protein S11p (S14e)                                                     | 30S ribosomal protein S11                                                            |                                                      |
| 254780239 | 537021.9.p.130 | 30S ribosomal protein S13                                | SSU ribosomal protein S13p (S18e)                                                     | 30S ribosomal protein S13                                                            |                                                      |
| 254780240 | 537021.9.p.131 | adenylate kinase                                         | Adenylate kinase (EC 2.7.4.3)                                                         | adenylate kinase (EC 2.7.4.3)                                                        |                                                      |
| 254780241 | 537021.9.p.132 | preprotein translocase subunit SecY                      | Preprotein translocase secY subunit (TC 3.A.5.1.1)                                    | preprotein translocase subunit SecY                                                  | transmembrane protein                                |
| 254780242 | 537021.9.p.133 | 50S ribosomal protein L15                                | LSU ribosomal protein L15p (L27Ae)                                                    | 50S ribosomal protein L15                                                            |                                                      |

|           |                  |                                                                |                                                                                        |                                                                 |                       |
|-----------|------------------|----------------------------------------------------------------|----------------------------------------------------------------------------------------|-----------------------------------------------------------------|-----------------------|
| 254780243 | 537021.9.peg.134 | 50S ribosomal protein L30                                      | LSU ribosomal protein L30p (L7e)                                                       | 50S ribosomal protein L30                                       |                       |
| 254780244 | 537021.9.peg.135 | 30S ribosomal protein S5                                       | SSU ribosomal protein S5p (S2e)                                                        | 30S ribosomal protein S5                                        |                       |
| 254780245 | 537021.9.peg.136 | 50S ribosomal protein L18                                      | LSU ribosomal protein L18p (L5e)                                                       | 50S ribosomal protein L18                                       |                       |
| 254780246 | 537021.9.peg.137 | 50S ribosomal protein L6                                       | LSU ribosomal protein L6p (L9e)                                                        | 50S ribosomal protein L6                                        |                       |
| 254780247 | 537021.9.peg.138 | 30S ribosomal protein S8                                       | SSU ribosomal protein S8p (S15Ae)                                                      | 30S ribosomal protein S8                                        |                       |
| 254780248 | 537021.9.peg.139 | 30S ribosomal protein S14                                      | SSU ribosomal protein S14p (S29e) Zinc-independent                                     | 30S ribosomal protein S14                                       |                       |
| 254780249 | 537021.9.peg.140 | 50S ribosomal protein L5                                       | LSU ribosomal protein L5p (L11e)                                                       | 50S ribosomal protein L5                                        |                       |
| 254780250 | 537021.9.peg.141 | 50S ribosomal protein L24                                      | LSU ribosomal protein L24p (L26e)                                                      | 50S ribosomal protein L24                                       |                       |
| 254780251 | 537021.9.peg.142 | 50S ribosomal protein L14                                      | LSU ribosomal protein L14p (L23e)                                                      | 50S ribosomal protein L14                                       |                       |
| 254780252 | 537021.9.peg.143 | 30S ribosomal protein S17                                      | SSU ribosomal protein S17p (S11e)                                                      | 30S ribosomal protein S17                                       |                       |
| 254780253 | 537021.9.peg.144 | ribosomal protein L29                                          | LSU ribosomal protein L29p (L35e)                                                      | ribosomal protein L29                                           |                       |
| 254780254 | 537021.9.peg.145 | 50S ribosomal protein L16                                      | LSU ribosomal protein L16p (L10e)                                                      | 50S ribosomal protein L16                                       |                       |
| 254780255 | 537021.9.peg.146 | 30S ribosomal protein S3                                       | SSU ribosomal protein S3p (S3e)                                                        | 30S ribosomal protein S3                                        |                       |
| 254780256 | 537021.9.peg.147 | 50S ribosomal protein L22                                      | LSU ribosomal protein L22p (L17e)                                                      | 50S ribosomal protein L22                                       |                       |
| 254780257 | 537021.9.peg.148 | SSU ribosomal protein S19P                                     | SSU ribosomal protein S19p (S15e)                                                      | SSU ribosomal protein S19P                                      |                       |
| 254780258 | 537021.9.peg.149 | 50S ribosomal protein L2                                       | LSU ribosomal protein L2p (L8e)                                                        | 50S ribosomal protein L2                                        |                       |
| 254780259 | 537021.9.peg.150 | 50S ribosomal protein L23                                      | LSU ribosomal protein L23p (L23Ae)                                                     | 50S ribosomal protein L23                                       |                       |
| 254780260 | 537021.9.peg.151 | 50S ribosomal protein L4                                       | LSU ribosomal protein L4p (L1e)                                                        | 50S ribosomal protein L4                                        |                       |
| 254780261 | 537021.9.peg.152 | 50S ribosomal protein L3                                       | LSU ribosomal protein L3p (L3e)                                                        | 50S ribosomal protein L3                                        |                       |
| 254780262 | 537021.9.peg.153 | 30S ribosomal protein S10                                      | SSU ribosomal protein S10p (S20e)                                                      | 30S ribosomal protein S10                                       |                       |
| 254780263 | 537021.9.peg.154 | translation elongation factor Tu                               | Translation elongation factor Tu                                                       | translation elongation factor Tu                                |                       |
| 254780264 | 537021.9.peg.155 | elongation factor G                                            | Translation elongation factor G                                                        | elongation factor G                                             |                       |
| 254780265 | 537021.9.peg.156 | 30S ribosomal protein S7                                       | SSU ribosomal protein S7p (S5e)                                                        | 30S ribosomal protein S7                                        |                       |
| 254780266 | 537021.9.peg.157 | 30S ribosomal protein S12                                      | SSU ribosomal protein S12p (S23e)                                                      | 30S ribosomal protein S12                                       |                       |
| 254780267 | 537021.9.peg.158 | acetyl-CoA carboxylase biotin carboxyl carrier protein subunit | Biotin carboxyl carrier protein of acetyl-CoA carboxylase                              | acetyl-CoA carboxylase biotin carboxyl carrier                  |                       |
| 254780268 | 537021.9.peg.159 | acetyl-CoA carboxylase biotin carboxylase subunit              | Biotin carboxylase of acetyl-CoA carboxylase (EC 6.3.4.14)                             | acetyl-CoA carboxylase biotin carboxylase (EC 6.3.4.14)         |                       |
| 254780269 | 537021.9.peg.160 | leucyl/phenylalanyl-tRNA--protein transferase                  | Leucyl/phenylalanyl-tRNA--protein transferase (EC 2.3.2.6)                             | leucyl/phenylalanyl-tRNA--protein transferase (EC 2.3.2.6)      |                       |
| 254780270 | 537021.9.peg.161 | ATP-dependent protease La                                      | ATP-dependent protease La (EC 3.4.21.53) Type I                                        | ATP-dependent protease La (EC 3.4.21.53)                        |                       |
| 254780271 | 537021.9.peg.162 | ATP-dependent protease ATP-binding subunit ClpX                | ATP-dependent Clp protease ATP-binding subunit ClpX                                    | ATP-dependent protease ATP-binding subunit ClpX                 |                       |
| 254780272 | 537021.9.peg.163 | ATP-dependent Clp protease proteolytic subunit                 | ATP-dependent Clp protease proteolytic subunit (EC 3.4.21.92)                          | ATP-dependent Clp protease proteolytic subunit (EC 3.4.21.92)   |                       |
| 254780273 | 537021.9.peg.164 | putative ABC transporter ATP-binding protein                   | ABC transporter, ATP-binding protein                                                   | ABC-type ATPase, function as regulator for virulence gene, chvD |                       |
| 254780274 | 537021.9.peg.165 | lysophospholipase protein                                      | hypothetical protein                                                                   | lysophospholipase protein                                       |                       |
| 254780275 | 537021.9.peg.167 | SsrA-binding protein                                           | tmRNA-binding protein SmpB                                                             | SsrA-binding protein                                            |                       |
| 254780276 | 537021.9.peg.168 | dihydrodipicolinate synthase                                   | Dihydrodipicolinate synthase (EC 4.2.1.52)                                             | dihydrodipicolinate synthase (EC 4.2.1.52)                      |                       |
| 254780277 | 537021.9.peg.169 | DNA polymerase I                                               | DNA polymerase I (EC 2.7.7.7)                                                          | DNA polymerase I                                                |                       |
| 254780278 | 537021.9.peg.170 | phosphoglyceromutase                                           | Phosphoglycerate mutase (EC 5.4.2.1)                                                   | phosphoglyceromutase (EC 5.4.2.1)                               |                       |
| 254780279 | 537021.9.peg.171 | dihydrodipicolinate reductase                                  | Dihydrodipicolinate reductase (EC 1.3.1.26)                                            | dihydrodipicolinate reductase (EC 1.3.1.26)                     |                       |
| 254780280 | 537021.9.peg.172 | glucokinase                                                    | Glucokinase (EC 2.7.1.2)                                                               | glucokinase (EC 2.7.1.2)                                        |                       |
| 254780281 | 537021.9.peg.173 | cytochrome-c oxidase assembly factor protein                   | Cytochrome oxidase biogenesis protein Sco1/SenC/PrrC, putative copper metallochaperone | cytochrome-c oxidase assembly factor protein                    | has signal peptide    |
| 254780282 | 537021.9.peg.174 | putative transcription regulator protein                       | Transcriptional regulator, LysR family                                                 | putative transcription regulator protein                        |                       |
| 254780283 | 537021.9.peg.175 | thioredoxin reductase (NADPH) protein                          | Thioredoxin reductase (EC 1.8.1.9)                                                     | thioredoxin reductase (NADPH) protein (EC 1.8.1.9)              |                       |
| 254780284 | 537021.9.peg.176 | hypothetical protein                                           | hypothetical protein                                                                   | unknown                                                         | transmembrane protein |
| 254780285 | 537021.9.peg.177 | arginyl-tRNA synthetase                                        | Arginyl-tRNA synthetase (EC 6.1.1.19)                                                  | arginyl-tRNA synthetase (EC 6.1.1.19)                           |                       |
| 254780286 | 537021.9.peg.178 | deoxyguanosinetriphosphate triphosphohydrolase-like protein    | Deoxyguanosinetriphosphate triphosphohydrolase (EC 3.1.5.1)                            | dGTP triphosphohydrolase (EC 3.1.5.1)                           |                       |
| 254780287 | 537021.9.peg.179 | iron-sulfur cluster assembly accessory protein                 | probable iron binding protein from the HesB_IscA_SufA family                           | iron-sulfur cluster assembly accessory protein                  |                       |
| 254780288 | 537021.9.peg.180 | exodeoxyribonuclease III protein                               | Exodeoxyribonuclease III (EC 3.1.11.2)                                                 | exodeoxyribonuclease III protein (EC 3.1.11.2)                  |                       |

|           |                  |                                                                              |                                                                                           |                                                                     |                            |
|-----------|------------------|------------------------------------------------------------------------------|-------------------------------------------------------------------------------------------|---------------------------------------------------------------------|----------------------------|
| 254780289 | 537021.9.peg.181 | RNA polymerase sigma factor RpoD                                             | RNA polymerase sigma factor RpoD                                                          | RNA polymerase sigma factor RpoD                                    |                            |
| 254780290 | 537021.9.peg.182 | quinone oxidoreductase                                                       | Quinone oxidoreductase (EC 1.6.5.5)                                                       | quinone oxidoreductase                                              |                            |
| 254780291 | 537021.9.peg.183 | hypothetical protein                                                         | hypothetical protein                                                                      | unknown                                                             | transmembrane protein      |
| 254780292 | 537021.9.peg.184 | 50S ribosomal protein L13                                                    | LSU ribosomal protein L13p (L13Ae)                                                        | 50S ribosomal protein L13                                           | start point might be wrong |
| 254780293 | 537021.9.peg.185 | 30S ribosomal protein S9                                                     | SSU ribosomal protein S9p (S16e)                                                          | 30S ribosomal protein S9                                            |                            |
| 254780294 | 537021.9.peg.187 | N-acetyl-gamma-glutamyl-phosphate reductase                                  | N-acetyl-gamma-glutamyl-phosphate reductase (EC 1.2.1.38)                                 | N-acetyl-gamma-glutamyl-phosphate reductase (EC 1.2.1.38)           |                            |
| 254780295 | 537021.9.peg.188 | tRNA pseudouridine synthase A                                                | tRNA pseudouridine synthase A (EC 4.2.1.70)                                               | tRNA pseudouridine synthase A (EC 4.2.1.70)                         |                            |
| 255764462 | 537021.9.peg.189 | methionyl-tRNA formyltransferase                                             | Methionyl-tRNA formyltransferase (EC 2.1.2.9)                                             | methionyl-tRNA formyltransferase (EC 2.1.2.9)                       |                            |
| 254780297 | 537021.9.peg.190 | peptide deformylase                                                          | Peptide deformylase (EC 3.5.1.88)                                                         | peptide deformylase (EC 3.5.1.88)                                   |                            |
| 254780298 | 537021.9.peg.192 | putative transmembrane protein                                               | hypothetical multidrug efflux transporter protein                                         | unknown                                                             | transmembrane protein      |
| 254780299 | 537021.9.peg.193 | acyl-CoA dehydrogenase protein                                               | Acyl-CoA dehydrogenase (EC 1.3.99.3)                                                      | acyl-CoA dehydrogenase protein (EC 1.3.99.3)                        |                            |
| 254780300 | 537021.9.peg.194 | aspartate carbamoyltransferase catalytic subunit                             | Aspartate carbamoyltransferase (EC 2.1.3.2)                                               | aspartate carbamoyltransferase catalytic subunit (EC 2.1.3.2)       |                            |
| 254780301 | 537021.9.peg.195 | dihydroorotase                                                               | Dihydroorotase (EC 3.5.2.3)                                                               | dihydroorotase (EC 3.5.2.3)                                         |                            |
| 254780302 | 537021.9.peg.196 | putative glycerol-3-phosphate acyltransferase PlsY                           | Acyl-phosphate:glycerol-3-phosphate O-acyltransferase PlsY                                | glycerol-3-phosphate acyltransferase                                | transmembrane protein      |
| 254780303 | 537021.9.peg.197 | DNA protecting protein DprA                                                  | putative smf protein                                                                      | DNA protecting protein DprA                                         | 1/3 of the protein         |
| 254780304 | N/A              | DNA protecting protein DprA                                                  | N/A                                                                                       | DNA protecting protein DprA                                         | 1/3 of the protein         |
| 254780305 | 537021.9.peg.198 | hypothetical protein                                                         | hypothetical protein                                                                      | DNA protecting protein DprA                                         | 1/3 of the protein         |
| 254780306 | 537021.9.peg.199 | DNA topoisomerase I                                                          | DNA topoisomerase I (EC 5.99.1.2)                                                         | DNA topoisomerase I (EC 5.99.1.2)                                   |                            |
| 254780307 | 537021.9.peg.200 | aspartate-semialdehyde dehydrogenase                                         | Aspartate-semialdehyde dehydrogenase (EC 1.2.1.11)                                        | aspartate-semialdehyde dehydrogenase (EC 1.2.1.11)                  |                            |
| 254780308 | 537021.9.peg.201 | putative membrane-bound lytic murein transglycosylase signal peptide protein | Membrane-bound lytic murein transglycosylase B precursor (EC 3.2.1.-)                     | lytic murein transglycosylase protein                               | has signal peptide         |
| 254780309 | 537021.9.peg.202 | comF family protein                                                          | Competence protein comF                                                                   | Competence protein comF                                             | 1/2 of the protein         |
| 254780310 | 537021.9.peg.203 | hypothetical protein                                                         | hypothetical protein                                                                      | Competence protein comF                                             | 1/2 of the protein         |
| 254780311 | 537021.9.peg.205 | hypothetical protein                                                         | Expressed protein                                                                         | peroxiredoxin                                                       |                            |
| 254780312 | 537021.9.peg.206 | response regulator receiver protein                                          | Response regulator                                                                        | two component system regulator protein                              |                            |
| 254780313 | 537021.9.peg.207 | ribosomal RNA methyltransferase RrmJ/FtsJ                                    | Cell division protein FtsJ / Ribosomal RNA large subunit methyltransferase E (EC 2.1.1.-) | ribosomal RNA methyltransferase RrmJ/FtsJ (EC 2.1.1.-)              |                            |
| 254780314 | 537021.9.peg.208 | outer membrane protein                                                       | porin outer membrane protein                                                              | outer membrane protein                                              | has signal peptide         |
| 254780315 | 537021.9.peg.209 | hypothetical protein                                                         | hypothetical protein                                                                      | unknown                                                             |                            |
| 254780316 | 537021.9.peg.210 | phenylalanyl-tRNA synthetase subunit beta                                    | Phenylalanyl-tRNA synthetase beta chain (EC 6.1.1.20)                                     | phenylalanyl-tRNA synthetase subunit beta (EC 6.1.1.20)             |                            |
| 254780317 | 537021.9.peg.211 | phenylalanyl-tRNA synthetase, alpha subunit                                  | Phenylalanyl-tRNA synthetase alpha chain (EC 6.1.1.20)                                    | phenylalanyl-tRNA synthetase, alpha subunit (EC 6.1.1.20)           |                            |
| 254780318 | 537021.9.peg.212 | ribosomal protein L20                                                        | LSU ribosomal protein L20p                                                                | ribosomal protein L20                                               |                            |
| 254780319 | 537021.9.peg.213 | 50S ribosomal protein L35                                                    | LSU ribosomal protein L35p                                                                | 50S ribosomal protein L35                                           |                            |
| 254780320 | 537021.9.peg.214 | translation initiation factor IF-3                                           | Translation initiation factor 3                                                           | translation initiation factor IF-3                                  |                            |
| 254780321 | 537021.9.peg.215 | GTP-binding protein LepA                                                     | Translation elongation factor LepA                                                        | GTP-binding protein LepA                                            |                            |
| 254780322 | 537021.9.peg.216 | SAM-dependent methyltransferase protein                                      | probable SAM-dependent methyltransferase protein                                          | SAM-dependent methyltransferase protein                             |                            |
| 254780323 | 537021.9.peg.217 | ATP/ADP translocase                                                          | Nucleotide related transporter , NTT family                                               | ATP/ADP translocase                                                 | transmembrane protein      |
| 254780324 | 537021.9.peg.219 | hypothetical protein                                                         | hypothetical protein                                                                      | unknown                                                             | transmembrane protein      |
| 254780325 | 537021.9.peg.220 | mutator MutT protein                                                         | 5-methyl-dCTP pyrophosphohydrolase (EC 3.6.1.-)                                           | mutator MutT protein (EC 3.6.1.-)                                   |                            |
| 254780326 | 537021.9.peg.221 | bifunctional ornithine acetyltransferase/N-acetylglutamate synthase protein  | Glutamate N-acetyltransferase (EC 2.3.1.35) / N-acetylglutamate synthase (EC 2.3.1.1)     | bifunctional ornithine acetyltransferase/N-acetylglutamate synthase |                            |
| 254780327 | 537021.9.peg.222 | preprotein translocase subunit SecA                                          | Protein export cytoplasm protein SecA ATPase RNA helicase (TC 3.A.5.1.1)                  | preprotein translocase subunit SecA                                 |                            |
| 254780328 | 537021.9.peg.223 | UDP-glucose 4-epimerase                                                      | UDP-glucose 4-epimerase (EC 5.1.3.2)                                                      | UDP-glucose 4-epimerase (EC 5.1.3.2)                                |                            |
| 254780329 | 537021.9.peg.225 | 30S ribosomal protein S6                                                     | SSU ribosomal protein S6p                                                                 | 30S ribosomal protein S6                                            |                            |
| 254780330 | 537021.9.peg.226 | 30S ribosomal protein S18                                                    | SSU ribosomal protein S18p                                                                | 30S ribosomal protein S18                                           |                            |
| 254780331 | 537021.9.peg.228 | 50S ribosomal protein L9                                                     | LSU ribosomal protein L9p                                                                 | 50S ribosomal protein L9                                            |                            |
| 254780332 | 537021.9.peg.229 | replicative DNA helicase                                                     | Replicative DNA helicase (EC 3.6.1.-)                                                     | replicative DNA helicase (EC 3.6.1.-)                               |                            |
| 254780333 | 537021.9.peg.230 | alanine racemase                                                             | Alanine racemase (EC 5.1.1.1)                                                             | alanine racemase (EC 5.1.1.1)                                       |                            |

|           |                  |                                                                                               |                                                                                                                                        |                                                                                                                            |                       |
|-----------|------------------|-----------------------------------------------------------------------------------------------|----------------------------------------------------------------------------------------------------------------------------------------|----------------------------------------------------------------------------------------------------------------------------|-----------------------|
| 254780334 | 537021.9.peg.231 | DNA repair protein RadA                                                                       | DNA repair protein RadA                                                                                                                | DNA repair protein RadA                                                                                                    |                       |
| N/A       | 537021.9.peg.232 | N/A                                                                                           | hypothetical protein                                                                                                                   | unknown                                                                                                                    |                       |
| 254780335 | N/A              | colicin V production protein                                                                  | N/A                                                                                                                                    | colicin V production protein                                                                                               | transmembrane protein |
| 254780336 | 537021.9.peg.234 | amidophosphoribosyltransferase                                                                | Amidophosphoribosyltransferase (EC 2.4.2.14)                                                                                           | amidophosphoribosyltransferase (EC 2.4.2.14)                                                                               |                       |
| 254780337 | 537021.9.peg.235 | oxidoreductase protein                                                                        | putative short-chain dehydrogenase/reductase                                                                                           | oxidoreductase protein                                                                                                     |                       |
| 254780338 | 537021.9.peg.236 | hypothetical protein                                                                          | hypothetical protein                                                                                                                   | unknown                                                                                                                    | transmembrane protein |
| N/A       | 537021.9.peg.237 | N/A                                                                                           | hypothetical protein                                                                                                                   | unknown                                                                                                                    | transmembrane protein |
| 254780339 | 537021.9.peg.238 | hypothetical protein                                                                          | hypothetical protein                                                                                                                   | unknown                                                                                                                    |                       |
| 254780340 | 537021.9.peg.239 | proline/glycine betaine ABC transporter, ATP-binding protein                                  | L-proline glycine betaine ABC transport system permease protein ProV (TC 3.A.1.12.1)                                                   | ABC-type importer for Choline (vitamin Bp), ATPase component                                                               |                       |
| 254780341 | 537021.9.peg.240 | proline/glycine betaine ABC transporter, permease protein                                     | L-proline glycine betaine ABC transport system permease protein ProW (TC 3.A.1.12.1)                                                   | ABC-type importer for Choline (vitamin Bp), transmembrane component                                                        | transmembrane protein |
| 254780342 | 537021.9.peg.241 | substrate-binding region of ABC-type glycine betaine transport system                         | putative glycine betaine-binding ABC transporter protein                                                                               | ABC-type importer for Choline (vitamin Bp), substrate binding component                                                    | has signal peptide    |
| 254780343 | 537021.9.peg.242 | probable cation efflux protein                                                                | Cobalt-zinc-cadmium resistance protein                                                                                                 | cation efflux protein                                                                                                      | transmembrane protein |
| 254780344 | 537021.9.peg.243 | 7-cyano-7-deazaguanine reductase                                                              | NADPH dependent preQ0 reductase                                                                                                        | 7-cyano-7-deazaguanine reductase                                                                                           |                       |
| 254780345 | 537021.9.peg.244 | transcription antitermination protein NusB                                                    | Transcription termination protein NusB                                                                                                 | transcription antitermination protein NusB                                                                                 |                       |
| 254780346 | 537021.9.peg.245 | riboflavin synthase subunit beta                                                              | 6,7-dimethyl-8-ribityllumazine synthase (EC 2.5.1.9)                                                                                   | riboflavin synthase subunit beta (EC 2.5.1.9)                                                                              |                       |
| 254780347 | 537021.9.peg.246 | riboflavin synthase subunit alpha                                                             | Riboflavin synthase alpha chain (EC 2.5.1.9)                                                                                           | riboflavin synthase subunit alpha (EC 2.5.1.9)                                                                             |                       |
| 254780348 | 537021.9.peg.247 | 5-amino-6-(5-phosphoribosylamino)uracil reductase/diaminohydroxyphosphoribosylaminopyrimidine | Diaminohydroxyphosphoribosylaminopyrimidine deaminase (EC 3.5.4.26) / 5-amino-6-(5-phosphoribosylamino)uracil reductase (EC 1.1.1.193) | 5-amino-6-(5-phosphoribosylamino)uracil reductase/diaminohydroxyphosphoribosylaminopyrimidine (EC 3.5.4.26) (EC 1.1.1.193) |                       |
| 254780349 | 537021.9.peg.249 | serine hydroxymethyltransferase                                                               | Serine hydroxymethyltransferase (EC 2.1.2.1)                                                                                           | serine hydroxymethyltransferase (EC 2.1.2.1)                                                                               |                       |
| 254780350 | 537021.9.peg.250 | hypothetical protein                                                                          | hypothetical protein                                                                                                                   | unknown                                                                                                                    | has signal peptide    |
| 254780351 | 537021.9.peg.251 | MarR family transcriptional regulator                                                         | Transcriptional regulator, MarR family                                                                                                 | MarR family transcriptional regulator                                                                                      |                       |
| 255764463 | 537021.9.peg.253 | delta-aminolevulinic acid dehydratase                                                         | Porphobilinogen synthase (EC 4.2.1.24)                                                                                                 | delta-aminolevulinic acid dehydratase                                                                                      |                       |
| 254780353 | 537021.9.peg.255 | DNA topoisomerase IV subunit A                                                                | Topoisomerase IV subunit A (EC 5.99.1.-)                                                                                               | DNA topoisomerase IV subunit A (EC 5.99.1.-)                                                                               |                       |
| 254780354 | 537021.9.peg.256 | hypothetical protein                                                                          | hypothetical protein                                                                                                                   | unknown                                                                                                                    | transmembrane protein |
| 254780355 | 537021.9.peg.257 | type II citrate synthase                                                                      | Citrate synthase (si) (EC 2.3.3.1)                                                                                                     | type II citrate synthase (EC 2.3.3.1)                                                                                      |                       |
| 254780356 | 537021.9.peg.258 | hypothetical protein                                                                          | hypothetical protein                                                                                                                   | DNA uptake, ComEC/Rec2-related protein                                                                                     | transmembrane protein |
| 254780357 | 537021.9.peg.259 | hypothetical protein                                                                          | DNA internalization-related competence protein ComEC/Rec2                                                                              | DNA uptake, ComEC/Rec2-related protein                                                                                     | transmembrane protein |
| 255764464 | 537021.9.peg.260 | Cytidine/deoxycytidylate deaminase, zinc-binding region                                       | tRNA-specific adenosine-34 deaminase (EC 3.5.4.-)                                                                                      | adenosine deaminase (EC 3.5.4.-)                                                                                           |                       |
| 254780359 | 537021.9.peg.261 | GTP cyclohydrolase II protein (riboflavin biosynthesis)                                       | 3,4-dihydroxy-2-butanone 4-phosphate synthase / GTP cyclohydrolase II (EC 3.5.4.25)                                                    | GTP cyclohydrolase II protein (EC 3.5.4.25)                                                                                |                       |
| 254780360 | 537021.9.peg.262 | protoheme IX farnesyltransferase                                                              | Heme O synthase, protoheme IX farnesyltransferase (EC 2.5.1.-) COX10-CtaB                                                              | protoheme IX farnesyltransferase (EC 2.5.1.-)                                                                              | transmembrane protein |
| 254780361 | 537021.9.peg.263 | ribosomal protein L32                                                                         | LSU ribosomal protein L32p                                                                                                             | ribosomal protein L32                                                                                                      |                       |
| 255764465 | 537021.9.peg.264 | Na <sup>+</sup> /H <sup>+</sup> antiporter NhaA                                               | Na <sup>+</sup> /H <sup>+</sup> antiporter NhaA type                                                                                   | Na <sup>+</sup> /H <sup>+</sup> antiporter NhaA                                                                            | transmembrane protein |
| 254780363 | 537021.9.peg.265 | ferredoxin-NADP <sup>+</sup> reductase protein                                                | Flavodoxin reductases (ferredoxin-NADPH reductases) family 1                                                                           | ferredoxin-NADP <sup>+</sup> reductase protein                                                                             |                       |
| 254780364 | 537021.9.peg.266 | ferredoxin-NADP <sup>+</sup> reductase protein                                                | Ferredoxin--NADP(+) reductase (EC 1.18.1.2)                                                                                            | ferredoxin-NADP <sup>+</sup> reductase protein                                                                             |                       |
| 254780365 | 537021.9.peg.267 | UTP-glucose-1-phosphate uridylyltransferase protein                                           | UTP--glucose-1-phosphate uridylyltransferase (EC 2.7.7.9)                                                                              | UTP-glucose-1-phosphate uridylyltransferase (EC 2.7.7.9)                                                                   |                       |
| 255764466 | 537021.9.peg.268 | hypothetical protein                                                                          | Periplasmic thiol:disulfide oxidoreductase DsbB, required for DsbA reoxidation                                                         | Disulfide bond formation protein DsbB                                                                                      | transmembrane protein |
| 254780367 | 537021.9.peg.269 | ribonuclease protein                                                                          | Ribonuclease BN (EC 3.1.-.-)                                                                                                           | ribonuclease protein (EC 3.1.-.-)                                                                                          | transmembrane protein |
| 254780368 | 537021.9.peg.270 | electron transfer flavoprotein beta subunit                                                   | Electron transfer flavoprotein, beta subunit                                                                                           | electron transfer flavoprotein beta subunit                                                                                |                       |
| 254780369 | 537021.9.peg.271 | Electron transfer flavoprotein alpha subunit                                                  | Electron transfer flavoprotein, alpha subunit                                                                                          | Electron transfer flavoprotein alpha subunit                                                                               |                       |
| 254780370 | 537021.9.peg.272 | argininosuccinate lyase                                                                       | Argininosuccinate lyase (EC 4.3.2.1)                                                                                                   | argininosuccinate lyase (EC 4.3.2.1)                                                                                       |                       |
| 254780371 | 537021.9.peg.273 | diaminopimelate decarboxylase protein                                                         | Diaminopimelate decarboxylase (EC 4.1.1.20)                                                                                            | diaminopimelate decarboxylase protein (EC 4.1.1.20)                                                                        |                       |
| 254780372 | 537021.9.peg.274 | flagellar biosynthesis protein FliP                                                           | Flagellar biosynthesis protein FliP                                                                                                    | flagellar biosynthesis protein FliP                                                                                        | transmembrane protein |
| 254780373 | 537021.9.peg.275 | flagellar basal body-associated protein FliL                                                  | Flagellar biosynthesis protein fliL                                                                                                    | flagellar basal body-associated protein FliL                                                                               | transmembrane protein |
| 254780374 | 537021.9.peg.276 | flagellar basal body L-ring protein                                                           | Flagellar L-ring protein FliH                                                                                                          | flagellar basal body L-ring protein                                                                                        | has signal peptide    |

|           |                  |                                                           |                                                                                                            |                                                                           |                                                                              |
|-----------|------------------|-----------------------------------------------------------|------------------------------------------------------------------------------------------------------------|---------------------------------------------------------------------------|------------------------------------------------------------------------------|
| 254780375 | 537021.9.peg.277 | hypothetical protein                                      | hypothetical protein                                                                                       | unknown                                                                   | has signal peptide                                                           |
| 254780376 | 537021.9.peg.278 | flagellar basal body P-ring protein                       | Flagellar P-ring protein FlgI                                                                              | flagellar basal body P-ring protein                                       | has signal peptide                                                           |
| 254780377 | 537021.9.peg.279 | flagellar basal body P-ring biosynthesis protein FlgA     | Flagellar basal-body P-ring formation protein flgA                                                         | flagellar basal body P-ring biosynthesis protein                          | has signal peptide                                                           |
| 254780378 | 537021.9.peg.280 | flagellar basal body rod protein FlgG                     | Flagellar basal-body rod protein FlgG                                                                      | flagellar basal body rod protein FlgG                                     | extracellular, flagellar component, exported by flagellar assembly machinery |
| 254780379 | 537021.9.peg.281 | flagellar hook-basal body protein FliE                    | Flagellar hook-basal body complex protein FliE                                                             | flagellar hook-basal body protein FliE                                    | periplasmic, flagellar component, transported by flagellar                   |
| 254780380 | 537021.9.peg.282 | flagellar basal body rod protein FlgC                     | Flagellar basal-body rod protein FlgC                                                                      | flagellar basal body rod protein FlgC                                     | periplasmic, flagellar component, transported by flagellar                   |
| 254780381 | 537021.9.peg.283 | flagellar basal body rod protein FlgB                     | Flagellar basal-body rod protein FlgB                                                                      | flagellar basal body rod protein FlgB                                     | periplasmic, flagellar component, transported by flagellar                   |
| 254780382 | 537021.9.peg.284 | ATP dependent RNA helicase protein                        | ATP-dependent RNA helicase Atu1833                                                                         | ATP dependent RNA helicase protein                                        |                                                                              |
| 254780383 | 537021.9.peg.285 | endonuclease III                                          | Endonuclease III (EC 4.2.99.18)                                                                            | endonuclease III (EC 4.2.99.18)                                           |                                                                              |
| 254780384 | 537021.9.peg.286 | serralysin                                                | hypothetical protein                                                                                       | zinc-dependant protease                                                   |                                                                              |
| 255764467 | 537021.9.peg.287 | Type I secretion system ATPase, PrtD                      | hypothetical protein                                                                                       | Type I secretion system ATPase and permease, PrtD, ABC-exporter           | transmembrane protein                                                        |
| 254780386 | 537021.9.peg.288 | Type I secretion membrane fusion protein, HlyD            | Alkaline protease secretion protein AprE                                                                   | Type I secretion membrane fusion protein, HlyD, ABC-type-exporter         | transmembrane protein                                                        |
| 254780387 | 537021.9.peg.289 | C4-dicarboxylate transporter DctA                         | C4-dicarboxylate transport protein                                                                         | Na <sup>+</sup> /H <sup>+</sup> -dicarboxylate symporter                  | transmembrane protein                                                        |
| 254780388 | 537021.9.peg.290 | hypothetical protein                                      | hypothetical protein                                                                                       | von Willebrand factor type A fused with TadE/F involved in pilus assembly | transmembrane protein, but might be processed by cpaA and become periplasmic |
| 254780389 | 537021.9.peg.291 | hypothetical protein                                      | hypothetical protein                                                                                       | unknown                                                                   |                                                                              |
| 254780390 | 537021.9.peg.292 | nucleoside diphosphate kinase                             | Nucleoside diphosphate kinase (EC 2.7.4.6)                                                                 | nucleoside diphosphate kinase (EC 2.7.4.6)                                |                                                                              |
| 254780391 | 537021.9.peg.293 | DNA polymerase III subunit chi                            | DNA polymerase III chi subunit (EC 2.7.7.7)                                                                | DNA polymerase III subunit chi (EC 2.7.7.7)                               |                                                                              |
| 254780392 | 537021.9.peg.294 | leucyl aminopeptidase                                     | Cytosol aminopeptidase PepA (EC 3.4.11.1)                                                                  | leucyl aminopeptidase (EC 3.4.11.1)                                       |                                                                              |
| 255764468 | 537021.9.peg.295 | permease protein                                          | hypothetical protein                                                                                       | ABC-type exporter for lipopolysaccharide, transmembrane component         | transmembrane protein                                                        |
| 255764469 | 537021.9.peg.296 | putative permease protein                                 | putative permease protein                                                                                  | ABC-type exporter for lipopolysaccharide, transmembrane component         | transmembrane protein                                                        |
| 254780395 | 537021.9.peg.297 | organic solvent tolerance protein                         | Outer membrane protein Imp, required for envelope biogenesis / Organic solvent tolerance protein precursor | ABC-type exporter for lipopolysaccharide, auxiliary component             | has signal peptide                                                           |
| 254780396 | 537021.9.peg.299 | peptidyl-prolyl cis-trans isomerase protein               | Survival protein SurA precursor (Peptidyl-prolyl cis-trans isomerase SurA) (EC 5.2.1.8)                    | peptidyl-prolyl cis-trans isomerase protein (EC 5.2.1.8)                  | has signal peptide                                                           |
| 254780397 | 537021.9.peg.300 | 4-hydroxythreonine-4-phosphate dehydrogenase              | 4-hydroxythreonine-4-phosphate dehydrogenase (EC 1.1.1.262)                                                | 4-hydroxythreonine-4-phosphate dehydrogenase (EC 1.1.1.262)               |                                                                              |
| 254780398 | 537021.9.peg.301 | dimethyladenosine transferase                             | Dimethyladenosine transferase (EC 2.1.1.-)                                                                 | dimethyladenosine transferase (EC 2.1.1.-)                                |                                                                              |
| 254780399 | 537021.9.peg.302 | DNA mismatch repair protein                               | DNA mismatch repair protein MutL                                                                           | DNA mismatch repair protein                                               |                                                                              |
| 254780400 | 537021.9.peg.303 | hypothetical protein                                      | hypothetical protein                                                                                       | unknown                                                                   |                                                                              |
| 254780401 | 537021.9.peg.304 | tetraacyldisaccharide 4'-kinase                           | Tetraacyldisaccharide 4'-kinase (EC 2.7.1.130)                                                             | tetraacyldisaccharide 4'-kinase (EC 2.7.1.130)                            | transmembrane protein                                                        |
| 254780402 | 537021.9.peg.305 | 3-deoxy-D-manno-octulosonic-acid transferase              | 3-deoxy-D-manno-octulosonic-acid transferase (EC 2.-.-.-)                                                  | 3-deoxy-D-manno-octulosonic-acid transferase (EC 2.-.-.-)                 | transmembrane protein                                                        |
| 254780403 | 537021.9.peg.306 | hypothetical protein                                      | Uncharacterized protein, Bsl7517 homolog                                                                   | unknown                                                                   |                                                                              |
| 254780404 | 537021.9.peg.307 | inositol monophosphatase family protein                   | FIG043197: Inositol monophosphatase family protein                                                         | inositol monophosphatase family protein                                   |                                                                              |
| 254780405 | 537021.9.peg.308 | hypothetical protein                                      | hypothetical protein                                                                                       | N6-adenine-specific methylase (EC 2.1.1.-)                                |                                                                              |
| 254780406 | 537021.9.peg.309 | putative ribosomal large subunit pseudouridine synthase B | Ribosomal large subunit pseudouridine synthase B (EC 4.2.1.70) LSU Psi2605                                 | ribosomal large subunit pseudouridine synthase B (EC 4.2.1.70)            |                                                                              |
| 254780407 | 537021.9.peg.310 | hypothetical protein                                      | hypothetical protein                                                                                       | unknown                                                                   |                                                                              |
| 254780408 | 537021.9.peg.311 | hypothetical protein                                      | hypothetical protein                                                                                       | unknown                                                                   |                                                                              |

|           |                  |                                                      |                                                                                                 |                                                                                               |                                                                                                                                        |
|-----------|------------------|------------------------------------------------------|-------------------------------------------------------------------------------------------------|-----------------------------------------------------------------------------------------------|----------------------------------------------------------------------------------------------------------------------------------------|
| 254780409 | 537021.9.peg.312 | ribose-phosphate pyrophosphokinase                   | Ribose-phosphate pyrophosphokinase (EC 2.7.6.1)                                                 | ribose-phosphate pyrophosphokinase (EC 2.7.6.1)                                               |                                                                                                                                        |
| 254780410 | 537021.9.peg.313 | hypothetical protein                                 | COG1565: Uncharacterized conserved protein                                                      | unknown                                                                                       |                                                                                                                                        |
| 254780411 | 537021.9.peg.314 | prolipoprotein diacylglyceryl transferase            | Prolipoprotein diacylglyceryl transferase (EC 2.4.99.-)                                         | prolipoprotein diacylglyceryl transferase (EC 2.4.99.-)                                       | transmembrane protein                                                                                                                  |
| 254780412 | 537021.9.peg.315 | hypothetical protein                                 | hypothetical protein                                                                            | unknown                                                                                       |                                                                                                                                        |
| 254780413 | 537021.9.peg.316 | PAS/PAC sensor signal transduction histidine kinase  | Sensory box histidine kinase                                                                    | Signal transduction histidine kinase                                                          |                                                                                                                                        |
| 254780414 | 537021.9.peg.317 | GMP synthase                                         | GMP synthase [glutamine-hydrolyzing] (EC 6.3.5.2)                                               | GMP synthase (EC 6.3.5.2)                                                                     |                                                                                                                                        |
| 255764470 | 537021.9.peg.318 | integral membrane protein TerC                       | CBS domain protein                                                                              | integral membrane protein TerC + TlyC, Hemolysins and related proteins containing CBS domains | transmembrane protein                                                                                                                  |
| 254780416 | 537021.9.peg.319 | putative ferredoxin protein                          | 4Fe-4S ferredoxin, iron-sulfur binding                                                          | putative ferredoxin protein                                                                   |                                                                                                                                        |
| 254780417 | 537021.9.peg.320 | transcriptional regulator CarD family protein        | CarD-like transcriptional regulator                                                             | transcriptional regulator CarD family protein                                                 |                                                                                                                                        |
| 254780418 | 537021.9.peg.321 | 50S ribosomal protein L25/general stress protein Ctc | LSU ribosomal protein L25p                                                                      | 50S ribosomal protein L25/general stress protei                                               |                                                                                                                                        |
| 254780419 | 537021.9.peg.322 | aspartyl-tRNA synthetase                             | Aspartyl-tRNA synthetase (EC 6.1.1.12), Aspartyl-tRNA(Asn) synthetase (EC 6.1.1.23) unambiguous | aspartyl-tRNA synthetase (EC 6.1.1.12)                                                        |                                                                                                                                        |
| 254780420 | 537021.9.peg.323 | carbamoyl phosphate synthase small subunit           | Carbamoyl-phosphate synthase small chain (EC 6.3.5.5)                                           | carbamoyl phosphate synthase small subunit (EC 6.3.5.5)                                       |                                                                                                                                        |
| 254780421 | 537021.9.peg.324 | hypothetical protein                                 | hypothetical protein                                                                            | unknown                                                                                       | transmembrane protein                                                                                                                  |
| 255764471 | 537021.9.peg.325 | GTP-binding protein EngA                             | GTP-binding protein EngA                                                                        | GTP-binding protein EngA                                                                      |                                                                                                                                        |
| 254780423 | 537021.9.peg.326 | S-adenosylmethionine synthetase                      | S-adenosylmethionine synthetase (EC 2.5.1.6)                                                    | S-adenosylmethionine synthetase (EC 2.5.1.6)                                                  |                                                                                                                                        |
| 254780424 | 537021.9.peg.327 | transcriptional regulator protein                    | Predicted transcriptional regulator                                                             | transcriptional regulator protein                                                             |                                                                                                                                        |
| 254780425 | 537021.9.peg.328 | apolipoprotein N-acyltransferase                     | Apolipoprotein N-acyltransferase (EC 2.3.1.-) / Copper homeostasis protein CutE                 | apolipoprotein N-acyltransferase (EC 2.3.1.-)                                                 | transmembrane protein                                                                                                                  |
| 254780426 | 537021.9.peg.329 | hemolysin protein                                    | Magnesium and cobalt efflux protein CorC                                                        | hemolysin protein, transporter associated protein                                             |                                                                                                                                        |
| 254780427 | 537021.9.peg.331 | hypothetical protein                                 | FIG000233: metal-dependent hydrolase                                                            | metal binding protein                                                                         |                                                                                                                                        |
| 255764472 | 537021.9.peg.332 | 2-methylthioadenine synthetase (miaB-like) protein   | tRNA-i(6)A37 methylthiotransferase                                                              | 2-methylthioadenine synthetase                                                                |                                                                                                                                        |
| 254780429 | 537021.9.peg.333 | hypothetical protein                                 | Inactive homolog of metal-dependent proteases, putative molecular chaperone                     | metal-dependant protease                                                                      |                                                                                                                                        |
| 254780430 | 537021.9.peg.334 | nitrogen fixation protein                            | NifU protein                                                                                    | Nfu/NifU protein, may involve in formation of Fe-S cluster                                    |                                                                                                                                        |
| 254780431 | 537021.9.peg.335 | hypothetical protein                                 | hypothetical protein                                                                            | cell cycle regulator                                                                          |                                                                                                                                        |
| 254780432 | 537021.9.peg.336 | acetylornithine transaminase protein                 | Acetylornithine aminotransferase (EC 2.6.1.11)                                                  | acetylornithine transaminase protein (EC 2.6.1.11)                                            |                                                                                                                                        |
| 255764473 | 537021.9.peg.337 | ornithine carbamoyltransferase                       | Ornithine carbamoyltransferase (EC 2.1.3.3)                                                     | ornithine carbamoyltransferase (EC 2.1.3.3)                                                   |                                                                                                                                        |
| 254780434 | 537021.9.peg.338 | dihydroorotate dehydrogenase 2                       | Dihydroorotate dehydrogenase (EC 1.3.3.1)                                                       | dihydroorotate dehydrogenase (EC 1.3.3.1)                                                     |                                                                                                                                        |
| 254780435 | 537021.9.peg.339 | peptidase S11, D-alanyl-D-alanine carboxypeptidase 1 | D-alanyl-D-alanine carboxypeptidase (EC 3.4.16.4)                                               | D-alanyl-D-alanine carboxypeptidase (EC 3.4.16.4)                                             | has signal peptide                                                                                                                     |
| 254780436 | 537021.9.peg.340 | hypothetical protein                                 | hypothetical protein                                                                            | unknown                                                                                       | transmembrane protein                                                                                                                  |
| 254780437 | 537021.9.peg.341 | 30S ribosomal protein S21                            | SSU ribosomal protein S21p                                                                      | 30S ribosomal protein S21                                                                     | should be mapped to ribosome pathway in KEGG... maybe the start point is wrong... if not wrong, rosetta may help predict the fix helix |
| 254780438 | 537021.9.peg.342 | pyridoxine 5'-phosphate synthase                     | Pyridoxine 5'-phosphate synthase (EC 2.6.99.2)                                                  | pyridoxine 5'-phosphate synthase (EC 2.6.99.2)                                                |                                                                                                                                        |
| 254780439 | 537021.9.peg.343 | carbamoyl phosphate synthase large subunit           | Carbamoyl-phosphate synthase large chain (EC 6.3.5.5)                                           | carbamoyl phosphate synthase large subunit (EC 6.3.5.5)                                       |                                                                                                                                        |
| 254780440 | 537021.9.peg.344 | transcription elongation factor GreA                 | Transcription elongation factor GreA                                                            | transcription elongation factor GreA                                                          |                                                                                                                                        |
| 255764474 | 537021.9.peg.345 | glycosyl transferase group 1                         | Glycosyltransferase                                                                             | glycosyl transferase                                                                          |                                                                                                                                        |
| 254780442 | 537021.9.peg.346 | pyruvate kinase                                      | Pyruvate kinase (EC 2.7.1.40)                                                                   | pyruvate kinase (EC 2.7.1.40)                                                                 |                                                                                                                                        |
| 254780443 | 537021.9.peg.347 | hypothetical protein                                 | conserved hypothetical protein                                                                  | unknown                                                                                       | has signal peptide                                                                                                                     |
| 254780444 | 537021.9.peg.350 | bacteriophage repressor protein C1                   | Phage repressor                                                                                 | transcriptional regulator, phage repressor                                                    |                                                                                                                                        |
| 254780445 | 537021.9.peg.351 | isoleucyl-tRNA synthetase                            | Isoleucyl-tRNA synthetase (EC 6.1.1.5)                                                          | isoleucyl-tRNA synthetase (EC 6.1.1.5)                                                        |                                                                                                                                        |
| 254780446 | 537021.9.peg.352 | hypothetical protein                                 | hypothetical protein                                                                            | unknown                                                                                       |                                                                                                                                        |
| 254780448 | 537021.9.peg.353 | hypothetical protein                                 | hypothetical protein                                                                            | unknown                                                                                       | transmembrane protein                                                                                                                  |



|           |                  |                                                                         |                                                                    |                                                                 |                       |
|-----------|------------------|-------------------------------------------------------------------------|--------------------------------------------------------------------|-----------------------------------------------------------------|-----------------------|
| 254780449 | 537021.9.peg.354 | hypothetical protein                                                    | hypothetical protein                                               | unknown                                                         |                       |
| 254780450 | 537021.9.peg.355 | two-component sensor histidine kinase/response regulator hybrid protein | Sensory box histidine kinase/response regulator                    | two-component sensor histidine kinase/respons                   | transmembrane protein |
| 254780451 | 537021.9.peg.356 | aconitate hydratase                                                     | Aconitate hydratase (EC 4.2.1.3)                                   | aconitate hydratase (EC 4.2.1.3)                                |                       |
| 254780452 | 537021.9.peg.357 | hypothetical protein                                                    | FIG005935: membrane protein                                        | unknown                                                         | transmembrane protein |
| 254780453 | 537021.9.peg.358 | orotidine 5'-phosphate decarboxylase                                    | Orotidine 5'-phosphate decarboxylase (EC 4.1.1.23)                 | orotidine 5'-phosphate decarboxylase (EC 4.1.1.23)              |                       |
| 254780454 | 537021.9.peg.359 | DNA polymerase III subunit beta                                         | DNA polymerase III beta subunit (EC 2.7.7.7)                       | DNA polymerase III subunit beta (EC 2.7.7.7)                    |                       |
| 254780455 | 537021.9.peg.361 | nicotinate phosphoribosyltransferase                                    | Nicotinate phosphoribosyltransferase (EC 2.4.2.11)                 | nicotinate phosphoribosyltransferase (EC 2.4.2.11)              |                       |
| 254780456 | 537021.9.peg.362 | 30S ribosomal protein S1                                                | SSU ribosomal protein S1p                                          | 30S ribosomal protein S1                                        |                       |
| 254780457 | 537021.9.peg.364 | cytidylate kinase                                                       | Cytidylate kinase (EC 2.7.4.14)                                    | cytidylate kinase (EC 2.7.4.14)                                 |                       |
| 254780458 | 537021.9.peg.365 | 3-phosphoshikimate 1-carboxyvinyltransferase                            | 5-Enolpyruvylshikimate-3-phosphate synthase (EC 2.5.1.19)          | 3-phosphoshikimate 1-carboxyvinyltransferase (EC 2.5.1.19)      |                       |
| 254780459 | 537021.9.peg.366 | hypothetical protein                                                    | hypothetical protein                                               | unknown                                                         |                       |
| 254780460 | 537021.9.peg.367 | 3-hydroxydecanoyl-(acyl carrier protein) dehydratase                    | 3-hydroxydecanoyl-[acyl-carrier-protein] dehydratase (EC 4.2.1.60) | 3-hydroxydecanoyl-(acyl carrier protein) synthase (EC 2.3.1.41) |                       |
| 254780461 | 537021.9.peg.368 | 3-oxoacyl-(acyl carrier protein) synthase I                             | 3-oxoacyl-[acyl-carrier-protein] synthase, KASI (EC 2.3.1.41)      | 3-oxoacyl-(acyl carrier protein) synthase I (EC 2.3.1.41)       |                       |
| 254780462 | 537021.9.peg.369 | enoyl-(acyl carrier protein) reductase                                  | Enoyl-[acyl-carrier-protein] reductase [NADH] (EC 1.3.1.9)         | enoyl-(acyl carrier protein) reductase (EC 1.3.1.9)             |                       |
| 254780463 | 537021.9.peg.370 | putative peptidoglycan binding protein                                  | putative hemagglutinin protein                                     | unknown                                                         | transmembrane protein |
| 254780464 | 537021.9.peg.371 | M16 family peptidase                                                    | Mitochondrial processing peptidase-like protein (EC 3.4.24.64)     | Zn-dependent peptidases (EC 3.4.24.64)                          |                       |
| 254780465 | 537021.9.peg.372 | threonine synthase                                                      | Threonine synthase (EC 4.2.3.1)                                    | threonine synthase (EC 4.2.3.1)                                 |                       |
| 254780466 | 537021.9.peg.373 | putative modification methylase                                         | DNA modification methyltransferase (EC 2.1.1.-)                    | DNA modification methylase (EC 2.1.1.-)                         |                       |
| 254780467 | 537021.9.peg.375 | exodeoxyribonuclease VII small subunit                                  | Exodeoxyribonuclease VII small subunit (EC 3.1.11.6)               | exodeoxyribonuclease VII small subunit (EC 3.1.11.6)            |                       |
| 254780468 | 537021.9.peg.376 | sensory box/GGDEF family protein                                        | Sensory box/GGDEF domain/EAL domain protein                        | signal transduction protein                                     | transmembrane protein |
| 254780469 | 537021.9.peg.377 | zinc-binding protein                                                    | hypothetical protein                                               | zinc-finger                                                     |                       |
| 254780470 | 537021.9.peg.378 | translation initiation factor IF-1                                      | Translation initiation factor 1                                    | translation initiation factor IF-1                              |                       |
| 254780471 | 537021.9.peg.379 | cytochrome o ubiquinol oxidase subunit IV                               | Cytochrome O ubiquinol oxidase subunit IV (EC 1.10.3.-)            | cytochrome o ubiquinol oxidase subunit IV (EC 1.10.3.-)         | transmembrane protein |
| 254780472 | 537021.9.peg.380 | cytochrome o ubiquinol oxidase subunit III                              | Cytochrome O ubiquinol oxidase subunit III (EC 1.10.3.-)           | cytochrome o ubiquinol oxidase subunit III (EC 1.10.3.-)        | transmembrane protein |
| 254780473 | 537021.9.peg.381 | cytochrome O ubiquinol oxidase subunit I                                | Cytochrome O ubiquinol oxidase subunit I (EC 1.10.3.-)             | cytochrome O ubiquinol oxidase subunit I (EC 1.10.3.-)          | transmembrane protein |
| 254780474 | 537021.9.peg.382 | ubiquinol oxidase, subunit II                                           | Cytochrome O ubiquinol oxidase subunit II (EC 1.10.3.-)            | ubiquinol oxidase, subunit II (EC 1.10.3.-)                     | transmembrane protein |
| 254780475 | 537021.9.peg.383 | 50S ribosomal protein L33                                               | LSU ribosomal protein L33p                                         | 50S ribosomal protein L33                                       |                       |
| 254780476 | 537021.9.peg.384 | two component response regulator                                        | PUTATIVE 2-COMPONENT RECEIVER DOMAIN PROTEIN                       | two component response regulator                                |                       |
| 254780477 | 537021.9.peg.385 | DSBA oxidoreductase                                                     | Periplasmic thiol:disulfide interchange protein Dsba               | DSBA oxidoreductase                                             | has signal peptide    |
| 254780478 | 537021.9.peg.386 | hypothetical protein                                                    | Argininosuccinate synthase                                         | unknown                                                         |                       |
| 254780479 | 537021.9.peg.387 | A/G-specific adenine glycosylase                                        | A/G-specific adenine glycosylase (EC 3.2.2.-)                      | A/G-specific adenine glycosylase (EC 3.2.2.-)                   |                       |
| 254780480 | 537021.9.peg.388 | 2'-deoxycytidine 5'-triphosphate deaminase                              | Deoxycytidine triphosphate deaminase (EC 3.5.4.13)                 | 2'-deoxycytidine 5'-triphosphate deaminase (EC 3.5.4.13)        |                       |
| 254780481 | 537021.9.peg.389 | 50S ribosomal protein L34                                               | hypothetical protein                                               | 50S ribosomal protein L34                                       |                       |
| 254780482 | 537021.9.peg.390 | ribonuclease P                                                          | Ribonuclease P protein component (EC 3.1.26.5)                     | ribonuclease P (EC 3.1.26.5)                                    |                       |
| 254780483 | 537021.9.peg.391 | putative inner membrane protein translocase component YidC              | Inner membrane protein translocase component YidC, long form       | inner membrane protein translocase component YidC               | transmembrane protein |
| 254780484 | 537021.9.peg.392 | GTPase EngB                                                             | GTP-binding protein EngB                                           | GTPase EngB                                                     |                       |
| N/A       | 537021.9.peg.393 | N/A                                                                     | Acetylglutamate kinase (EC 2.7.2.8)                                | Acetylglutamate kinase                                          | 1/2 of the protein    |
| N/A       | 537021.9.peg.394 | N/A                                                                     | Acetylglutamate kinase (EC 2.7.2.8)                                | Acetylglutamate kinase                                          | 1/2 of the protein    |
| 254780485 | 537021.9.peg.395 | biotin synthase                                                         | Biotin synthase (EC 2.8.1.6)                                       | biotin synthase (EC 2.8.1.6)                                    |                       |
| 254780486 | 537021.9.peg.396 | 8-amino-7-oxononanoate synthase                                         | 8-amino-7-oxononanoate synthase (EC 2.3.1.47)                      | 8-amino-7-oxononanoate synthase (EC 2.3.1.47)                   |                       |
| 254780487 | 537021.9.peg.397 | dithiobiotin synthetase                                                 | Dethiobiotin synthetase (EC 6.3.3.3)                               | dithiobiotin synthetase (EC 6.3.3.3)                            |                       |
| 254780488 | 537021.9.peg.398 | adenosylmethionine--8-amino-7-oxononanoate                              | Adenosylmethionine-8-amino-7-oxononanoate                          | Adenosylmethionine-8-amino-7-oxononanoate                       |                       |

|           |                  |                                                                  |                                                                                                                                                    |                                                                  |                       |
|-----------|------------------|------------------------------------------------------------------|----------------------------------------------------------------------------------------------------------------------------------------------------|------------------------------------------------------------------|-----------------------|
|           |                  | transaminase                                                     | aminotransferase (EC 2.6.1.62)                                                                                                                     | aminotransferase (EC 2.6.1.62)                                   |                       |
| 254780489 | 537021.9.peg.399 | 3-oxoacyl-(acyl carrier protein) synthase II                     | Biotin synthesis protein bioZ                                                                                                                      | 3-oxoacyl-(acyl carrier protein) synthase II                     |                       |
| 254780490 | 537021.9.peg.400 | site-specific tyrosine recombinase XerC                          | probable integrase/recombinase protein                                                                                                             | site-specific tyrosine recombinase XerC                          |                       |
| 254780491 | 537021.9.peg.401 | Mrp protein                                                      | Mrp protein                                                                                                                                        | unknown                                                          |                       |
| 254780492 | N/A              | hypothetical protein                                             | N/A                                                                                                                                                | unknown                                                          |                       |
| 254780829 | 537021.9.peg.402 | ATP-dependent protease ATP-binding subunit                       | ATP-dependent hsl protease ATP-binding subunit HslU                                                                                                | ATP-dependent protease ATP-binding subunit                       |                       |
| 254780828 | 537021.9.peg.403 | ATP-dependent protease peptidase subunit                         | ATP-dependent protease HslV (EC 3.4.25.-)                                                                                                          | ATP-dependent protease peptidase subunit (EC 3.4.25.-)           |                       |
| 254780827 | 537021.9.peg.404 | pantothenate kinase                                              | Pantothenate kinase (EC 2.7.1.33)                                                                                                                  | pantothenate kinase (EC 2.7.1.33)                                |                       |
| 254780826 | 537021.9.peg.405 | phosphoenolpyruvate carboxykinase                                | Phosphoenolpyruvate carboxykinase [ATP] (EC 4.1.1.49)                                                                                              | phosphoenolpyruvate carboxykinase (EC 4.1.1.49)                  |                       |
| 255764476 | 537021.9.peg.406 | two-component sensor histidine kinase protein                    | FIG056333: sensor                                                                                                                                  | two-component sensor histidine kinase protein                    | transmembrane protein |
| 254780824 | 537021.9.peg.407 | hypothetical protein                                             | ATPase YjeE, predicted to have essential role in cell wall biosynthesis / COG3178: Predicted phosphotransferase related to Ser/Thr protein kinases | ATPase or kinase                                                 |                       |
| 254780823 | 537021.9.peg.408 | double-strand break repair protein AddB                          | FIG041266: ATP-dependent nuclease subunit B                                                                                                        | double-strand break repair protein AddB                          |                       |
| N/A       | 537021.9.peg.409 | N/A                                                              | FIG061771: ATP-dependent nuclease subunit A                                                                                                        | double-strand break repair helicase AddA                         | 1/2 of the protein    |
| N/A       | 537021.9.peg.410 | N/A                                                              | FIG061771: ATP-dependent nuclease subunit A                                                                                                        | double-strand break repair helicase AddA                         | 1/2 of the protein    |
| 254780822 | 537021.9.peg.411 | thioredoxin                                                      | Thioredoxin                                                                                                                                        | thioredoxin                                                      |                       |
| 254780821 | 537021.9.peg.412 | FolC bifunctional protein                                        | Dihydrofolate synthase (EC 6.3.2.12) / Folylpolyglutamate synthase (EC 6.3.2.17)                                                                   | FolC bifunctional protein                                        |                       |
| 254780820 | 537021.9.peg.413 | acetyl-CoA carboxylase subunit beta                              | Acetyl-coenzyme A carboxyl transferase beta chain (EC 6.4.1.2)                                                                                     | acetyl-CoA carboxylase subunit beta (EC 6.4.1.2)                 |                       |
| 255764477 | 537021.9.peg.415 | dephospho-CoA kinase                                             | Dephospho-CoA kinase (EC 2.7.1.24)                                                                                                                 | dephospho-CoA kinase (EC 2.7.1.24)                               |                       |
| 254780818 | 537021.9.peg.416 | DNA polymerase III subunit epsilon                               | DNA polymerase III epsilon subunit (EC 2.7.7.7)                                                                                                    | DNA polymerase III subunit epsilon (EC 2.7.7.7)                  |                       |
| 254780817 | 537021.9.peg.417 | preprotein translocase subunit SecB                              | Protein export cytoplasm chaperone protein (SecB, maintains protein to be exported in unfolded state)                                              | preprotein translocase subunit SecB                              |                       |
| 254780815 | 537021.9.peg.418 | hypothetical protein                                             | hypothetical protein                                                                                                                               | membrane associated transporter protein                          | transmembrane protein |
| 254780814 | 537021.9.peg.419 | DNA gyrase subunit B                                             | DNA gyrase subunit B (EC 5.99.1.3)                                                                                                                 | DNA gyrase subunit B (EC 5.99.1.3)                               |                       |
| 254780813 | 537021.9.peg.420 | Maf-like protein                                                 | Maf/YceF/YhdE family protein                                                                                                                       | Maf-like protein, cell cycle control                             |                       |
| 254780812 | 537021.9.peg.421 | uroporphyrinogen decarboxylase                                   | Uroporphyrinogen III decarboxylase (EC 4.1.1.37)                                                                                                   | uroporphyrinogen decarboxylase (EC 4.1.1.37)                     |                       |
| 254780811 | 537021.9.peg.422 | hypothetical protein                                             | Hypothetical membrane protein, possible involvement in cytochrome functioning/assembly                                                             | unknown                                                          | transmembrane protein |
| 254780810 | 537021.9.peg.424 | transcription termination factor Rho                             | Transcription termination factor Rho                                                                                                               | transcription termination factor Rho                             |                       |
| 254780809 | 537021.9.peg.425 | tRNA modification GTPase TrmE                                    | GTPase and tRNA-U34 5-formylation enzyme TrmE                                                                                                      | tRNA modification GTPase TrmE                                    |                       |
| 254780808 | 537021.9.peg.426 | tRNA uridine 5-carboxymethylaminomethyl modification enzyme GidA | tRNA uridine 5-carboxymethylaminomethyl modification enzyme GidA                                                                                   | tRNA uridine 5-carboxymethylaminomethyl modification enzyme GidA |                       |
| 254780807 | 537021.9.peg.427 | glucose-inhibited division protein B                             | probable glucose inhibited division protein B                                                                                                      | glucose-inhibited division protein B                             |                       |
| 254780806 | 537021.9.peg.428 | chromosome partitioning protein A                                | Chromosome (plasmid) partitioning protein ParA / Sporulation initiation inhibitor protein Soj                                                      | chromosome partitioning protein A                                |                       |
| 254780805 | 537021.9.peg.429 | chromosome partitioning protein B                                | Chromosome (plasmid) partitioning protein ParB / Stage 0 sporulation protein J                                                                     | chromosome partitioning protein B                                |                       |
| 254780804 | 537021.9.peg.430 | DNA polymerase III subunit delta                                 | DNA polymerase III delta subunit (EC 2.7.7.7)                                                                                                      | DNA polymerase III subunit delta (EC 2.7.7.7)                    |                       |
| 254780803 | 537021.9.peg.431 | hypothetical protein                                             | hypothetical protein                                                                                                                               | unknown                                                          | transmembrane protein |
| 254780802 | 537021.9.peg.432 | leucyl-tRNA synthetase                                           | Leucyl-tRNA synthetase (EC 6.1.1.4)                                                                                                                | leucyl-tRNA synthetase (EC 6.1.1.4)                              |                       |
| 254780801 | 537021.9.peg.433 | hypothetical protein                                             | Hypothetical protein YggS, proline synthase co-transcribed bacterial homolog PROSC                                                                 | enzyme of TIM barrel fold                                        |                       |
| 254780800 | 537021.9.peg.434 | hypothetical protein                                             | hypothetical protein                                                                                                                               | unknown                                                          |                       |
| 254780799 | 537021.9.peg.435 | DNA translocase FtsK                                             | Cell division protein FtsK                                                                                                                         | DNA translocase FtsK                                             | transmembrane protein |
| 254780798 | 537021.9.peg.436 | possible lola type protein                                       | outer membrane lipoprotein carrier protein LolA                                                                                                    | ABC transporter for lipoprotein, auxiliary component             | has signal peptide    |
| 254780797 | 537021.9.peg.437 | hypothetical protein                                             | hypothetical protein                                                                                                                               | Exonuclease III                                                  |                       |
| 254780796 | 537021.9.peg.438 | ribonuclease H                                                   | Ribonuclease HI (EC 3.1.26.4)                                                                                                                      | ribonuclease H (EC 3.1.26.4)                                     |                       |
| 254780795 | 537021.9.peg.439 | homoserine kinase                                                | Homoserine kinase (EC 2.7.1.39)                                                                                                                    | homoserine kinase (EC 2.7.1.39)                                  |                       |
| 254780794 | 537021.9.peg.440 | tryptophanyl-tRNA synthetase                                     | Tryptophanyl-tRNA synthetase (EC 6.1.1.2)                                                                                                          | tryptophanyl-tRNA synthetase (EC 6.1.1.2)                        |                       |
| 254780793 | 537021.9.peg.441 | integral membrane protein MviN                                   | hypothetical protein                                                                                                                               | integral membrane protein MviN                                   | transmembrane protein |

|           |                  |                                                                  |                                                                                             |                                                                                 |                                           |
|-----------|------------------|------------------------------------------------------------------|---------------------------------------------------------------------------------------------|---------------------------------------------------------------------------------|-------------------------------------------|
| 255764478 | 537021.9.peg.442 | aminopeptidase protein                                           | Aminopeptidase S (Leu, Val, Phe, Tyr preference) (EC 3.4.11.24)                             | aminopeptidase protein (EC 3.4.11.24)                                           |                                           |
| 254780791 | 537021.9.peg.443 | exodeoxyribonuclease VII large subunit                           | Exodeoxyribonuclease VII large subunit (EC 3.1.11.6)                                        | exodeoxyribonuclease VII large subunit                                          |                                           |
| 254780790 | N/A              | hypothetical protein                                             | N/A                                                                                         | unknown                                                                         | transmembrane protein                     |
| 254780789 | 537021.9.peg.444 | hypothetical protein                                             | COG0779: clustered with transcription termination protein NusA                              | unknown                                                                         |                                           |
| 254780788 | 537021.9.peg.445 | transcription elongation factor NusA                             | Transcription termination protein NusA                                                      | transcription elongation/termination factor NusA                                |                                           |
| 254780787 | 537021.9.peg.446 | translation initiation factor IF-2                               | Translation initiation factor 2                                                             | translation initiation factor IF-2                                              |                                           |
| 254780786 | 537021.9.peg.447 | ribosome-binding factor A                                        | Ribosome-binding factor A                                                                   | ribosome-binding factor A                                                       |                                           |
| 254780785 | 537021.9.peg.448 | 30S ribosomal protein S15                                        | SSU ribosomal protein S15p (S13e)                                                           | 30S ribosomal protein S15                                                       |                                           |
| 254780784 | 537021.9.peg.449 | polynucleotide phosphorylase/polyadenylase                       | Polyribonucleotide nucleotidyltransferase (EC 2.7.7.8)                                      | polynucleotide phosphorylase/polyadenylase (EC 2.7.7.8)                         |                                           |
| 254780783 | 537021.9.peg.450 | transcription regulator protein                                  | TRANSCRIPTION REGULATOR PROTEIN                                                             | ROS/MUCR transcription regulator                                                |                                           |
| 255764479 | 537021.9.peg.452 | hypothetical protein                                             | hypothetical protein                                                                        | unknown                                                                         |                                           |
| 254780782 | 537021.9.peg.451 | succinyl-diaminopimelate desuccinylase                           | N-succinyl-L,L-diaminopimelate desuccinylase (EC 3.5.1.18)                                  | succinyl-diaminopimelate desuccinylase (EC 3.5.1.18)                            |                                           |
| 254780781 | 537021.9.peg.453 | 2,3,4,5-tetrahydropyridine-2,6-carboxylate N-succinyltransferase | 2,3,4,5-tetrahydropyridine-2,6-dicarboxylate N-succinyltransferase (EC 2.3.1.117)           | 2,3,4,5-tetrahydropyridine-2,6-carboxylate N-succinyltransferase (EC 2.3.1.117) |                                           |
| 254780780 | 537021.9.peg.454 | histidine triad (HIT) protein                                    | histidine triad (HIT) protein                                                               | HIT family hydrolyase involve in cell cycle                                     |                                           |
| 254780779 | 537021.9.peg.456 | 30S ribosomal protein S2                                         | SSU ribosomal protein S2p (SAe)                                                             | 30S ribosomal protein S2                                                        |                                           |
| 254780778 | 537021.9.peg.457 | elongation factor Ts                                             | Translation elongation factor Ts                                                            | elongation factor Ts                                                            |                                           |
| 254780777 | 537021.9.peg.458 | uridylate kinase                                                 | Uridylate kinase (EC 2.7.4.-)                                                               | uridylate kinase (EC 2.7.4.-)                                                   |                                           |
| 254780776 | 537021.9.peg.459 | ribosome recycling factor                                        | Ribosome recycling factor                                                                   | ribosome recycling factor                                                       |                                           |
| 254780775 | 537021.9.peg.460 | undecaprenyl diphosphate synthase                                | Undecaprenyl pyrophosphate synthetase (EC 2.5.1.31)                                         | undecaprenyl diphosphate synthase (EC 2.5.1.31)                                 |                                           |
| 254780774 | 537021.9.peg.461 | phosphatidate cytidyltransferase protein                         | Phosphatidate cytidyltransferase (EC 2.7.7.41)                                              | phosphatidate cytidyltransferase protein (EC 2.7.7.41)                          | transmembrane protein                     |
| 254780773 | 537021.9.peg.462 | zinc metallopeptidase                                            | Membrane-associated zinc metalloprotease                                                    | membrane-associated Zn-dependent protease                                       | transmembrane protein                     |
| 254780772 | 537021.9.peg.463 | surface antigen (D15)                                            | Outer membrane protein assembly factor YaeT precursor                                       | YaeT in YaeT/YfiO complex for assembling proteins into outer membrane           | has signal peptide                        |
| 254780771 | 537021.9.peg.464 | UDP-3-O-[3-hydroxymyristoyl] glucosamine N-acyltransferase       | UDP-3-O-[3-hydroxymyristoyl] glucosamine N-acyltransferase (EC 2.3.1.-)                     | UDP-3-O-[3-hydroxymyristoyl] glucosamine N-acyltransferase (EC 2.3.1.-)         |                                           |
| 254780770 | 537021.9.peg.465 | (3R)-hydroxymyristoyl-ACP dehydratase                            | (3R)-hydroxymyristoyl-[acyl carrier protein] dehydratase (EC 4.2.1.-)                       | (3R)-hydroxymyristoyl-ACP dehydratase (EC 4.2.1.-)                              |                                           |
| 255764481 | 537021.9.peg.466 | UDP-N-acetylglucosamine acyltransferase                          | Acyl-[acyl-carrier-protein]-UDP-N-acetylglucosamine O-acyltransferase (EC 2.3.1.129)        | UDP-N-acetylglucosamine acyltransferase (EC 2.3.1.129)                          |                                           |
| 254780768 | 537021.9.peg.467 | hypothetical protein                                             | Protein of unknown function DUF1009 clustered with KDO2-Lipid A biosynthesis genes          | unknown                                                                         |                                           |
| 254780767 | 537021.9.peg.468 | lipid-A-disaccharide synthase                                    | Lipid-A-disaccharide synthase (EC 2.4.1.182)                                                | lipid-A-disaccharide synthase (EC 2.4.1.182)                                    |                                           |
| 254780766 | 537021.9.peg.469 | recombination protein F                                          | DNA recombination and repair protein RecF                                                   | DNA recombination protein F, RecF                                               |                                           |
| 254780765 | 537021.9.peg.470 | 3-deoxy-manno-octulosonate cytidyltransferase                    | 3-deoxy-manno-octulosonate cytidyltransferase (EC 2.7.7.38)                                 | 3-deoxy-manno-octulosonate cytidyltransferase (EC 2.7.7.38)                     |                                           |
| 254780764 | 537021.9.peg.471 | hypothetical protein                                             | hypothetical protein                                                                        | signal transduction protein                                                     | has signal peptide                        |
| N/A       | 537021.9.peg.472 | N/A                                                              | DNA polymerase III subunits gamma and tau (EC 2.7.7.7)                                      | DNA polymerase III subunits gamma and tau                                       | 1/2 of the protein                        |
| N/A       | 537021.9.peg.473 | N/A                                                              | hypothetical protein                                                                        | DNA polymerase III subunits gamma and tau                                       | 1/2 of the protein                        |
| 254780763 | 537021.9.peg.474 | hypothetical protein                                             | FIG000557: hypothetical protein                                                             | unknown                                                                         |                                           |
| 254780762 | 537021.9.peg.475 | recombination protein RecR                                       | Recombination protein RecR                                                                  | recombination protein RecR                                                      |                                           |
| N/A       | 537021.9.peg.476 | N/A                                                              | virulence factor MviN-like protein                                                          | integral membrane protein MviN                                                  | transmembrane protein, 1/2 of the protein |
| N/A       | 537021.9.peg.477 | N/A                                                              | virulence factor MviN homolog                                                               | integral membrane protein MviN                                                  | transmembrane protein, 1/2 of the protein |
| 254780761 | 537021.9.peg.478 | probable FAD-dependent oxidoreductase protein                    | D-2-hydroxyglutarate dehydrogenase                                                          | glycolate oxidase subunit GlcD                                                  |                                           |
| 254780760 | 537021.9.peg.479 | hypothetical protein                                             | YrdC/Sua5 family protein, required for threonylcarbamoyladenosine (t(6)A) formation in tRNA | translational regulation protein                                                |                                           |
| 254780759 | 537021.9.peg.480 | hypothetical protein                                             | hypothetical protein                                                                        | unknown                                                                         | has signal peptide                        |

|           |                  |                                                     |                                                                                                                                                                                                                      |                                                                       |                                                                              |
|-----------|------------------|-----------------------------------------------------|----------------------------------------------------------------------------------------------------------------------------------------------------------------------------------------------------------------------|-----------------------------------------------------------------------|------------------------------------------------------------------------------|
| 254780758 | 537021.9.peg.481 | hypothetical protein                                | Hypothetical metal-binding enzyme, YcbL homolog                                                                                                                                                                      | zn-depedent hydrolase                                                 |                                                                              |
| 254780757 | 537021.9.peg.482 | glycyl-tRNA synthetase subunit alpha                | Glycyl-tRNA synthetase alpha chain (EC 6.1.1.14)                                                                                                                                                                     | glycyl-tRNA synthetase subunit alpha (EC 6.1.1.14)                    |                                                                              |
| 255764482 | 537021.9.peg.483 | methyltransferase protein                           | COG4123: Predicted O-methyltransferase                                                                                                                                                                               | O-methyltransferase                                                   |                                                                              |
| 254780755 | 537021.9.peg.484 | octaprenyl-diphosphate synthase protein             | Octaprenyl-diphosphate synthase (EC 2.5.1.-) / Dimethylallyltransferase (EC 2.5.1.1) / Geranyltranstransferase (farnesylidiphosphate synthase) (EC 2.5.1.10) / Geranylgeranyl pyrophosphate synthetase (EC 2.5.1.29) | octaprenyl-diphosphate synthase protein (EC 2.5.1.-)                  |                                                                              |
| 254780754 | 537021.9.peg.485 | inorganic polyphosphate/ATP-NAD kinase              | NAD kinase (EC 2.7.1.23)                                                                                                                                                                                             | inorganic polyphosphate/ATP-NAD kinase (EC 2.7.1.23)                  |                                                                              |
| 254780753 | 537021.9.peg.486 | peptide chain release factor 2                      | Peptide chain release factor 2; programmed frameshift-containing                                                                                                                                                     | peptide chain release factor 2                                        |                                                                              |
| 254780752 | 537021.9.peg.487 | penicillin binding peptidoglycan synthetase protein | Multimodular transpeptidase-transglycosylase (EC 2.4.1.129) (EC 3.4.-.-)                                                                                                                                             | penicillin binding peptidoglycan synthetase (EC 2.4.1.-) (EC 3.4.-.-) | transmembrane protein                                                        |
| 254780751 | 537021.9.peg.488 | ribonuclease E                                      | Cytoplasmic axial filament protein CafA and Ribonuclease G (EC 3.1.4.-)                                                                                                                                              | ribonuclease E                                                        |                                                                              |
| 254780750 | 537021.9.peg.489 | DNA mismatch repair protein                         | DNA mismatch repair protein MutS                                                                                                                                                                                     | DNA mismatch repair protein, MutS                                     |                                                                              |
| 254780749 | 537021.9.peg.490 | lipoprotein signal peptidase transmembrane          | Lipoprotein signal peptidase (EC 3.4.23.36)                                                                                                                                                                          | Lipoprotein signal peptidase (EC 3.4.23.36)                           | transmembrane protein                                                        |
| 254780748 | 537021.9.peg.491 | integration host factor, beta subunit               | Integration host factor beta subunit                                                                                                                                                                                 | integration host factor, beta subunit                                 |                                                                              |
| 254780747 | 537021.9.peg.492 | putative protease IV transmembrane protein          | macromolecule metabolism; macromolecule degradation; degradation of proteins, peptides, glycopeptides                                                                                                                | protease IV transmembrane protein                                     | has signal peptide                                                           |
| 254780746 | 537021.9.peg.494 | hypothetical protein                                | hypothetical protein                                                                                                                                                                                                 | outer membrane protein, involve in lipopolysaccharide export          | transmembrane protein                                                        |
| 254780745 | 537021.9.peg.495 | OstA family protein                                 | hypothetical protein                                                                                                                                                                                                 | outer membrane protein, involve in lipopolysaccharide export          | has signal peptide                                                           |
| 254780744 | 537021.9.peg.496 | ABC transporter nucleotide binding/ATPase protein   | Lipopolysaccharide ABC transporter, ATP-binding protein LptB                                                                                                                                                         | ABC-type exporter for lipopolysaccharide, ATPase component            |                                                                              |
| 254780743 | 537021.9.peg.497 | putative uracil-DNA glycosylase                     | Uracil-DNA glycosylase, family 4                                                                                                                                                                                     | Uracil-DNA glycosylase                                                |                                                                              |
| 254780742 | 537021.9.peg.498 | hypothetical protein                                | Carboxynorspermidine dehydrogenase, putative (EC 1.1.1.-)                                                                                                                                                            | Saccharopine dehydrogenase and related protein                        |                                                                              |
| 254780741 | 537021.9.peg.499 | carboxynorspermidine decarboxylase                  | Carboxynorspermidine decarboxylase, putative (EC 4.1.1.-)                                                                                                                                                            | carboxynorspermidine decarboxylase (EC 4.1.1.-)                       |                                                                              |
| 254780740 | 537021.9.peg.500 | peptidase S16 lon domain protein                    | Uncharacterized protein, similar to the N-terminal domain of Lon protease                                                                                                                                            | ATP-dependent protease, La                                            |                                                                              |
| 254780739 | 537021.9.peg.501 | hypothetical protein                                | protein of unknown function DUF343                                                                                                                                                                                   | unknown                                                               |                                                                              |
| 255764483 | 537021.9.peg.502 | hypothetical protein                                | hypothetical protein                                                                                                                                                                                                 | unknown                                                               |                                                                              |
| 254780737 | 537021.9.peg.503 | hypothetical protein                                | hypothetical protein                                                                                                                                                                                                 | unknown                                                               | has signal peptide                                                           |
| 254780736 | 537021.9.peg.504 | hypothetical protein                                | Flp pilus assembly protein, pilin Flp                                                                                                                                                                                | Flp pilus assembly protein, flp                                       | transmembrane protein, but might be processed by cpaA and become periplasmic |
| 254780735 | 537021.9.peg.505 | hypothetical protein                                | hypothetical protein                                                                                                                                                                                                 | Flp pilus assembly protein,flp                                        | has signal peptide                                                           |
| 254780734 | 537021.9.peg.506 | Flp/Fap pilin component                             | hypothetical protein                                                                                                                                                                                                 | Flp pilus assembly protein, flp                                       | transmembrane protein, but might be processed by cpaA and become periplasmic |
| 254780733 | 537021.9.peg.507 | hypothetical protein                                | hypothetical protein                                                                                                                                                                                                 | Flp pilus assembly protein, flp                                       | transmembrane protein, but might be processed by cpaA and become periplasmic |
| 254780732 | 537021.9.peg.508 | hypothetical protein                                | Flp pilus assembly protein, pilin Flp                                                                                                                                                                                | Flp pilus assembly protein, flp                                       | transmembrane protein, but might be processed by cpaA and become periplasmic |
| 254780730 | 537021.9.peg.510 | hypothetical protein                                | Flp pilus assembly protein, pilin Flp                                                                                                                                                                                | Flp pilus assembly protein, flp                                       | transmembrane protein, but might be processed                                |

|                  |                  |                                                                                            |                                                                                      |                                                              |                                           |
|------------------|------------------|--------------------------------------------------------------------------------------------|--------------------------------------------------------------------------------------|--------------------------------------------------------------|-------------------------------------------|
|                  |                  |                                                                                            |                                                                                      |                                                              | by cpaA and become periplasmic            |
| <b>254780729</b> | 537021.9.peg.511 | peptidase A24A prepilin type IV                                                            | Type IV prepilin peptidase TadV/CpaA                                                 | Flp pilus assembly protein CpaA                              | transmembrane protein                     |
| <b>254780728</b> | 537021.9.peg.512 | pilus assembly protein                                                                     | Flp pilus assembly protein RcpC/CpaB                                                 | Flp pilus assembly protein CpaB                              | has signal peptide                        |
| <b>254780727</b> | 537021.9.peg.513 | putative pilus assembly protein                                                            | Type II/IV secretion system secretin RcpA/CpaC, associated with Flp pilus assembly   | Flp pilus assembly protein, secretin CpaC                    | has signal peptide                        |
| <b>255764485</b> | 537021.9.peg.514 | hypothetical protein                                                                       | Flp pilus assembly protein CpaD                                                      | Flp pilus assembly protein, ATPase CpaD                      | has signal peptide                        |
| <b>254780725</b> | 537021.9.peg.515 | response regulator receiver protein                                                        | Type II/IV secretion system ATPase TadZ/CpaE, associated with Flp pilus assembly     | Flp pilus assembly protein, ATPase CpaE                      |                                           |
| <b>254780724</b> | 537021.9.peg.516 | component of type IV pilus                                                                 | Type II/IV secretion system ATP hydrolase TadA/VirB11/CpaF, TadA subfamily           | Flp pilus assembly protein, ATPase CpaF                      |                                           |
| <b>254780723</b> | 537021.9.peg.517 | hypothetical protein                                                                       | hypothetical protein                                                                 | Flp pilus assembly protein TadB                              | transmembrane protein                     |
| <b>254780722</b> | 537021.9.peg.518 | pilus assembly protein                                                                     | Flp pilus assembly protein TadB                                                      | Flp pilus assembly protein TadB                              | transmembrane protein, 1/2 of the protein |
| <b>254780721</b> | 537021.9.peg.519 | pilus component protein                                                                    | Type II/IV secretion system protein TadC, associated with Flp pilus assembly         | Flp pilus assembly protein TadC                              | transmembrane protein                     |
| <b>254780720</b> | 537021.9.peg.520 | Ferroxidase                                                                                | Ferritin-like protein 2                                                              | Ferroxidase                                                  |                                           |
| <b>254780719</b> | 537021.9.peg.521 | zinc uptake ABC transporter, permease protein                                              | Zinc ABC transporter, inner membrane permease protein ZnuB                           | ABC-type importer for zinc, transmembrane component          | transmembrane protein                     |
| <b>254780718</b> | 537021.9.peg.522 | putative high-affinity zinc uptake system ATP-binding component of ABC transporter protein | Zinc ABC transporter, ATP-binding protein ZnuC                                       | ABC-type importer for zinc, ATPase component                 |                                           |
| <b>254780717</b> | 537021.9.peg.524 | zinc uptake ABC transporter                                                                | Zinc ABC transporter, periplasmic-binding protein ZnuA                               | ABC-type importer for zinc, substrate binding component      | has signal peptide                        |
| <b>254780716</b> | 537021.9.peg.525 | 6-phosphogluconate dehydrogenase                                                           | 6-phosphogluconate dehydrogenase, decarboxylating (EC 1.1.1.44)                      | 6-phosphogluconate dehydrogenase (EC 1.1.1.44)               |                                           |
| <b>254780715</b> | 537021.9.peg.526 | 50S ribosomal protein L19                                                                  | LSU ribosomal protein L19p                                                           | 50S ribosomal protein L19                                    |                                           |
| <b>254780714</b> | 537021.9.peg.527 | tRNA (guanine-N(1)-)-methyltransferase                                                     | tRNA (Guanine37-N1) -methyltransferase (EC 2.1.1.31)                                 | tRNA-(guanine-N1)-methyltransferase, trmD (EC 2.1.1.31)      |                                           |
| <b>254780713</b> | 537021.9.peg.528 | 16S rRNA-processing protein                                                                | 16S rRNA processing protein RimM                                                     | rimM, 16S rRNA-processing protein                            |                                           |
| <b>254780712</b> | 537021.9.peg.529 | 30S ribosomal protein S16                                                                  | SSU ribosomal protein S16p                                                           | 30S ribosomal protein S16                                    |                                           |
| <b>254780711</b> | 537021.9.peg.530 | signal recognition particle protein                                                        | Signal recognition particle, subunit Ffh SRP54 (TC 3.A.5.1.1)                        | signal recognition particle protein                          |                                           |
| <b>254780710</b> | 537021.9.peg.531 | diaminopimelate epimerase                                                                  | Diaminopimelate epimerase (EC 5.1.1.7)                                               | diaminopimelate epimerase (EC 5.1.1.7)                       |                                           |
| <b>254780709</b> | 537021.9.peg.533 | cell division protein                                                                      | Signal recognition particle receptor protein FtsY (=alpha subunit) (TC 3.A.5.1.1)    | cell division protein FtsY                                   |                                           |
| <b>254780708</b> | 537021.9.peg.534 | intracellular septation protein A                                                          | hypothetical protein                                                                 | intracellular septation protein A                            | transmembrane protein                     |
| <b>254780707</b> | 537021.9.peg.535 | putative phosphate-binding periplasmic protein                                             | Phosphate ABC transporter, periplasmic phosphate-binding protein PstS (TC 3.A.1.7.1) | ABC-type importer for phosphate, substrate binding component | has signal peptide                        |
| <b>255764486</b> | 537021.9.peg.536 | ABC transporter, membrane spanning protein                                                 | Phosphate transport system permease protein PstC (TC 3.A.1.7.1)                      | ABC-type importer for phosphate, transmembrane component     | transmembrane protein                     |
| <b>254780705</b> | 537021.9.peg.537 | phosphate ABC transporter, permease protein PstA                                           | Phosphate transport system permease protein PstA (TC 3.A.1.7.1)                      | ABC-type importer for phosphate, transmembrane component     | transmembrane protein                     |
| <b>254780704</b> | 537021.9.peg.538 | ABC transporter, nucleotide binding/ATPase protein                                         | Phosphate transport ATP-binding protein PstB (TC 3.A.1.7.1)                          | ABC-type importer for phosphate, ATPase component            |                                           |
| <b>254780703</b> | 537021.9.peg.539 | putative phosphate transport system protein                                                | Phosphate transport system regulatory protein PhoU                                   | phosphate transport system regulatory protein                |                                           |
| <b>255764487</b> | 537021.9.peg.540 | heat shock protein                                                                         | Heat shock protein GrpE                                                              | heat shock protein                                           |                                           |
| <b>254780701</b> | 537021.9.peg.541 | putative two-component sensor histidine kinase transcriptional regulatory protein          | Sensor histidine kinase (EC 2.7.3.-)                                                 | two-component sensor histidine kinase (EC 2.7.3.-)           | transmembrane protein                     |
| <b>254780700</b> | 537021.9.peg.543 | serine protease DO-like protease                                                           | putative serine protease                                                             | serine protease DO-like protease                             | has signal peptide                        |
| <b>254780699</b> | 537021.9.peg.544 | hypothetical protein                                                                       | hypothetical protein                                                                 | unknown                                                      |                                           |
| <b>254780698</b> | 537021.9.peg.545 | D-alanyl-D-alanine carboxypeptidase 1 penicillin-binding protein                           | D-alanyl-D-alanine carboxypeptidase (EC 3.4.16.4)                                    | D-alanyl-D-alanine carboxypeptidase (EC 3.4.16.4)            | has signal peptide                        |
| <b>254780697</b> | 537021.9.peg.546 | large conductance mechanosensitive channel protein                                         | Large-conductance mechanosensitive channel                                           | large conductance mechanosensitive channel                   | transmembrane protein                     |
| <b>254780696</b> | 537021.9.peg.547 | glutathione synthetase                                                                     | Glutathione synthetase (EC 6.3.2.3)                                                  | glutathione synthetase (EC 6.3.2.3)                          |                                           |
| <b>254780695</b> | 537021.9.peg.548 | flagellar MS-ring protein                                                                  | Flagellar M-ring protein FlhF                                                        | flagellar MS-ring protein                                    | transmembrane protein                     |

|           |                  |                                                                                           |                                                                                                           |                                                                                                                     |                                                            |
|-----------|------------------|-------------------------------------------------------------------------------------------|-----------------------------------------------------------------------------------------------------------|---------------------------------------------------------------------------------------------------------------------|------------------------------------------------------------|
| 254780694 | 537021.9.peg.549 | probable transcriptional regulator protein, LuxR family                                   | transcriptional regulator                                                                                 | transcriptional regulator                                                                                           |                                                            |
| 254780693 | 537021.9.peg.550 | transcriptional regulator protein                                                         | PUTATIVE TRANSCRIPTION REGULATOR PROTEIN                                                                  | transcriptional regulator                                                                                           |                                                            |
| 254780691 | 537021.9.peg.551 | hypothetical protein                                                                      | hypothetical protein                                                                                      | unknown                                                                                                             |                                                            |
| 254780690 | 537021.9.peg.552 | flagellar biosynthesis protein FlhB                                                       | Flagellar biosynthesis protein FlhB                                                                       | flagellar biosynthesis protein FlhB                                                                                 | transmembrane protein                                      |
| 254780689 | 537021.9.peg.553 | flagellar motor switch protein G                                                          | Flagellar motor switch protein FlhG                                                                       | flagellar motor switch protein G                                                                                    |                                                            |
| 254780688 | 537021.9.peg.554 | putative flagellar motor switch protein                                                   | putative flagellar motor switch protein                                                                   | putative flagellar motor switch protein                                                                             |                                                            |
| 254780687 | 537021.9.peg.555 | flagellar C-ring protein                                                                  | Flagellar motor switch protein FlhM                                                                       | flagellar C-ring protein                                                                                            |                                                            |
| 255764488 | 537021.9.peg.556 | flagellar motor protein MotA                                                              | Flagellar motor rotation protein MotA                                                                     | flagellar motor protein MotA                                                                                        | transmembrane protein                                      |
| 254780685 | 537021.9.peg.557 | flagellar basal body rod protein FlgF                                                     | Flagellar basal-body rod protein flgF                                                                     | flagellar basal body rod protein FlgF                                                                               | outermembrane, transported by flagellar assembly machinery |
| 254780684 | 537021.9.peg.558 | flagellum-specific ATP synthase                                                           | Flagellum-specific ATP synthase FlhI                                                                      | flagellum-specific ATP synthase                                                                                     |                                                            |
| 254780683 | 537021.9.peg.559 | lipoprotein                                                                               | lipoprotein precursor protein                                                                             | Peptidase M23                                                                                                       |                                                            |
| 254780682 | 537021.9.peg.560 | hypothetical protein                                                                      | hypothetical protein                                                                                      | Peptidase M23                                                                                                       |                                                            |
| 255764489 | 537021.9.peg.561 | stationary phase survival protein SurE                                                    | 5-nucleotidase SurE (EC 3.1.3.5)                                                                          | stationary phase survival protein SurE (EC 3.1.3.5)                                                                 |                                                            |
| 254780680 | 537021.9.peg.562 | seryl-tRNA synthetase                                                                     | Seryl-tRNA synthetase (EC 6.1.1.11)                                                                       | seryl-tRNA synthetase (EC 6.1.1.11)                                                                                 |                                                            |
| 254780679 | N/A              | hypothetical protein                                                                      | N/A                                                                                                       | unknown                                                                                                             | transmembrane protein                                      |
| 254780677 | 537021.9.peg.564 | hypothetical protein                                                                      | Putative oligoketide cyclase/lipid transport protein                                                      | Oligoketide cyclase/lipid transport protein                                                                         |                                                            |
| 254780676 | 537021.9.peg.565 | lipoyl synthase                                                                           | Lipoate synthase                                                                                          | lipoyl synthase                                                                                                     |                                                            |
| 254780675 | 537021.9.peg.566 | dihydrolipoamide dehydrogenase                                                            | Dihydrolipoamide dehydrogenase of pyruvate dehydrogenase complex (EC 1.8.1.4)                             | Dihydrolipoamide dehydrogenase of pyruvate dehydrogenase complex (EC 1.8.1.4)                                       |                                                            |
| 254780674 | 537021.9.peg.567 | pyruvate dehydrogenase complex dihydrolipoamide acetyltransferase                         | Dihydrolipoamide acetyltransferase component of pyruvate dehydrogenase complex (EC 2.3.1.12)              | pyruvate dehydrogenase complex dihydrolipoamide acetyltransferase (EC 2.3.1.12)                                     |                                                            |
| 254780673 | 537021.9.peg.569 | pyruvate dehydrogenase subunit beta                                                       | Pyruvate dehydrogenase E1 component beta subunit (EC 1.2.4.1)                                             | pyruvate dehydrogenase subunit beta (EC 1.2.4.1)                                                                    |                                                            |
| 255764490 | 537021.9.peg.570 | dehydrogenase, E1 component                                                               | Pyruvate dehydrogenase E1 component alpha subunit (EC 1.2.4.1)                                            | dehydrogenase, E1 component (EC 1.2.4.1)                                                                            |                                                            |
| 254780671 | 537021.9.peg.571 | putative cell division protein                                                            | Septum formation initiator                                                                                | cell division protein                                                                                               | transmembrane protein                                      |
| 254780670 | 537021.9.peg.572 | phosphopyruvate hydratase                                                                 | Enolase (EC 4.2.1.11)                                                                                     | phosphopyruvate hydratase (EC 4.2.1.11)                                                                             |                                                            |
| 254780669 | 537021.9.peg.573 | 2-dehydro-3-deoxyphosphooctonate aldolase                                                 | 2-Keto-3-deoxy-D-manno-octulosonate-8-phosphate synthase (EC 2.5.1.55)                                    | 2-dehydro-3-deoxyphosphooctonate aldolase (EC 2.5.1.55)                                                             |                                                            |
| 254780668 | 537021.9.peg.575 | hypothetical protein                                                                      | hypothetical protein                                                                                      | unknown                                                                                                             |                                                            |
| 254780666 | 537021.9.peg.576 | Fmu (Sun) domain protein                                                                  | 16S rRNA m(5)C 967 methyltransferase (EC 2.1.1.-)                                                         | tRNA and rRNA cytosine-C5-methylase (EC 2.1.1.-)                                                                    |                                                            |
| 254780664 | 537021.9.peg.578 | bifunctional phosphoribosylaminoimidazolecarboxamide formyltransferase/IMP cyclohydrolase | IMP cyclohydrolase (EC 3.5.4.10) / Phosphoribosylaminoimidazolecarboxamide formyltransferase (EC 2.1.2.3) | bifunctional phosphoribosylaminoimidazolecarboxamide formyltransferase/IMP cyclohydrolase (EC 1.4.1.2) (EC 1.4.1.2) |                                                            |
| 254780663 | 537021.9.peg.579 | carbonate dehydratase                                                                     | Carbonic anhydrase (EC 4.2.1.1)                                                                           | carbonate dehydratase (EC 4.2.1.1)                                                                                  |                                                            |
| 254780662 | 537021.9.peg.580 | NAD-glutamate dehydrogenase                                                               | NAD-specific glutamate dehydrogenase (EC 1.4.1.2), large form                                             | NAD-glutamate dehydrogenase (EC 1.4.1.2)                                                                            |                                                            |
| 254780661 | 537021.9.peg.581 | exonuclease I                                                                             | Exodeoxyribonuclease I (EC 3.1.11.1)                                                                      | exonuclease I (EC 3.1.11.1)                                                                                         |                                                            |
| 254780660 | 537021.9.peg.583 | hypothetical protein                                                                      | FIG000859: hypothetical protein                                                                           | unknown                                                                                                             |                                                            |
| 254780659 | 537021.9.peg.584 | hypothetical protein                                                                      | FIG006542: Phosphoesterase                                                                                | Calcineurin-like phosphoesterase                                                                                    |                                                            |
| 254780658 | 537021.9.peg.585 | 5-formyltetrahydrofolate cyclo-ligase                                                     | 5-formyltetrahydrofolate cyclo-ligase (EC 6.3.3.2)                                                        | 5-formyltetrahydrofolate cyclo-ligase (EC 6.3.3.2)                                                                  | 1/2 of the protein                                         |
| 254780657 | 537021.9.peg.586 | hypothetical protein                                                                      | hypothetical protein                                                                                      | 5-formyltetrahydrofolate cyclo-ligase (EC 6.3.3.2)                                                                  | 1/2 of the protein                                         |
| 255764492 | 537021.9.peg.587 | hypothetical protein                                                                      | hypothetical protein                                                                                      | unknown                                                                                                             |                                                            |
| 254780655 | 537021.9.peg.588 | transketolase                                                                             | Transketolase (EC 2.2.1.1)                                                                                | transketolase (EC 2.2.1.1)                                                                                          |                                                            |
| 254780654 | 537021.9.peg.589 | Glyceraldehyde 3-Phosphate Dehydrogenase                                                  | NAD-dependent glyceraldehyde-3-phosphate dehydrogenase (EC 1.2.1.12)                                      | Glyceraldehyde 3-Phosphate Dehydrogenase (EC 1.2.1.12)                                                              |                                                            |
| 254780653 | 537021.9.peg.590 | phosphoglycerate kinase                                                                   | Phosphoglycerate kinase (EC 2.7.2.3)                                                                      | phosphoglycerate kinase (EC 2.7.2.3)                                                                                |                                                            |
| 254780652 | 537021.9.peg.591 | Fructose-bisphosphate aldolase                                                            | Fructose-bisphosphate aldolase class I (EC 4.1.2.13)                                                      | Fructose-bisphosphate aldolase (EC 4.1.2.13)                                                                        |                                                            |
| 254780650 | 537021.9.peg.592 | hypothetical protein                                                                      | hypothetical protein                                                                                      | unknown                                                                                                             |                                                            |
| 254780649 | 537021.9.peg.594 | nicotinic acid mononucleotide adenyltransferase                                           | Nicotinate-nucleotide adenyltransferase (EC 2.7.7.18)                                                     | nicotinic acid mononucleotide adenyltransferase (EC                                                                 |                                                            |

|           |                  |                                                                                      |                                                                                                                                         |                                                                                                                 |                       |
|-----------|------------------|--------------------------------------------------------------------------------------|-----------------------------------------------------------------------------------------------------------------------------------------|-----------------------------------------------------------------------------------------------------------------|-----------------------|
|           |                  |                                                                                      | bacterial NadD family                                                                                                                   | 2.7.7.18)                                                                                                       |                       |
| 254780648 | 537021.9.peg.595 | GTPase ObgE                                                                          | COG0536: GTP-binding protein Obg                                                                                                        | GTPase ObgE, regulator of replication                                                                           |                       |
| 254780647 | 537021.9.peg.596 | 50S ribosomal protein L27                                                            | LSU ribosomal protein L27p                                                                                                              | 50S ribosomal protein L27                                                                                       |                       |
| 254780646 | 537021.9.peg.597 | 50S ribosomal protein L21                                                            | LSU ribosomal protein L21p                                                                                                              | 50S ribosomal protein L21                                                                                       |                       |
| 254780645 | 537021.9.peg.599 | hypothetical protein                                                                 | hypothetical protein                                                                                                                    | unknown                                                                                                         |                       |
| 254780644 | 537021.9.peg.600 | hypothetical protein                                                                 | hypothetical protein                                                                                                                    | unknown                                                                                                         |                       |
| 254780642 | 537021.9.peg.601 | hypothetical protein                                                                 | hypothetical protein                                                                                                                    | unknown                                                                                                         |                       |
| 254780641 | 537021.9.peg.602 | hypothetical protein                                                                 | hypothetical protein                                                                                                                    | Chromosome segregation ATPases                                                                                  | 1/2 of the protein    |
| 254780640 | N/A              | hypothetical protein                                                                 | N/A                                                                                                                                     | Chromosome segregation ATPases                                                                                  | 1/2 of the protein    |
| 254780639 | 537021.9.peg.604 | hypothetical protein                                                                 | hypothetical protein                                                                                                                    | unknown                                                                                                         |                       |
| 254780638 | 537021.9.peg.605 | molecular chaperone protein DnaJ                                                     | Chaperone protein DnaJ                                                                                                                  | molecular chaperone protein DnaJ                                                                                |                       |
| 255764494 | 537021.9.peg.606 | molecular chaperone DnaK                                                             | Chaperone protein DnaK                                                                                                                  | molecular chaperone DnaK                                                                                        |                       |
| 254780636 | 537021.9.peg.607 | ribonuclease D                                                                       | Ribonuclease D related protein                                                                                                          | ribonuclease D                                                                                                  |                       |
| 254780635 | 537021.9.peg.608 | hypothetical protein                                                                 | Iron-regulated protein A precursor                                                                                                      | Uncharacterized iron-regulated protein                                                                          | has signal peptide    |
| 254780634 | 537021.9.peg.609 | NOL1/NOP2/SUN family signature protein                                               | Sun protein                                                                                                                             | rRNA and rRNA cytosine-C5-methylase                                                                             |                       |
| 254780633 | 537021.9.peg.610 | creatinine amidohydrolase                                                            | Creatinine amidohydrolase (EC 3.5.2.10)                                                                                                 | creatinine amidohydrolase (EC 3.5.2.10)                                                                         |                       |
| 254780632 | 537021.9.peg.611 | hypothetical protein                                                                 | hypothetical protein                                                                                                                    | unknown                                                                                                         |                       |
| 254780630 | 537021.9.peg.613 | ribonuclease PH                                                                      | Ribonuclease PH (EC 2.7.7.56)                                                                                                           | ribonuclease PH (EC 2.7.7.56)                                                                                   |                       |
| 254780629 | 537021.9.peg.614 | putative deoxyribonucleotide triphosphate pyrophosphatase                            | Nucleoside 5-triphosphatase RdgB (dHATP, dTTP, XTP-specific) (EC 3.6.1.15)                                                              | putative deoxyribonucleotide triphosphate pyrophosphatase (EC 3.6.1.15)                                         |                       |
| 254780628 | 537021.9.peg.615 | coproporphyrinogen III oxidase                                                       | Radical SAM family enzyme, similar to coproporphyrinogen III oxidase, oxygen-independent, clustered with nucleoside-triphosphatase RdgB | coproporphyrinogen III oxidase                                                                                  |                       |
| 254780627 | 537021.9.peg.616 | chromosomal replication initiation protein                                           | Chromosomal replication initiator protein DnaA                                                                                          | chromosomal replication initiation protein                                                                      |                       |
| 254780626 | 537021.9.peg.617 | 30S ribosomal protein S20                                                            | SSU ribosomal protein S20p                                                                                                              | 30S ribosomal protein S20                                                                                       |                       |
| 254780625 | 537021.9.peg.618 | formamidopyrimidine-DNA glycosylase                                                  | Formamidopyrimidine-DNA glycosylase (EC 3.2.2.23)                                                                                       | formamidopyrimidine-DNA glycosylase (EC 3.2.2.23)                                                               |                       |
| 254780624 | 537021.9.peg.619 | ubiquinone/menaquinone biosynthesis methyltransferase                                | Ubiquinone/menaquinone biosynthesis methyltransferase UbiE (EC 2.1.1.-)                                                                 | ubiquinone/menaquinone biosynthesis methyltransferase (EC 2.1.1.-)                                              |                       |
| 254780623 | 537021.9.peg.620 | 2-polyprenylphenol 6-hydroxylase                                                     | Ubiquinone biosynthesis monooxygenase UbiB                                                                                              | 2-polyprenylphenol 6-hydroxylase                                                                                | transmembrane protein |
| 254780622 | 537021.9.peg.621 | bifunctional phosphopantothenoylecysteine decarboxylase/phosphopantothenate synthase | Phosphopantothenoylecysteine decarboxylase (EC 4.1.1.36) / Phosphopantothenoylecysteine synthetase (EC 6.3.2.5)                         | Phosphopantothenoylecysteine decarboxylase (EC 4.1.1.36) / Phosphopantothenoylecysteine synthetase (EC 6.3.2.5) |                       |
| 254780621 | 537021.9.peg.622 | small heat shock protein                                                             | 16 kDa heat shock protein A                                                                                                             | small heat shock protein                                                                                        |                       |
| 254780620 | 537021.9.peg.623 | iron-responsive transcriptional regulator                                            | Iron-responsive repressor RirA                                                                                                          | iron-responsive transcriptional regulator                                                                       |                       |
| 254780619 | 537021.9.peg.624 | primosome assembly protein PriA                                                      | Helicase PriA essential for oriC/DnaA-independent DNA replication                                                                       | primosome assembly protein PriA                                                                                 |                       |
| 254780618 | 537021.9.peg.625 | FOF1 ATP synthase subunit delta                                                      | ATP synthase delta chain (EC 3.6.3.14)                                                                                                  | FOF1 ATP synthase subunit delta (EC 3.6.3.14)                                                                   |                       |
| 254780617 | 537021.9.peg.626 | FOF1 ATP synthase subunit alpha                                                      | ATP synthase alpha chain (EC 3.6.3.14)                                                                                                  | FOF1 ATP synthase subunit alpha (EC 3.6.3.14)                                                                   |                       |
| 254780616 | 537021.9.peg.627 | FOF1 ATP synthase subunit gamma                                                      | ATP synthase gamma chain (EC 3.6.3.14)                                                                                                  | FOF1 ATP synthase subunit gamma (EC 3.6.3.14)                                                                   |                       |
| 254780615 | 537021.9.peg.628 | FOF1 ATP synthase subunit beta                                                       | ATP synthase beta chain (EC 3.6.3.14)                                                                                                   | FOF1 ATP synthase subunit beta (EC 3.6.3.14)                                                                    |                       |
| 254780614 | 537021.9.peg.629 | FOF1 ATP synthase subunit epsilon                                                    | ATP synthase epsilon chain (EC 3.6.3.14)                                                                                                | FOF1 ATP synthase subunit epsilon (EC 3.6.3.14)                                                                 |                       |
| 254780613 | 537021.9.peg.630 | adenylosuccinate synthetase                                                          | Adenylosuccinate synthetase (EC 6.3.4.4)                                                                                                | adenylosuccinate synthetase (EC 6.3.4.4)                                                                        |                       |
| 254780612 | 537021.9.peg.631 | putative transmembrane protein                                                       | hypothetical protein                                                                                                                    | unknown                                                                                                         | transmembrane protein |
| 254780611 | 537021.9.peg.632 | RNA polymerase factor sigma-32                                                       | RNA polymerase sigma factor RpoH                                                                                                        | RNA polymerase factor sigma-32                                                                                  |                       |
| 254780610 | 537021.9.peg.633 | RNA-pseudouridylate synthase protein, ribosomal large subunit D                      | Ribosomal large subunit pseudouridine synthase D (EC 4.2.1.70)                                                                          | ribosomal large subunit pseudouridine synthase D (EC 4.2.1.70)                                                  |                       |
| 255764495 | 537021.9.peg.635 | putative phosphoesterase protein                                                     | putative phosphohydrolases, Icc family                                                                                                  | phosphoesterase protein                                                                                         |                       |
| 254780608 | 537021.9.peg.636 | ribosomal large subunit pseudouridine synthase C                                     | Ribosomal large subunit pseudouridine synthase C (EC 4.2.1.70) LSU Psi955, Psi2504 and Psi2580                                          | ribosomal large subunit pseudouridine synthase C (EC 4.2.1.70)                                                  |                       |
| 254780607 | 537021.9.peg.637 | hypothetical protein                                                                 | Putative secreted protein                                                                                                               | unknown                                                                                                         | has signal peptide    |
| 254780606 | 537021.9.peg.638 | cell division protein                                                                | Cell division protein FtsK                                                                                                              | cell division protein FtsK                                                                                      |                       |
| 254780605 | 537021.9.peg.639 | putative aminopeptidase                                                              | Xaa-Pro aminopeptidase (EC 3.4.11.9)                                                                                                    | aminopeptidase                                                                                                  |                       |
| 254780604 | 537021.9.peg.640 | 5-aminolevulinate synthase                                                           | 5-aminolevulinate synthase (EC 2.3.1.37)                                                                                                | 5-aminolevulinate synthase (EC 2.3.1.37)                                                                        |                       |
| 254780603 | 537021.9.peg.641 | tRNA/rRNA methyltransferase protein                                                  | rRNA methylases                                                                                                                         | rRNA methylases                                                                                                 |                       |
| 254780602 | 537021.9.peg.642 | aspartate aminotransferase                                                           | Aspartate aminotransferase (EC 2.6.1.1)                                                                                                 | aspartate aminotransferase                                                                                      |                       |

|           |                  |                                                                   |                                                                                                  |                                                                                |                                        |
|-----------|------------------|-------------------------------------------------------------------|--------------------------------------------------------------------------------------------------|--------------------------------------------------------------------------------|----------------------------------------|
| 254780601 | 537021.9.peg.643 | ATP-dependent RNA helicase protein                                | ATP-dependent RNA helicase, DEAD/DEAH box family                                                 | ATP-dependent RNA helicase protein                                             |                                        |
| 254780600 | 537021.9.peg.644 | CDP-diacylglycerol/glycerol-3-phosphate 3-phosphatidyltransferase | CDP-diacylglycerol--glycerol-3-phosphate 3-phosphatidyltransferase (EC 2.7.8.5)                  | CDP-diacylglycerol/glycerol-3-phosphate 3-phosphatidyltransferase (EC 2.7.8.5) | transmembrane protein                  |
| 255764496 | 537021.9.peg.645 | excinuclease ABC subunit C                                        | Excinuclease ABC subunit C                                                                       | excinuclease ABC subunit C, uvrC                                               |                                        |
| 254780598 | 537021.9.peg.646 | outer membrane protein                                            | OmpA-like transmembrane region                                                                   | outer membrane protein                                                         | has signal peptide                     |
| 255764497 | 537021.9.peg.647 | ABC transporter permease                                          | ABC-type anion transport system, duplicated permease component                                   | ABC-type importer for sulfonate-like oxoacid ion, transmembrane component      | transmembrane protein                  |
| 254780596 | 537021.9.peg.648 | ABC transporter nucleotide binding/ATPase protein                 | ABC-type nitrate/sulfonate/bicarbonate transport system, ATPase component                        | ABC-type importer for sulfonate-like oxoacid ion, ATPase component             |                                        |
| 254780595 | 537021.9.peg.649 | nucleoside-diphosphate-sugar epimerase protein                    | Nucleoside-diphosphate-sugar epimerases                                                          | nucleoside-diphosphate-sugar epimerase protein                                 |                                        |
| 254780594 | 537021.9.peg.650 | Glutathione S-transferase domain protein                          | Glutathione S-transferase family protein                                                         | Glutathione S-transferase domain protein                                       |                                        |
| 254780593 | 537021.9.peg.651 | undecaprenyl pyrophosphate phosphatase                            | Undecaprenyl-diphosphatase (EC 3.6.1.27)                                                         | undecaprenyl pyrophosphate phosphatase (EC 3.6.1.27)                           | transmembrane protein                  |
| 254780592 | 537021.9.peg.652 | TPR repeat-containing protein                                     | Flp pilus assembly protein TadD, contains TPR repeat                                             | Flp pilus assembly protein, TadD                                               | has signal peptide                     |
| 254780591 | 537021.9.peg.653 | aminomethyltransferase protein (glycine cleavage)                 | Folate-dependent protein for Fe/S cluster synthesis/repair in oxidative stress                   | aminomethyltransferase protein                                                 |                                        |
| 254780590 | 537021.9.peg.654 | hypothetical protein                                              | hypothetical protein                                                                             | unknown                                                                        |                                        |
| 254780589 | 537021.9.peg.655 | hypothetical protein                                              | probable exported protein STY0357                                                                | unknown                                                                        | has signal peptide                     |
| 254780588 | 537021.9.peg.656 | acetyl-CoA carboxylase carboxyltransferase subunit alpha          | Acetyl-coenzyme A carboxyl transferase alpha chain (EC 6.4.1.2)                                  | acetyl-CoA carboxylase carboxyltransferase (EC 6.4.1.2)                        |                                        |
| 255764498 | 537021.9.peg.657 | site-specific tyrosine recombinase XerD                           | Tyrosine recombinase XerD                                                                        | site-specific tyrosine recombinase, XerD                                       |                                        |
| 254780586 | 537021.9.peg.659 | BolA family protein                                               | Cell division protein BolA                                                                       | Stress-induced morphogen, BolA family protein, involve in signal transduction  |                                        |
| 254780585 | 537021.9.peg.660 | molecular chaperone DnaJ family protein                           | FIG003437: hypothetical with DnaJ-like domain                                                    | molecular chaperone DnaJ family protein                                        |                                        |
| 254780584 | 537021.9.peg.661 | 50S ribosomal protein L28                                         | hypothetical protein                                                                             | 50S ribosomal protein L28                                                      |                                        |
| 254780583 | 537021.9.peg.662 | glyoxalase II                                                     | Hydroxyacylglutathione hydrolase (EC 3.1.2.6)                                                    | glyoxalase II                                                                  |                                        |
| 254780582 | 537021.9.peg.663 | Methyltransferase type 11                                         | SAM-dependent methyltransferase 2, in cluster with Hydroxyacylglutathione hydrolase (EC 3.1.2.6) | Methyltransferase                                                              |                                        |
| 255764499 | 537021.9.peg.664 | 1-acyl-sn-glycerol-3-phosphate acyltransferase                    | 1-acyl-sn-glycerol-3-phosphate acyltransferase                                                   | 1-acyl-sn-glycerol-3-phosphate acyltransferase                                 | transmembrane protein                  |
| 254780579 | 537021.9.peg.665 | hypothetical protein                                              | hypothetical protein                                                                             | unknown                                                                        | transmembrane protein                  |
| 254780578 | 537021.9.peg.666 | phosphatidylserine synthase                                       | CDP-diacylglycerol--serine O-phosphatidyltransferase (EC 2.7.8.8)                                | phosphatidylserine synthase (EC 2.7.8.8)                                       | transmembrane protein                  |
| 254780577 | 537021.9.peg.667 | phosphatidylserine decarboxylase                                  | Phosphatidylserine decarboxylase (EC 4.1.1.65)                                                   | phosphatidylserine decarboxylase (EC 4.1.1.65)                                 | transmembrane protein                  |
| 254780576 | 537021.9.peg.668 | ABC transporter related protein                                   | putative ATP-binding component of ABC transporter                                                | ABC-type ATPase and permease for heavy metal export                            | transmembrane protein                  |
| 254780575 | 537021.9.peg.669 | hypothetical protein                                              | hypothetical protein                                                                             | permeases, RarD                                                                | transmembrane protein                  |
| 255764500 | 537021.9.peg.670 | hypothetical protein                                              | hypothetical protein                                                                             | unknown                                                                        | has signal peptide                     |
| 254780573 | 537021.9.peg.672 | cysteinyl-tRNA synthetase                                         | Cysteinyl-tRNA synthetase (EC 6.1.1.16)                                                          | cysteinyl-tRNA synthetase (EC 6.1.1.16)                                        |                                        |
| 254780572 | 537021.9.peg.673 | hypothetical protein                                              | Similar to TadZ/CpaE, associated with Flp pilus assembly                                         | Flp pilus assembly protein, TadG                                               | transmembrane protein                  |
| 254780571 | 537021.9.peg.674 | hypothetical protein                                              | hypothetical protein                                                                             | Flp pilus assembly protein, TadG                                               | transmembrane protein                  |
| 254780570 | 537021.9.peg.675 | phosphoribosylglycinamide formyltransferase                       | Phosphoribosylglycinamide formyltransferase (EC 2.1.2.2)                                         | phosphoribosylglycinamide formyltransferase (EC 2.1.2.2)                       |                                        |
| 254780569 | 537021.9.peg.676 | phosphoribosylaminoimidazole synthetase                           | Phosphoribosylformylglycinamidine cyclo-ligase (EC 6.3.3.1)                                      | phosphoribosylaminoimidazole synthetase (EC 6.3.3.1)                           |                                        |
| 254780568 | 537021.9.peg.677 | hypothetical protein                                              | hypothetical protein                                                                             | unknown                                                                        | transmembrane protein                  |
| 254780567 | 537021.9.peg.678 | hypothetical protein                                              | Chromosomal replication initiator protein DnaA                                                   | ATPase involved in DNA replication                                             |                                        |
| 254780565 | 537021.9.peg.679 | hypothetical protein                                              | hypothetical protein                                                                             | unknown                                                                        | transmembrane protein                  |
| 254780564 | 537021.9.peg.680 | hypothetical protein                                              | hypothetical protein                                                                             | ABC transporter, extracellular binding protein                                 | 1/2 of the protein                     |
| 254780563 | 537021.9.peg.681 | extracellular solute-binding protein                              | iron ABC transporter, periplasmic iron-binding protein                                           | ABC transporter, extracellular binding protein                                 | has signal peptide, 1/2 of the protein |
| 254780562 | 537021.9.peg.682 | hypothetical protein                                              | hypothetical protein                                                                             | unknown                                                                        |                                        |
| 254780561 | 537021.9.peg.684 | thiamine transporter substrate binding subunit                    | Thiamin ABC transporter, substrate-binding component                                             | ABC-type importer for Thiamine (vitamin B1), substrate binding component       | has signal peptide                     |



|           |                  |                                                             |                                                                                                                                                         |                                                                       |                                                                              |
|-----------|------------------|-------------------------------------------------------------|---------------------------------------------------------------------------------------------------------------------------------------------------------|-----------------------------------------------------------------------|------------------------------------------------------------------------------|
| 255764501 | 537021.9.peg.685 | thiamine transporter membrane protein                       | Thiamin ABC transporter, transmembrane component                                                                                                        | ABC-type importer for Thiamine (vitamin B1), transmembrane component  | transmembrane protein                                                        |
| 254780559 | 537021.9.peg.686 | thiamine transporter ATP-binding subunit                    | Thiamin ABC transporter, ATPase component / Thiamine transport ATP-binding protein thiQ                                                                 | ABC-type importer for Thiamine (vitamin B1), ATPase component         |                                                                              |
| 254780558 | 537021.9.peg.687 | hypothetical protein                                        | Possible divergent polysaccharide deacetylase                                                                                                           | Possible divergent polysaccharide deacetylase                         | transmembrane protein                                                        |
| 254780557 | 537021.9.peg.688 | dinucleoside polyphosphate hydrolase                        | FIG000735: Adenosine (5')-pentaphospho-(5'')-adenosine pyrophosphohydrolase (EC 3.6.1.-)                                                                | dinucleoside polyphosphate hydrolase                                  |                                                                              |
| 254780556 | 537021.9.peg.689 | hypothetical protein                                        | hypothetical protein                                                                                                                                    | unknown                                                               | has signal peptide                                                           |
| 254780555 | 537021.9.peg.690 | hypothetical protein                                        | hypothetical protein                                                                                                                                    | prophage antirepressor                                                |                                                                              |
| 254780554 | 537021.9.peg.692 | Holliday junction resolvase                                 | Crossover junction endodeoxyribonuclease RuvC (EC 3.1.22.4)                                                                                             | Holliday junction resolvase, ruvC (EC 3.1.22.4)                       |                                                                              |
| 254780553 | 537021.9.peg.693 | Holliday junction DNA helicase RuvA                         | Holliday junction DNA helicase RuvA                                                                                                                     | Holliday junction DNA helicase RuvA                                   |                                                                              |
| 254780552 | 537021.9.peg.694 | Holliday junction DNA helicase RuvB                         | Holliday junction DNA helicase RuvB                                                                                                                     | Holliday junction DNA helicase RuvB                                   |                                                                              |
| 254780551 | 537021.9.peg.695 | tolQ protein                                                | MotA/TolQ/ExbB proton channel family protein                                                                                                            | biopolymer transport protein TolQ                                     | transmembrane protein                                                        |
| 255764502 | 537021.9.peg.696 | hypothetical protein                                        | hypothetical protein                                                                                                                                    | Biopolymer transport protein                                          | transmembrane protein                                                        |
| 254780549 | 537021.9.peg.697 | signal peptide protein                                      | hypothetical protein                                                                                                                                    | biopolymer transport protein TolA                                     | transmembrane protein                                                        |
| 254780548 | 537021.9.peg.698 | translocation protein TolB                                  | tolB protein precursor, periplasmic protein involved in the tonb-independent uptake of group A colicins                                                 | translocation protein TolB                                            | has signal peptide                                                           |
| 254780547 | 537021.9.peg.699 | OmpA/MotB                                                   | 18K peptidoglycan-associated outer membrane lipoprotein; Peptidoglycan-associated lipoprotein precursor; Outer membrane protein P6; OmpA/MotB precursor | Pal, the peptidoglycan-associated lipoprotein of Tol-Pal system       | has signal peptide                                                           |
| 254780546 | 537021.9.peg.700 | hypothetical protein                                        | tRNA(Ile)-lysidine synthetase                                                                                                                           | ATPase of the PP-loop superfamily involve in cell cycle control       |                                                                              |
| 254780545 | 537021.9.peg.701 | metalloprotease                                             | Cell division protein FtsH (EC 3.4.24.-)                                                                                                                | ATP-dependent Zn proteasase                                           | transmembrane protein                                                        |
| 254780544 | 537021.9.peg.702 | phosphoglucosamine mutase protein                           | Phosphoglucosamine mutase (EC 5.4.2.10)                                                                                                                 | phosphoglucosamine mutase protein (EC 5.4.2.10)                       |                                                                              |
| 254780543 | 537021.9.peg.703 | NADH dehydrogenase                                          | NADH:ubiquinone oxidoreductase 17.2 kD subunit                                                                                                          | NADH dehydrogenase                                                    |                                                                              |
| 254780542 | 537021.9.peg.704 | hypothetical protein                                        | hypothetical protein                                                                                                                                    | unknown                                                               | has signal peptide                                                           |
| 255764503 | 537021.9.peg.705 | hypothetical protein                                        | hypothetical protein                                                                                                                                    | unknown                                                               | transmembrane protein                                                        |
| 254780540 | 537021.9.peg.706 | ABC transporter, membrane spanning protein (iron transport) | Manganese ABC transporter, inner membrane permease protein SitD                                                                                         | ABC-type importer for Manganese and iron, transmembrane component     | transmembrane protein                                                        |
| 254780539 | 537021.9.peg.707 | ABC transporter, membrane spanning protein (iron)           | Manganese ABC transporter, inner membrane permease protein SitC                                                                                         | ABC-type importer for Manganese and iron, transmembrane component     | transmembrane protein                                                        |
| 254780538 | 537021.9.peg.708 | ABC transporter, nucleotide binding/ATPase protein (iron)   | Manganese ABC transporter, ATP-binding protein SitB                                                                                                     | ABC-type importer for Manganese and iron, ATPase component            |                                                                              |
| 254780537 | 537021.9.peg.709 | periplasmic solute binding protein                          | Manganese ABC transporter, periplasmic-binding protein SitA                                                                                             | ABC-type importer for Manganese and iron, substrate-binding component | has signal peptide                                                           |
| 254780536 | 537021.9.peg.710 | acyl-carrier-protein S-malonyltransferase                   | Malonyl CoA-acyl carrier protein transacylase (EC 2.3.1.39)                                                                                             | acyl-carrier-protein S-malonyltransferase (EC 2.3.1.39)               |                                                                              |
| 254780535 | 537021.9.peg.711 | 3-ketoacyl-(acyl-carrier-protein) reductase                 | 3-oxoacyl-[acyl-carrier protein] reductase (EC 1.1.1.100)                                                                                               | 3-ketoacyl-(acyl-carrier-protein) reductase (EC 1.1.1.100)            |                                                                              |
| 254780534 | 537021.9.peg.712 | acyl carrier protein                                        | Acyl carrier protein                                                                                                                                    | acyl carrier protein                                                  |                                                                              |
| 254780533 | 537021.9.peg.713 | 3-oxoacyl-(acyl carrier protein) synthase II                | 3-oxoacyl-[acyl-carrier-protein] synthase, KASII (EC 2.3.1.41)                                                                                          | 3-oxoacyl-(acyl carrier protein) synthase II (EC 2.3.1.41)            |                                                                              |
| 254780532 | 537021.9.peg.714 | aminodeoxychorismate lyase                                  | FIG004453: protein YceG like                                                                                                                            | aminodeoxychorismate lyase, YceG-like                                 | transmembrane protein                                                        |
| 254780531 | 537021.9.peg.715 | flagellin domain-containing protein                         | Flagellin protein FlaA                                                                                                                                  | flagellin domain-containing protein                                   | extracellular, flagellar component, exported by flagellar assembly machinery |
| 254780530 | 537021.9.peg.716 | hypothetical protein                                        | hypothetical protein                                                                                                                                    | flagellar assembly protein H                                          |                                                                              |
| 254780529 | 537021.9.peg.717 | flagellar motor protein MotB                                | Flagellar motor rotation protein MotB                                                                                                                   | flagellar motor protein MotB                                          | transmembrane protein                                                        |
| 254780528 | 537021.9.peg.718 | chemotaxis protein                                          | chemotaxis motility protein                                                                                                                             | chemotaxis protein                                                    | has signal peptide                                                           |
| 254780527 | 537021.9.peg.719 | hypothetical protein                                        | hypothetical protein                                                                                                                                    | unknown                                                               |                                                                              |
| 254780526 | 537021.9.peg.720 | putative transcription regulator protein                    | Transcriptional regulator                                                                                                                               | transcriptional regulation protein                                    |                                                                              |
| 254780525 | 537021.9.peg.721 | flagellar hook protein FlgE                                 | Flagellar hook protein FlgE                                                                                                                             | flagellar hook protein FlgE                                           | extracellular, flagellar component, exported by                              |

|                  |                  |                                                                |                                                                                                                     |                                                                                                                     |                                                                              |
|------------------|------------------|----------------------------------------------------------------|---------------------------------------------------------------------------------------------------------------------|---------------------------------------------------------------------------------------------------------------------|------------------------------------------------------------------------------|
|                  |                  |                                                                |                                                                                                                     |                                                                                                                     | flagellar assembly machinery                                                 |
| <b>254780524</b> | 537021.9.peg.722 | flagellar hook-associated protein FlgK                         | Flagellar hook-associated protein FlgK                                                                              | flagellar hook-associated protein FlgK                                                                              | extracellular, flagellar component, exported by flagellar assembly machinery |
| <b>254780523</b> | 537021.9.peg.723 | flagellar hook-associated protein FlgL                         | putative flagellar hook-associated protein                                                                          | flagellar hook-associated protein FlgL                                                                              | extracellular, flagellar component, exported by flagellar assembly machinery |
| <b>254780522</b> | 537021.9.peg.724 | flagellar biosynthesis regulatory protein FlaF                 | putative flagellar synthesis related protein                                                                        | flagellar biosynthesis regulatory protein FlaF                                                                      |                                                                              |
| <b>254780521</b> | 537021.9.peg.725 | flagellar biosynthesis repressor FlbT                          | putative flagellum biosynthesis repressor protein                                                                   | flagellar biosynthesis repressor FlbT                                                                               |                                                                              |
| <b>254780520</b> | 537021.9.peg.726 | flagellar basal body rod modification protein                  | Flagellar basal-body rod modification protein FlgD                                                                  | flagellar basal body rod modification protein                                                                       | extracellular, flagellar component, exported by flagellar assembly machinery |
| <b>254780519</b> | 537021.9.peg.727 | flagellar biosynthesis protein FliQ                            | Flagellar biosynthesis protein FliQ                                                                                 | flagellar biosynthesis protein FliQ                                                                                 | transmembrane protein                                                        |
| <b>255764504</b> | 537021.9.peg.728 | DNA-methyltransferase MKpn2kI                                  | Cytosine-specific methyltransferase NlaX (EC 2.1.1.37) (M.NlaX)                                                     | type II DNA modification methyltransferase                                                                          | 1/2 of the protein                                                           |
| <b>254780516</b> | 537021.9.peg.729 | type II modification methyltransferase                         | Cytosine-specific methyltransferase NlaX (EC 2.1.1.37) (M.NlaX)                                                     | type II DNA modification methyltransferase                                                                          | 1/2 of the protein                                                           |
| <b>254780515</b> | 537021.9.peg.730 | hypothetical protein                                           | hypothetical protein                                                                                                | restriction endonuclease                                                                                            | 1/2 of the protein                                                           |
| <b>254780514</b> | N/A              | type II restriction endonuclease                               | N/A                                                                                                                 | restriction endonuclease                                                                                            | 1/2 of the protein                                                           |
| <b>254780512</b> | 537021.9.peg.731 | flagellar biosynthesis protein FlhA                            | Flagellar biosynthesis protein FlhA                                                                                 | flagellar biosynthesis protein FlhA                                                                                 | transmembrane protein                                                        |
| <b>254780511</b> | 537021.9.peg.732 | flagellar biosynthesis protein FliR                            | Flagellar biosynthesis protein FliR                                                                                 | flagellar biosynthesis protein FliR                                                                                 | transmembrane protein                                                        |
| <b>254780510</b> | 537021.9.peg.733 | hypothetical protein                                           | hypothetical protein                                                                                                | unknown                                                                                                             |                                                                              |
| <b>254780509</b> | 537021.9.peg.734 | hypothetical protein                                           | hypothetical protein                                                                                                | flgJ, peptidoglycan hydrolase                                                                                       |                                                                              |
| <b>254780508</b> | 537021.9.peg.735 | hypothetical protein                                           | hypothetical protein                                                                                                | unknown                                                                                                             |                                                                              |
| <b>254780507</b> | 537021.9.peg.736 | hypothetical protein                                           | hypothetical protein                                                                                                | unknown                                                                                                             | transmembrane protein                                                        |
| <b>254780506</b> | 537021.9.peg.737 | methylenetetrahydrofolate dehydrogenase/cyclohydrolase protein | Methylenetetrahydrofolate dehydrogenase (NADP+) (EC 1.5.1.5) / Methenyltetrahydrofolate cyclohydrolase (EC 3.5.4.9) | Methylenetetrahydrofolate dehydrogenase (NADP+) (EC 1.5.1.5) / Methenyltetrahydrofolate cyclohydrolase (EC 3.5.4.9) |                                                                              |
| <b>254780505</b> | 537021.9.peg.738 | 6-phosphogluconolactonase                                      | 6-phosphogluconolactonase (EC 3.1.1.31), eukaryotic type                                                            | 6-phosphogluconolactonase (EC 3.1.1.31)                                                                             |                                                                              |
| <b>254780504</b> | 537021.9.peg.739 | glucose-6-phosphate 1-dehydrogenase                            | Glucose-6-phosphate 1-dehydrogenase (EC 1.1.1.49)                                                                   | glucose-6-phosphate 1-dehydrogenase (EC 1.1.1.49)                                                                   |                                                                              |
| <b>254780503</b> | 537021.9.peg.740 | putative glutamine synthetase                                  | glutamine synthetase family protein                                                                                 | putative glutamine synthetase                                                                                       |                                                                              |
| <b>254780502</b> | 537021.9.peg.741 | ribonucleotide-diphosphate reductase subunit alpha             | Ribonucleotide reductase of class Ia (aerobic), alpha subunit (EC 1.17.4.1)                                         | ribonucleotide-diphosphate reductase subunit alpha (EC 1.17.4.1)                                                    |                                                                              |
| <b>254780500</b> | 537021.9.peg.742 | hypothetical protein                                           | hypothetical protein                                                                                                | Small protein A (tmRNA-binding)                                                                                     | transmembrane protein                                                        |
| <b>254780499</b> | 537021.9.peg.743 | hypothetical protein                                           | Functional role page for Conserved hypothetical protein, gene in Ubiquinol-cytochrome C chaperone locus             | unknown                                                                                                             |                                                                              |
| <b>254780498</b> | 537021.9.peg.744 | putative glycerol-3-phosphate acyltransferase PlsX             | Phosphate:acyl-ACP acyltransferase PlsX                                                                             | glycerol-3-phosphate acyltransferase                                                                                |                                                                              |
| <b>254780497</b> | 537021.9.peg.745 | 3-oxoacyl-(acyl carrier protein) synthase III                  | 3-oxoacyl-[acyl-carrier-protein] synthase, KASIII (EC 2.3.1.41)                                                     | 3-oxoacyl-(acyl carrier protein) synthase III (EC 2.3.1.41)                                                         |                                                                              |
| <b>254780496</b> | 537021.9.peg.746 | integration host factor subunit alpha                          | Integration host factor alpha subunit                                                                               | integration host factor subunit alpha                                                                               |                                                                              |
| <b>254780495</b> | 537021.9.peg.747 | superoxide dismutase                                           | Superoxide dismutase [Fe] (EC 1.15.1.1)                                                                             | superoxide dismutase (EC 1.15.1.1)                                                                                  |                                                                              |
| <b>254780494</b> | 537021.9.peg.748 | cation diffusion facilitator family transporter, putative      | Cobalt-zinc-cadmium resistance protein                                                                              | Co/Zn/Cd cation transporters                                                                                        | transmembrane protein                                                        |
| <b>254780493</b> | 537021.9.peg.749 | phosphoribosylaminoimidazole-succinocarboxamide synthase       | Phosphoribosylaminoimidazole-succinocarboxamide synthase (EC 6.3.2.6)                                               | phosphoribosylaminoimidazole-succinocarboxamide synthase (EC 6.3.2.6)                                               |                                                                              |
| <b>254780830</b> | N/A              | hypothetical protein                                           | N/A                                                                                                                 | unknown                                                                                                             |                                                                              |
| <b>254780831</b> | 537021.9.peg.750 | hypothetical protein                                           | Scaffold protein for [4Fe-4S] cluster assembly ApbC, MRP-like                                                       | ATPase                                                                                                              |                                                                              |
| <b>254780832</b> | 537021.9.peg.751 | putative potassium uptake transport system protein             | Kup system potassium uptake protein                                                                                 | K+ transporter                                                                                                      | transmembrane protein                                                        |
| <b>254780833</b> | 537021.9.peg.752 | hypothetical protein                                           | von Willebrand factor type A                                                                                        | von Willebrand factor type A fused with TadE/F                                                                      | transmembrane protein,                                                       |

|           |                  |                                                               |                                                                                       |                                                                 |                                                       |
|-----------|------------------|---------------------------------------------------------------|---------------------------------------------------------------------------------------|-----------------------------------------------------------------|-------------------------------------------------------|
|           |                  |                                                               |                                                                                       | involved in pilus assembly                                      | but might be processed by cpaA and become periplasmic |
| N/A       | 537021.9.peg.753 | N/A                                                           | DNA polymerase III alpha subunit (EC 2.7.7.7)                                         | DNA polymerase III subunit alpha                                | 1/2 of the protein                                    |
| N/A       | 537021.9.peg.754 | N/A                                                           | hypothetical protein                                                                  | DNA polymerase III subunit alpha                                | 1/2 of the protein                                    |
| 254780834 | 537021.9.peg.755 | DNA primase                                                   | DNA primase (EC 2.7.7.-)                                                              | DNA primase (EC 2.7.7.-)                                        |                                                       |
| 255764505 | 537021.9.peg.756 | polysialic acid capsule expression protein                    | Arabinose 5-phosphate isomerase (EC 5.3.1.13)                                         | sugar phosphate isomerase involved in capsule formation         |                                                       |
| 254780836 | 537021.9.peg.757 | putative type I restriction-modification system DNA methylase | Type I restriction-modification system, DNA-methyltransferase subunit M (EC 2.1.1.72) | Type I restriction-modification system, adenine methylase       |                                                       |
| 254780837 | 537021.9.peg.758 | putative restriction endonuclease S subunit                   | Type I restriction-modification system, specificity subunit S (EC 3.1.21.3)           | EcokI restriction-modification system protein, HsdS             |                                                       |
| 254780840 | 537021.9.peg.760 | hypothetical protein                                          | hypothetical protein                                                                  | unknown                                                         |                                                       |
| 254780841 | 537021.9.peg.761 | phosphatidylcholine synthase protein                          | Phosphatidylcholine synthase (EC 2.7.8.24)                                            | phosphatidylcholine synthase protein (EC 2.7.8.24)              | transmembrane protein                                 |
| 254780842 | 537021.9.peg.762 | 2-octaprenyl-6-methoxyphenyl hydroxylase                      | hypothetical protein                                                                  | 2-octaprenyl-6-methoxyphenyl hydroxylase (EC 1.14.13.-)         |                                                       |
| 254780843 | 537021.9.peg.763 | glucose/galactose transporter                                 | glucose/galactose transporter                                                         | glucose/galactose/fucose transporter                            | transmembrane protein                                 |
| 254780844 | 537021.9.peg.764 | hypothetical protein                                          | hypothetical protein                                                                  | unknown                                                         | has signal peptide                                    |
| 254780845 | 537021.9.peg.765 | ribonucleotide-diphosphate reductase subunit beta             | Ribonucleotide reductase of class Ia (aerobic), beta subunit (EC 1.17.4.1)            | ribonucleotide-diphosphate reductase subunit beta (EC 1.17.4.1) |                                                       |
| 254780846 | 537021.9.peg.766 | bifunctional riboflavin kinase/FMN adenylyltransferase        | Riboflavin kinase (EC 2.7.1.26) / FMN adenylyltransferase (EC 2.7.7.2)                | bifunctional riboflavin kinase/FMN adenylyltransferase          |                                                       |
| 254780847 | 537021.9.peg.767 | hypothetical protein                                          | HAD superfamily protein involved in N-acetyl-glucosamine catabolism                   | sugar phosphatase/HAD superfamily hydrolase                     |                                                       |
| 254780848 | 537021.9.peg.768 | co-chaperonin GroES                                           | Heat shock protein 60 family co-chaperone GroES                                       | co-chaperonin GroES                                             |                                                       |
| 254780849 | 537021.9.peg.769 | chaperonin GroEL                                              | Heat shock protein 60 family chaperone GroEL                                          | chaperonin GroEL                                                |                                                       |
| 254780852 | 537021.9.peg.770 | NADH dehydrogenase subunit A                                  | NADH ubiquinone oxidoreductase chain A (EC 1.6.5.3)                                   | NADH dehydrogenase subunit A (EC 1.6.5.3)                       | transmembrane protein                                 |
| 254780853 | 537021.9.peg.771 | NADH dehydrogenase subunit B                                  | NADH-ubiquinone oxidoreductase chain B (EC 1.6.5.3)                                   | NADH dehydrogenase subunit B (EC 1.6.5.3)                       |                                                       |
| 254780854 | 537021.9.peg.772 | NADH dehydrogenase subunit C                                  | NADH-ubiquinone oxidoreductase chain C (EC 1.6.5.3)                                   | NADH dehydrogenase subunit C (EC 1.6.5.3)                       |                                                       |
| 254780855 | 537021.9.peg.773 | NADH dehydrogenase subunit D                                  | NADH-ubiquinone oxidoreductase chain D (EC 1.6.5.3)                                   | NADH dehydrogenase subunit D (EC 1.6.5.3)                       |                                                       |
| 254780856 | 537021.9.peg.774 | NADH-quinone oxidoreductase, E subunit                        | NADH-ubiquinone oxidoreductase chain E (EC 1.6.5.3)                                   | NADH-quinone oxidoreductase, E subunit (EC 1.6.5.3)             |                                                       |
| 254780858 | 537021.9.peg.775 | NADH dehydrogenase I subunit F                                | NADH-ubiquinone oxidoreductase chain F (EC 1.6.5.3)                                   | NADH dehydrogenase I subunit F (EC 1.6.5.3)                     |                                                       |
| 254780859 | 537021.9.peg.776 | NADH dehydrogenase subunit G                                  | NADH-ubiquinone oxidoreductase chain G (EC 1.6.5.3)                                   | NADH dehydrogenase subunit G (EC 1.6.5.3)                       |                                                       |
| 254780860 | 537021.9.peg.777 | NADH dehydrogenase subunit H                                  | NADH-ubiquinone oxidoreductase chain H (EC 1.6.5.3)                                   | NADH dehydrogenase subunit H (EC 1.6.5.3)                       | transmembrane protein                                 |
| 254780861 | 537021.9.peg.778 | NADH dehydrogenase subunit I                                  | NADH-ubiquinone oxidoreductase chain I (EC 1.6.5.3)                                   | NADH dehydrogenase subunit I (EC 1.6.5.3)                       |                                                       |
| 254780862 | 537021.9.peg.779 | NADH dehydrogenase subunit J                                  | NADH-ubiquinone oxidoreductase chain J (EC 1.6.5.3)                                   | NADH dehydrogenase subunit J (EC 1.6.5.3)                       | transmembrane protein                                 |
| 254780863 | N/A              | hypothetical protein                                          | N/A                                                                                   | NADH-ubiquinone oxidoreductase, chain 4L                        | transmembrane protein, 1/2 of the protein             |
| 254780864 | 537021.9.peg.780 | NADH-ubiquinone oxidoreductase, chain 4L                      | NADH-ubiquinone oxidoreductase chain K (EC 1.6.5.3)                                   | NADH-ubiquinone oxidoreductase, chain 4L                        | transmembrane protein, 1/2 of the protein             |
| 254780865 | 537021.9.peg.781 | NADH dehydrogenase subunit L                                  | NADH-ubiquinone oxidoreductase chain L (EC 1.6.5.3)                                   | NADH dehydrogenase subunit L (EC 1.6.5.3)                       | transmembrane protein                                 |
| 254780866 | 537021.9.peg.782 | NADH dehydrogenase subunit M                                  | NADH-ubiquinone oxidoreductase chain M (EC 1.6.5.3)                                   | NADH dehydrogenase subunit M (EC 1.6.5.3)                       | transmembrane protein                                 |
| 254780867 | 537021.9.peg.783 | NADH dehydrogenase subunit N                                  | NADH-ubiquinone oxidoreductase chain N (EC 1.6.5.3)                                   | NADH dehydrogenase subunit N (EC 1.6.5.3)                       | transmembrane protein                                 |
| 254780868 | 537021.9.peg.784 | birA bifunctional protein                                     | Biotin-protein ligase (EC 6.3.4.15)                                                   | birA bifunctional protein (EC 6.3.4.15)                         |                                                       |
| 254780869 | 537021.9.peg.785 | beta-lactamase domain-containing protein                      | Metallo-beta-lactamase family protein, RNA-specific                                   | beta-lactamase domain-containing protein, hydrolase             |                                                       |
| 254780870 | 537021.9.peg.787 | prolyl-tRNA synthetase                                        | Prolyl-tRNA synthetase (EC 6.1.1.15) Bacterial type                                   | prolyl-tRNA synthetase (EC 6.1.1.15)                            |                                                       |
| N/A       | 537021.9.peg.788 | N/A                                                           | Lipoprotein releasing system transmembrane protein LoIC                               | lipoprotein ABC transporter, permease protein                   | transmembrane protein, 1/2 of the protein             |
| N/A       | 537021.9.peg.789 | N/A                                                           | hypothetical protein                                                                  | lipoprotein ABC transporter, permease proteing                  | transmembrane protein, 1/2 of the protein             |
| 254780871 | 537021.9.peg.790 | lipoprotein-releasing system ATP-binding protein loID         | Lipoprotein releasing system ATP-binding protein LoID                                 | ABC-type exporter of lipoprotein, ATPase component              |                                                       |
| 254780872 | 537021.9.peg.791 | 3-demethylubiquinone-9 3-methyltransferase                    | 3-demethylubiquinone-9 3-methyltransferase (EC 2.1.1.64)                              | 3-demethylubiquinone-9 3-methyltransferase (EC 2.1.1.64)        |                                                       |
| 254780873 | 537021.9.peg.792 | aspartate kinase                                              | Aspartokinase (EC 2.7.2.4)                                                            | aspartate kinase (EC 2.7.2.4)                                   |                                                       |

|           |                  |                                                                       |                                                                                 |                                                                                   |                                 |
|-----------|------------------|-----------------------------------------------------------------------|---------------------------------------------------------------------------------|-----------------------------------------------------------------------------------|---------------------------------|
| 254780874 | 537021.9.peg.793 | peptide chain release factor 1                                        | Peptide chain release factor 1                                                  | Protein chain release factor A                                                    |                                 |
| 254780875 | 537021.9.peg.794 | protoporphyrinogen oxidase (methyltransferase) protein                | Methylase of polypeptide chain release factors                                  | Methylase of polypeptide chain release factor, HemK                               |                                 |
| 254780876 | 537021.9.peg.795 | hypothetical protein                                                  | Eukaryotic translation initiation factor 3 subunit 10                           | unknown                                                                           |                                 |
| 254780877 | 537021.9.peg.796 | ATP-dependent Clp protease, ATP-binding subunit protein               | ClpB protein                                                                    | ATP-dependent Clp protease, ATP-binding subunit                                   |                                 |
| 254780878 | 537021.9.peg.797 | hypothetical protein                                                  | hypothetical protein                                                            | unknown                                                                           | transmembrane protein           |
| 254780879 | 537021.9.peg.798 | hypothetical protein                                                  | Membrane proteins related to metalloendopeptidases                              | Membrane proteins related to metalloendopeptidase                                 | transmembrane protein           |
| 254780880 | N/A              | hypothetical protein                                                  | N/A                                                                             | unknown                                                                           |                                 |
| 254780881 | 537021.9.peg.799 | Mrp protein                                                           | Mrp protein                                                                     | unknown                                                                           |                                 |
| 254780882 | 537021.9.peg.800 | site-specific tyrosine recombinase XerC                               | Integrase                                                                       | site-specific tyrosine recombinase XerC                                           |                                 |
| 254780883 | 537021.9.peg.801 | hypothetical protein                                                  | YidD                                                                            | unknown                                                                           |                                 |
| 255764506 | 537021.9.peg.802 | GTP cyclohydrolase I                                                  | GTP cyclohydrolase I (EC 3.5.4.16) type 1                                       | GTP cyclohydrolase I (EC 3.5.4.16)                                                |                                 |
| 254780885 | 537021.9.peg.803 | hypothetical protein                                                  | hypothetical protein                                                            | pilus assembly protein, PlIZ                                                      |                                 |
| 254780886 | N/A              | hypothetical protein                                                  | N/A                                                                             | unknown                                                                           | has signal peptide, short piece |
| 254780889 | 537021.9.peg.805 | inosine 5'-monophosphate dehydrogenase                                | Inosine-5'-monophosphate dehydrogenase (EC 1.1.1.205)                           | inosine 5'-monophosphate dehydrogenase (EC 1.1.1.205)                             |                                 |
| 254780890 | 537021.9.peg.806 | hypothetical protein                                                  | hypothetical protein                                                            | unknown                                                                           |                                 |
| 254780891 | 537021.9.peg.807 | hypothetical protein                                                  | hypothetical protein                                                            | two component system sensory kinase                                               |                                 |
| 254780892 | 537021.9.peg.808 | probable two-component response regulator protein                     | miscellaneous; not classified regulator                                         | two-component response regulator                                                  |                                 |
| 254780893 | 537021.9.peg.809 | two component response regulator                                      | putative two-component response regulator transcriptional regulatory protein    | two component response regulator                                                  |                                 |
| 254780894 | 537021.9.peg.810 | hypothetical protein                                                  | Flagellar protein fliJ                                                          | possible flagellar protein fliJ                                                   |                                 |
| 254780895 | 537021.9.peg.811 | hypothetical protein                                                  | hypothetical protein                                                            | unknown                                                                           |                                 |
| 254780896 | 537021.9.peg.812 | ABC transporter membrane spanning protein (branched chain amino acid) | Branched-chain amino acid transport system permease protein LivM (TC 3.A.1.4.1) | ABC-type permease                                                                 | transmembrane protein           |
| 254780897 | 537021.9.peg.814 | trigger factor                                                        | Cell division trigger factor (EC 5.2.1.8)                                       | trigger factor                                                                    |                                 |
| 254780898 | 537021.9.peg.815 | hypothetical protein                                                  | hypothetical protein                                                            | tyrosine/serine phosphatase                                                       | has signal peptide              |
| N/A       | 537021.9.peg.816 | N/A                                                                   | DNA repair protein RadC                                                         | DNA repair protein RadC                                                           | 1/2 of the protein              |
| N/A       | 537021.9.peg.817 | N/A                                                                   | DNA repair protein RadC                                                         | DNA repair protein RadC                                                           | 1/2 of the protein              |
| 254780899 | 537021.9.peg.819 | methionine aminopeptidase                                             | Methionine aminopeptidase (EC 3.4.11.18)                                        | methionine aminopeptidase (EC 3.4.11.18)                                          |                                 |
| 254780900 | 537021.9.peg.820 | homoserine dehydrogenase                                              | Homoserine dehydrogenase (EC 1.1.1.3)                                           | homoserine dehydrogenase (EC 1.1.1.3)                                             |                                 |
| 254780901 | 537021.9.peg.821 | single-stranded-DNA-specific exonuclease protein                      | Single-stranded-DNA-specific exonuclease RecJ (EC 3.1.-.-)                      | single-stranded-DNA-specific exonuclease (EC 3.1.-.-)                             |                                 |
| 254780902 | 537021.9.peg.822 | isocitrate dehydrogenase                                              | Isocitrate dehydrogenase [NADP] (EC 1.1.1.42)                                   | isocitrate dehydrogenase (EC 1.1.1.42)                                            |                                 |
| 254780903 | 537021.9.peg.823 | two-component sensor histidine kinase protein                         | Two-component sensor histidine kinase PleC                                      | two-component sensor histidine kinase protein                                     | transmembrane protein           |
| 254780904 | 537021.9.peg.824 | tRNA/rRNA methyltransferase                                           | tRNA:Cm32/Um32 methyltransferase                                                | tRNA/rRNA methyltransferase                                                       |                                 |
| 254780905 | 537021.9.peg.825 | glutamate racemase                                                    | Glutamate racemase (EC 5.1.1.3)                                                 | glutamate racemase (EC 5.1.1.3)                                                   |                                 |
| 254780906 | 537021.9.peg.826 | hypothetical protein                                                  | hypothetical protein                                                            | unknown                                                                           | has signal peptide              |
| 254780907 | N/A              | hypothetical protein                                                  | N/A                                                                             | unknown                                                                           | has signal peptide              |
| 254780908 | 537021.9.peg.827 | hypothetical protein                                                  | hypothetical protein                                                            | unknown                                                                           |                                 |
| 254780909 | 537021.9.peg.828 | hypothetical protein                                                  | hypothetical protein                                                            | unknown                                                                           | has signal peptide              |
| 255764507 | 537021.9.peg.829 | guanylate kinase                                                      | Guanylate kinase (EC 2.7.4.8)                                                   | guanylate kinase (EC 2.7.4.8)                                                     |                                 |
| 254780911 | 537021.9.peg.830 | formyltetrahydrofolate deformylase                                    | Formyltetrahydrofolate deformylase (EC 3.5.1.10)                                | formyltetrahydrofolate deformylase (EC 3.5.1.10)                                  |                                 |
| 254780912 | 537021.9.peg.831 | hypothetical protein                                                  | hypothetical protein                                                            | unknown                                                                           |                                 |
| 254780913 | 537021.9.peg.832 | cold shock protein                                                    | Cold shock protein CspE                                                         | cold shock protein                                                                |                                 |
| 254780914 | 537021.9.peg.833 | hypothetical protein                                                  | hypothetical protein                                                            | unknown                                                                           | has signal peptide              |
| 254780915 | 537021.9.peg.835 | oligoendopeptidase F                                                  | Oligoendopeptidase F                                                            | oligoendopeptidase F                                                              |                                 |
| 254780916 | 537021.9.peg.836 | putative sigma-54-dependent transcription regulator protein           | two component, sigma54 specific, transcriptional regulator, Fis family          | transcriptional regulator and a receptor in two component system                  |                                 |
| 254780917 | 537021.9.peg.837 | ABC transporter, nucleotide binding/ATPase protein                    | Y4gM                                                                            | ABC-type exporter for multiple drug and lipid, transmembrane and ATPase component | transmembrane protein           |
| 254780918 | 537021.9.peg.838 | glycosyl transferase family protein                                   | Glycosyl transferase, group 2 family protein                                    | COG0463 Glycosyltransferases involved in cell wall                                |                                 |

|           |                  |                                                       |                                                                                                                                | biogenesis                                                                |                                                                              |
|-----------|------------------|-------------------------------------------------------|--------------------------------------------------------------------------------------------------------------------------------|---------------------------------------------------------------------------|------------------------------------------------------------------------------|
| 254780919 | 537021.9.peg.839 | dTDP-4-dehydrorhamnose 3,5-epimerase                  | dTDP-4-dehydrorhamnose 3,5-epimerase (EC 5.1.3.13)                                                                             | dTDP-4-dehydrorhamnose 3,5-epimerase (EC 5.1.3.13)                        |                                                                              |
| 254780920 | 537021.9.peg.840 | dTDP-glucose 4,6-dehydratase                          | dTDP-glucose 4,6-dehydratase (EC 4.2.1.46)                                                                                     | dTDP-glucose 4,6-dehydratase (EC 4.2.1.46)                                |                                                                              |
| 254780921 | 537021.9.peg.841 | dTDP-4-dehydrorhamnose reductase                      | dTDP-4-dehydrorhamnose reductase (EC 1.1.1.133)                                                                                | dTDP-4-dehydrorhamnose reductase (EC 1.1.1.133)                           |                                                                              |
| 254780922 | 537021.9.peg.842 | glucose-1-phosphate thymidyltransferase               | Glucose-1-phosphate thymidyltransferase (EC 2.7.7.24)                                                                          | glucose-1-phosphate thymidyltransferase (EC 2.7.7.24)                     |                                                                              |
| 254780923 | 537021.9.peg.843 | hypothetical protein                                  | hypothetical protein                                                                                                           | Lipopolysaccharide biosynthesis protein in cell wall biogenesis           |                                                                              |
| 254780924 | 537021.9.peg.844 | potassium-efflux system protein                       | Binding-protein-dependent transport systems inner membrane component:ATP/GTP-binding site motif A (P-loop) :TrkA-N:Potassium e | potassium-efflux system protein                                           | transmembrane protein                                                        |
| 254780925 | 537021.9.peg.845 | bifunctional preprotein translocase subunit SecD/SecF | Protein-export membrane protein SecD (TC 3.A.5.1.1) / Protein-export membrane protein SecF (TC 3.A.5.1.1)                      | Preprotein translocase subunit SecD/SecF                                  | transmembrane protein                                                        |
| 254780926 | 537021.9.peg.846 | hypothetical protein                                  | hypothetical protein                                                                                                           | unknown                                                                   |                                                                              |
| 254780927 | 537021.9.peg.847 | UDP-N-acetylglucosamine 1-carboxyvinyltransferase     | UDP-N-acetylglucosamine 1-carboxyvinyltransferase (EC 2.5.1.7)                                                                 | UDP-N-acetylglucosamine 1-carboxyvinyltransferase (EC 2.5.1.7)            |                                                                              |
| 254780928 | 537021.9.peg.848 | histidyl-tRNA synthetase                              | Histidyl-tRNA synthetase (EC 6.1.1.21)                                                                                         | histidyl-tRNA synthetase (EC 6.1.1.21)                                    |                                                                              |
| 254780929 | 537021.9.peg.849 | hypothetical protein                                  | hypothetical protein                                                                                                           | unknown                                                                   | has signal peptide                                                           |
| 254780930 | 537021.9.peg.850 | nodulation protein (outer membrane efflux protein)    | RND efflux system, outer membrane lipoprotein CmeC                                                                             | Type I secretion system outer membrane transport protein                  | has signal peptide                                                           |
| 254780932 | 537021.9.peg.853 | hypothetical protein                                  | hypothetical protein                                                                                                           | unknown                                                                   |                                                                              |
| 254780933 | 537021.9.peg.854 | valyl-tRNA synthetase                                 | Valyl-tRNA synthetase (EC 6.1.1.9)                                                                                             | valyl-tRNA synthetase (EC 6.1.1.9)                                        |                                                                              |
| 254780934 | 537021.9.peg.855 | hypothetical protein                                  | von Willebrand factor type A                                                                                                   | von Willebrand factor type A fused with TadE/F involved in pilus assembly | transmembrane protein, but might be processed by cpaA and become periplasmic |
| 254780935 | 537021.9.peg.856 | rare lipoprotein A                                    | Rare lipoprotein A precursor                                                                                                   | rare lipoprotein A                                                        | has signal peptide                                                           |
| 254780936 | 537021.9.peg.857 | hypothetical protein                                  | MII752 protein                                                                                                                 | unknown                                                                   |                                                                              |
| 254780937 | 537021.9.peg.858 | DNA-directed RNA polymerase subunit omega             | DNA-directed RNA polymerase omega subunit (EC 2.7.7.6)                                                                         | DNA-directed RNA polymerase subunit omega                                 |                                                                              |
| 254780938 | 537021.9.peg.859 | 4'-phosphopantetheinyl transferase                    | Holo-[acyl-carrier protein] synthase (EC 2.7.8.7)                                                                              | 4'-phosphopantetheinyl transferase (EC 2.7.8.7)                           |                                                                              |
| 254780939 | 537021.9.peg.860 | type I signal peptidase                               | Signal peptidase I (EC 3.4.21.89)                                                                                              | type I signal peptidase (EC 3.4.21.89)                                    | transmembrane protein                                                        |
| 254780940 | 537021.9.peg.861 | ribonuclease III                                      | Ribonuclease III (EC 3.1.26.3)                                                                                                 | ribonuclease III (EC 3.1.26.3)                                            |                                                                              |
| 254780941 | 537021.9.peg.862 | GTP-binding protein Era                               | GTP-binding protein Era                                                                                                        | GTP-binding protein Era                                                   |                                                                              |
| 254780942 | 537021.9.peg.863 | UDP-N-acetylglucosamine pyrophosphorylase protein     | N-acetylglucosamine-1-phosphate uridylyltransferase (EC 2.7.7.23) / Glucosamine-1-phosphate N-acetyltransferase (EC 2.3.1.157) | UDP-N-acetylglucosamine pyrophosphorylase (EC 2.7.7.23)                   |                                                                              |
| 254780943 | 537021.9.peg.864 | glucosamine--fructose-6-phosphate aminotransferase    | Glucosamine--fructose-6-phosphate aminotransferase [isomerizing] (EC 2.6.1.16)                                                 | glucosamine--fructose-6-phosphate aminotransferase (EC 2.6.1.16)          |                                                                              |
| 254780944 | 537021.9.peg.865 | hypothetical protein                                  | hypothetical protein                                                                                                           | unknown                                                                   | transmembrane protein                                                        |
| 254780945 | 537021.9.peg.866 | ATP-dependent DNA helicase RecG                       | ATP-dependent DNA helicase RecG (EC 3.6.1.-)                                                                                   | ATP-dependent DNA helicase RecG (EC 3.6.1.-)                              |                                                                              |
| 254780946 | 537021.9.peg.867 | hypothetical protein                                  | YgfY COG2938                                                                                                                   | unknown                                                                   |                                                                              |
| 254780947 | 537021.9.peg.868 | transcription-repair coupling factor                  | Transcription-repair coupling factor                                                                                           | transcription-repair coupling factor                                      |                                                                              |
| 254780948 | 537021.9.peg.870 | DNA repair protein RecO                               | DNA recombination and repair protein RecO                                                                                      | DNA repair protein RecO                                                   |                                                                              |
| 254780949 | 537021.9.peg.871 | tyrosyl-tRNA synthetase                               | Tyrosyl-tRNA synthetase (EC 6.1.1.1) cluster 1                                                                                 | tyrosyl-tRNA synthetase (EC 6.1.1.1)                                      |                                                                              |
| 255764508 | 537021.9.peg.872 | hypothetical protein                                  | hypothetical protein                                                                                                           | similar to YdcF-like protein, function unknown                            | transmembrane protein                                                        |
| 254780951 | 537021.9.peg.875 | hypothetical protein                                  | hypothetical protein                                                                                                           | unknown                                                                   | has signal peptide                                                           |
| 254780952 | 537021.9.peg.876 | DNA helicase II                                       | ATP-dependent DNA helicase UvrD/PcrA                                                                                           | DNA helicase II                                                           |                                                                              |
| 254780953 | 537021.9.peg.877 | OmpA/MotB                                             | OmpA/MotB domain protein                                                                                                       | outer membrane lipoprotein                                                | has signal peptide                                                           |
| 254780954 | 537021.9.peg.878 | hypothetical protein                                  | hypothetical protein                                                                                                           | Uncharacterized protein involved in outer membrane biogenesis             | has signal peptide                                                           |
| 254780955 | 537021.9.peg.879 | hypothetical protein                                  | hypothetical protein                                                                                                           | ClpXP protease specificity-enhancing factor, SspB                         |                                                                              |
| 254780956 | 537021.9.peg.881 | thymidylate synthase                                  | Thymidylate synthase (EC 2.1.1.45)                                                                                             | thymidylate synthase (EC 2.1.1.45)                                        |                                                                              |
| 254780957 | 537021.9.peg.882 | dihydrofolate reductase protein                       | Dihydrofolate reductase (EC 1.5.1.3)                                                                                           | dihydrofolate reductase protein (EC 1.5.1.3)                              |                                                                              |
| 254780958 | 537021.9.peg.883 | HflK protein                                          | HflK protein                                                                                                                   | Membrane protease subunit, hflK                                           | transmembrane protein                                                        |

|           |                  |                                                                |                                                                                                                        |                                                                       |                                    |
|-----------|------------------|----------------------------------------------------------------|------------------------------------------------------------------------------------------------------------------------|-----------------------------------------------------------------------|------------------------------------|
| 254780959 | 537021.9.peg.884 | putative hydrolase serine protease transmembrane protein       | HfIC protein                                                                                                           | Membrane protease subunit, hfIC                                       | has signal peptide                 |
| 254780960 | 537021.9.peg.886 | phosphoserine phosphatase SerB                                 | Phosphoserine phosphatase (EC 3.1.3.3)                                                                                 | phosphoserine phosphatase SerB (EC 3.1.3.3)                           |                                    |
| N/A       | 537021.9.peg.887 | N/A                                                            | tRNA delta(2)-isopentenylpyrophosphate transferase (EC 2.5.1.8)                                                        | tRNA delta(2)-isopentenylpyrophosphate transferase                    | 1/2 of the protein                 |
| N/A       | 537021.9.peg.888 | N/A                                                            | tRNA delta(2)-isopentenylpyrophosphate transferase (EC 2.5.1.8)                                                        | tRNA delta(2)-isopentenylpyrophosphate transferase                    | 1/2 of the protein                 |
| 254780961 | 537021.9.peg.890 | hypothetical protein                                           | hypothetical protein                                                                                                   | peptidase                                                             | transmembrane protein              |
| 254780962 | 537021.9.peg.891 | hypothetical protein                                           | GCN5-related N-acetyltransferase                                                                                       | part of GCN5-related N-acetyltransferase, only a piece                | strange, only piece of the protein |
| 254780963 | 537021.9.peg.892 | hypothetical protein                                           | hypothetical protein                                                                                                   | unknown                                                               | has signal peptide                 |
| 254780964 | 537021.9.peg.893 | ribonucleotide-diphosphate reductase subunit beta              | Ribonucleotide reductase of class Ia (aerobic), beta subunit (EC 1.17.4.1)                                             | ribonucleotide-diphosphate reductase subunit beta                     |                                    |
| 254780965 | 537021.9.peg.894 | hypothetical protein                                           | hypothetical protein                                                                                                   | unknown                                                               | has signal peptide                 |
| 254780966 | 537021.9.peg.895 | hypothetical protein                                           | hypothetical protein                                                                                                   | unknown                                                               |                                    |
| 254780967 | 537021.9.peg.896 | probable multidrug resistance transporter protein              | Drug resistance transporter, Bcr/CflA family                                                                           | multidrug resistance transporter                                      | transmembrane protein              |
| 254780968 | 537021.9.peg.897 | hypothetical protein                                           | Uncharacterized monothiol glutaredoxin ycf64-like                                                                      | Glutaredoxin-related protein                                          |                                    |
| 254780969 | 537021.9.peg.898 | hypothetical protein                                           | YrbA protein                                                                                                           | transcriptional regulator, BOLA                                       |                                    |
| 254780970 | 537021.9.peg.899 | phosphoribosylformylglycinamide synthase II                    | Phosphoribosylformylglycinamide synthase, synthetase subunit (EC 6.3.5.3)                                              | phosphoribosylformylglycinamide synthase II (EC 6.3.5.3)              |                                    |
| 254780971 | 537021.9.peg.900 | phosphoribosylformylglycinamide synthase I                     | Phosphoribosylformylglycinamide synthase, glutamine amidotransferase subunit (EC 6.3.5.3)                              | phosphoribosylformylglycinamide synthase I (EC 6.3.5.3)               |                                    |
| 254780972 | 537021.9.peg.901 | phosphoribosylformylglycinamide synthase, PurS protein         | Phosphoribosylformylglycinamide synthase, PurS subunit (EC 6.3.5.3)                                                    | phosphoribosylformylglycinamide synthase, PurS protein (EC 6.3.5.3)   |                                    |
| 254780973 | 537021.9.peg.902 | phosphoribosylaminoimidazole-succinocarboxamide synthase       | Phosphoribosylaminoimidazole-succinocarboxamide synthase (EC 6.3.2.6)                                                  | phosphoribosylaminoimidazole-succinocarboxamide synthase (EC 6.3.2.6) |                                    |
| 254780974 | 537021.9.peg.903 | adenylosuccinate lyase                                         | Adenylosuccinate lyase (EC 4.3.2.2)                                                                                    | adenylosuccinate lyase (EC 4.3.2.2)                                   |                                    |
| 254780975 | 537021.9.peg.904 | D-ribulose-5 phosphate 3-epimerase protein                     | Ribulose-phosphate 3-epimerase (EC 5.1.3.1)                                                                            | D-ribulose-5 phosphate 3-epimerase protein (EC 5.1.3.1)               |                                    |
| 254780976 | 537021.9.peg.906 | Holliday junction resolvase YqgF                               | Putative Holliday junction resolvase (EC 3.1.-.-)                                                                      | Holliday junction resolvase YqgF-like protein (EC 3.1.-.-)            |                                    |
| 254780977 | 537021.9.peg.907 | putative glutamyl-tRNA(Gln) amidotransferase subunit C protein | Aspartyl-tRNA(Asn) amidotransferase subunit C (EC 6.3.5.6), Glutamyl-tRNA(Gln) amidotransferase subunit C (EC 6.3.5.7) | aspartyl/glutamyl-tRNA amidotransferase subunit C (EC 6.3.5.6)        |                                    |
| 254780978 | 537021.9.peg.908 | aspartyl/glutamyl-tRNA amidotransferase subunit A              | Aspartyl-tRNA(Asn) amidotransferase subunit A (EC 6.3.5.6), Glutamyl-tRNA(Gln) amidotransferase subunit A (EC 6.3.5.7) | aspartyl/glutamyl-tRNA amidotransferase subunit A (EC 6.3.5.6)        |                                    |
| 254780979 | 537021.9.peg.909 | aspartyl/glutamyl-tRNA amidotransferase subunit B              | Aspartyl-tRNA(Asn) amidotransferase subunit B (EC 6.3.5.6), Glutamyl-tRNA(Gln) amidotransferase subunit B (EC 6.3.5.7) | aspartyl/glutamyl-tRNA amidotransferase subunit B (EC 6.3.5.6)        |                                    |
| 254780980 | 537021.9.peg.910 | hypothetical protein                                           | hypothetical protein                                                                                                   | unknown                                                               | has signal peptide                 |
| 254780981 | N/A              | hypothetical protein                                           | N/A                                                                                                                    | unknown                                                               | has signal peptide                 |
| 254780982 | 537021.9.peg.914 | putative homoserine/homoserine lactone efflux protein          | putative homoserine/homoserine lactone efflux protein                                                                  | efflux system, permease                                               | transmembrane protein              |
| 254780983 | 537021.9.peg.915 | hypothetical protein                                           | hypothetical protein                                                                                                   | unknown                                                               |                                    |
| 254780984 | N/A              | hypothetical protein                                           | N/A                                                                                                                    | unknown                                                               | has signal peptide                 |
| 254780985 | 537021.9.peg.917 | hypothetical protein                                           | hypothetical protein                                                                                                   | unknown                                                               |                                    |
| 254780986 | 537021.9.peg.918 | hypothetical protein                                           | hypothetical protein                                                                                                   | unknown                                                               | transmembrane protein              |
| 254780987 | 537021.9.peg.919 | hypothetical protein                                           | hypothetical protein                                                                                                   | transcriptional regulator                                             |                                    |
| 254780988 | 537021.9.peg.920 | hypothetical protein                                           | hypothetical protein                                                                                                   | unknown                                                               | transmembrane protein              |
| 254780989 | 537021.9.peg.921 | GCN5-related N-acetyltransferase                               | GCN5-related N-acetyltransferase                                                                                       | N-acetyltransferase                                                   |                                    |
| 254780991 | 537021.9.peg.922 | excinuclease ABC subunit B                                     | Excinuclease ABC subunit B                                                                                             | excinuclease ABC subunit B, uvrB                                      |                                    |
| 254780992 | 537021.9.peg.923 | acyl-CoA hydrolase                                             | acyl-CoA hydrolase                                                                                                     | acyl-CoA hydrolase                                                    |                                    |
| 254780993 | 537021.9.peg.924 | hypothetical protein                                           | hypothetical protein                                                                                                   | permease                                                              | transmembrane protein              |
| 254780994 | 537021.9.peg.925 | hypothetical protein                                           | hypothetical protein                                                                                                   | unknown                                                               |                                    |
| 254780995 | 537021.9.peg.926 | Endonuclease/exonuclease/phosphatase                           | hypothetical protein                                                                                                   | exonuclease                                                           | 1/2 of the protein                 |

|           |                  |                                                                           |                                                                                        |                                                                                         |                                              |
|-----------|------------------|---------------------------------------------------------------------------|----------------------------------------------------------------------------------------|-----------------------------------------------------------------------------------------|----------------------------------------------|
| 254780996 | 537021.9.peg.927 | hypothetical protein                                                      | hypothetical protein                                                                   | exonuclease                                                                             | 1/2 of the protein                           |
| 254780998 | 537021.9.peg.928 | hypothetical protein                                                      | Sulfur acceptor protein SufE for iron-sulfur cluster assembly                          | SufE protein probably involved in Fe-S cluster assembly                                 |                                              |
| 254780999 | 537021.9.peg.929 | NAD synthetase                                                            | NAD synthetase (EC 6.3.1.5) / Glutamine amidotransferase chain of NAD synthetase       | NAD synthetase (EC 6.3.1.5)                                                             |                                              |
| 254781000 | 537021.9.peg.932 | tRNA (uracil-5-)-methyltransferase                                        | tRNA (Uracil54-C5-)-methyltransferase (EC 2.1.1.35)                                    | tRNA (uracil-5-)-methyltransferase                                                      |                                              |
| 254781001 | 537021.9.peg.933 | hypothetical protein                                                      | hypothetical protein                                                                   | unknown                                                                                 |                                              |
| 254781002 | 537021.9.peg.934 | hypothetical protein                                                      | hypothetical protein                                                                   | unknown                                                                                 | transmembrane protein                        |
| 254781003 | 537021.9.peg.935 | hypothetical protein                                                      | hypothetical protein                                                                   | endonuclease                                                                            | has signal peptide                           |
| 254781004 | 537021.9.peg.936 | threonyl-tRNA synthetase                                                  | Threonyl-tRNA synthetase (EC 6.1.1.3)                                                  | threonyl-tRNA synthetase (EC 6.1.1.3)                                                   |                                              |
| 254781005 | 537021.9.peg.938 | hypothetical protein                                                      | hypothetical protein                                                                   | unknown                                                                                 | has signal peptide                           |
| 254781006 | 537021.9.peg.939 | ribonucleotide-diphosphate reductase subunit beta                         | Ribonucleotide reductase of class Ia (aerobic), beta subunit (EC 1.17.4.1)             | ribonucleotide-diphosphate reductase subunit beta                                       |                                              |
| 254781007 | 537021.9.peg.940 | hypothetical protein                                                      | hypothetical protein                                                                   | unknown                                                                                 | has signal peptide                           |
| 254781008 | 537021.9.peg.941 | hypothetical protein                                                      | hypothetical protein                                                                   | unknown                                                                                 |                                              |
| 254781009 | 537021.9.peg.943 | hypothetical protein                                                      | Flagellar basal-body rod protein FlgF                                                  | unknown                                                                                 |                                              |
| 254781010 | 537021.9.peg.944 | hypothetical protein                                                      | hypothetical protein                                                                   | unknown                                                                                 | has signal peptide                           |
| 254781011 | 537021.9.peg.946 | orotate phosphoribosyltransferase                                         | Orotate phosphoribosyltransferase (EC 2.4.2.10)                                        | orotate phosphoribosyltransferase (EC 2.4.2.10)                                         |                                              |
| 254781012 | 537021.9.peg.947 | dihydroorotase                                                            | Dihydroorotase (EC 3.5.2.3)                                                            | dihydroorotase (EC 3.5.2.3)                                                             |                                              |
| 254781013 | 537021.9.peg.948 | phage-associated protein                                                  | hypothetical protein                                                                   | phage associated protein                                                                | transmembrane protein                        |
| 254781014 | 537021.9.peg.949 | hypothetical protein                                                      | hypothetical protein                                                                   | unknown                                                                                 | has signal peptide                           |
| 254781015 | 537021.9.peg.951 | hypothetical protein                                                      | hypothetical protein                                                                   | unknown                                                                                 |                                              |
| 254781016 | 537021.9.peg.952 | diphosphomevalonate decarboxylase/isopentenyl-diphosphate delta-isomerase | Diphosphomevalonate decarboxylase (EC 4.1.1.33)                                        | diphosphomevalonate decarboxylase/isopentenyl-diphosphate delta-isomerase (EC 4.1.1.33) |                                              |
| 254781017 | 537021.9.peg.953 | GHMP kinase                                                               | Mevalonate kinase (EC 2.7.1.36)                                                        | GHMP kinase (EC 2.7.1.36)                                                               |                                              |
| 254781018 | 537021.9.peg.954 | GHMP kinase                                                               | Mevalonate kinase (EC 2.7.1.36)                                                        | GHMP kinase (EC 2.7.1.36)                                                               |                                              |
| 254781019 | 537021.9.peg.955 | hydroxymethylglutaryl-coenzyme A synthase                                 | Hydroxymethylglutaryl-CoA synthase (EC 2.3.3.10)                                       | hydroxymethylglutaryl-coenzyme A synthase (EC 2.3.3.10)                                 |                                              |
| 254781020 | 537021.9.peg.956 | isopentenyl pyrophosphate isomerase                                       | Isopentenyl-diphosphate delta-isomerase, FMN-dependent (EC 5.3.3.2)                    | isopentenyl pyrophosphate isomerase (EC 5.3.3.2)                                        |                                              |
| 255764509 | 537021.9.peg.957 | hydroxymethylglutaryl-coenzyme A (HMG-CoA) reductase                      | Hydroxymethylglutaryl-CoA reductase (EC 1.1.1.34)                                      | hydroxymethylglutaryl-coenzyme A (HMG-CoA) reductase (EC 1.1.1.34)                      |                                              |
| 254781022 | 537021.9.peg.958 | hypothetical protein                                                      | COG1988: Predicted membrane-bound metal-dependent hydrolases                           | possible membrane-bounded hydrolase                                                     | transmembrane protein                        |
| 254781024 | 537021.9.peg.959 | electron transfer flavoprotein-ubiquinone oxidoreductase                  | Electron transfer flavoprotein-ubiquinone oxidoreductase (EC 1.5.5.1)                  | electron transfer flavoprotein-ubiquinone oxidoreductase (EC 1.5.5.1)                   |                                              |
| 254781025 | 537021.9.peg.960 | deoxyuridine 5' 27-triphosphate nucleotidohydrolase                       | Deoxyuridine 5'-triphosphate nucleotidohydrolase (EC 3.6.1.23)                         | deoxyuridine 5' 27-triphosphate nucleotidohydrolase (EC 3.6.1.23)                       |                                              |
| 254781026 | 537021.9.peg.962 | hypothetical protein                                                      | MG(2+) CHELATASE FAMILY PROTEIN / ComM-related protein                                 | Mg chelatase-related protein                                                            | 1/3 of a protein                             |
| 254781027 | 537021.9.peg.963 | hypothetical protein                                                      | MG(2+) CHELATASE FAMILY PROTEIN / ComM-related protein                                 | Mg chelatase-related protein                                                            | 1/3 of a protein                             |
| 254781028 | 537021.9.peg.964 | putative Mg <sup>2+</sup> chelatase family protein                        | putative Mg <sup>2+</sup> chelatase family protein                                     | Mg chelatase-related protein                                                            | 1/3 of a protein                             |
| 254781029 | 537021.9.peg.965 | chemotaxis sensory transducer                                             | hypothetical protein                                                                   | unknown                                                                                 | transmembrane protein, has disordered domain |
| 254781031 | 537021.9.peg.966 | exsB protein                                                              | Queuosine Biosynthesis QueC ATPase                                                     | exsB/queuosine biosynthesis protein                                                     |                                              |
| 254781032 | 537021.9.peg.967 | hypothetical protein                                                      | Queuosine biosynthesis QueD, PTPS-I                                                    | 6-pyruvoyl-tetrahydropterin synthase                                                    |                                              |
| 254781033 | 537021.9.peg.968 | HemY domain-containing protein                                            | Homolog of E. coli HemY protein                                                        | HemY domain-containing protein                                                          | transmembrane protein                        |
| 254781034 | 537021.9.peg.969 | hypothetical protein                                                      | hypothetical protein                                                                   | unknown                                                                                 | transmembrane protein                        |
| 255764510 | 537021.9.peg.970 | uroporphyrinogen-III synthase                                             | Uroporphyrinogen-III synthase (EC 4.2.1.75)                                            | uroporphyrinogen-III synthase (EC 4.2.1.75)                                             |                                              |
| 254781036 | 537021.9.peg.971 | hypothetical protein                                                      | hypothetical protein                                                                   | unknown                                                                                 |                                              |
| 254781037 | 537021.9.peg.972 | porphobilinogen deaminase                                                 | Porphobilinogen deaminase (EC 2.5.1.61)                                                | porphobilinogen deaminase (EC 2.5.1.61)                                                 |                                              |
| 254781038 | 537021.9.peg.973 | putative DNA-binding/iron metalloprotein/AP endonuclease                  | YgiD/KaeI/Qri7 family, required for threonylcarbamoyladenine (t(6)A) formation in tRNA | Metal-dependent proteases                                                               |                                              |
| 254781039 | 537021.9.peg.974 | putative glycerol-3-phosphate dehydrogenase                               | Glycerol-3-phosphate dehydrogenase [NAD(P)+] (EC                                       | putative glycerol-3-phosphate dehydrogenase (EC                                         |                                              |

|                  |                   |                                                                      |                                                                                                           |                                                            |                       |
|------------------|-------------------|----------------------------------------------------------------------|-----------------------------------------------------------------------------------------------------------|------------------------------------------------------------|-----------------------|
|                  |                   |                                                                      | 1.1.1.94)                                                                                                 | 1.1.1.94)                                                  |                       |
| <b>254781040</b> | 537021.9.peg.975  | hypothetical protein                                                 | Protein of unknown function DUF55                                                                         | unknown                                                    |                       |
| <b>254781041</b> | 537021.9.peg.976  | succinate dehydrogenase protein, cytochrome b subunit                | Succinate dehydrogenase cytochrome b-556 subunit                                                          | succinate dehydrogenase protein, cytochrome b subunit      | transmembrane protein |
| <b>254781042</b> | 537021.9.peg.977  | succinate dehydrogenase hydrophobic membrane anchor                  | Succinate dehydrogenase hydrophobic membrane anchor protein                                               | succinate dehydrogenase hydrophobic membrane anchor        | transmembrane protein |
| <b>254781043</b> | 537021.9.peg.978  | succinate dehydrogenase flavoprotein subunit                         | Succinate dehydrogenase flavoprotein subunit (EC 1.3.99.1)                                                | succinate dehydrogenase flavoprotein subunit (EC 1.3.99.1) |                       |
| <b>254781044</b> | 537021.9.peg.979  | succinate dehydrogenase iron-sulfur subunit                          | Succinate dehydrogenase iron-sulfur protein (EC 1.3.99.1)                                                 | succinate dehydrogenase iron-sulfur subunit (EC 1.3.99.1)  |                       |
| <b>254781045</b> | 537021.9.peg.980  | outer membrane lipoprotein omp19                                     | hypothetical protein                                                                                      | unknown                                                    | has signal peptide    |
| <b>254781046</b> | 537021.9.peg.981  | hypothetical protein                                                 | hypothetical protein                                                                                      | unknown                                                    |                       |
| <b>254781047</b> | 537021.9.peg.982  | AFG1-family ATPase                                                   | hypothetical protein                                                                                      | AFG1-family ATPase                                         |                       |
| <b>254781048</b> | 537021.9.peg.983  | malate dehydrogenase                                                 | Malate dehydrogenase (EC 1.1.1.37)                                                                        | malate dehydrogenase (EC 1.1.1.37)                         |                       |
| <b>254781049</b> | 537021.9.peg.984  | succinyl-CoA synthetase subunit beta                                 | Succinyl-CoA ligase [ADP-forming] beta chain (EC 6.2.1.5)                                                 | succinyl-CoA synthetase subunit beta (EC 6.2.1.5)          |                       |
| <b>254781050</b> | 537021.9.peg.985  | succinyl-CoA synthetase subunit alpha                                | Succinyl-CoA ligase [ADP-forming] alpha chain (EC 6.2.1.5)                                                | succinyl-CoA synthetase subunit alpha (EC 6.2.1.5)         |                       |
| <b>254781051</b> | 537021.9.peg.986  | alpha-ketoglutarate decarboxylase                                    | 2-oxoglutarate dehydrogenase E1 component (EC 1.2.4.2)                                                    | alpha-ketoglutarate decarboxylase (EC 1.2.4.2)             |                       |
| <b>254781052</b> | 537021.9.peg.987  | dihydrolipoamide succinyltransferase                                 | Dihydrolipoamide succinyltransferase component (E2) of 2-oxoglutarate dehydrogenase complex (EC 2.3.1.61) | dihydrolipoamide succinyltransferase (EC 2.3.1.61)         |                       |
| <b>254781053</b> | 537021.9.peg.988  | dihydrolipoamide dehydrogenase                                       | Dihydrolipoamide dehydrogenase of 2-oxoglutarate dehydrogenase (EC 1.8.1.4)                               | dihydrolipoamide dehydrogenase (EC 1.8.1.4)                |                       |
| <b>254781054</b> | 537021.9.peg.989  | ribose-5-phosphate isomerase A                                       | Ribose 5-phosphate isomerase A (EC 5.3.1.6)                                                               | ribose-5-phosphate isomerase A (EC 1.8.1.7)                |                       |
| <b>254781055</b> | 537021.9.peg.990  | glutathione reductase                                                | Glutathione reductase (EC 1.8.1.7)                                                                        | glutathione reductase (EC 1.8.1.7)                         |                       |
| <b>254781056</b> | 537021.9.peg.991  | phage-related lysozyme                                               | prophage LambdaMc01, lysozyme( EC:3.2.1.17 )                                                              | phage-related lysozyme, degrade peptidoglycan              |                       |
| <b>254781057</b> | N/A               | hypothetical protein                                                 | N/A                                                                                                       | phage-related lysozyme, degrade peptidoglycan              | 1/2 of the protein    |
| <b>254781058</b> | 537021.9.peg.992  | phage-related lysozyme                                               | prophage LambdaMc01, lysozyme                                                                             | phage-related lysozyme, degrade peptidoglycan              | 1/2 of the protein    |
| <b>254781059</b> | 537021.9.peg.994  | cysteine desulfurase activator complex subunit SufB                  | Iron-sulfur cluster assembly protein SufB                                                                 | cysteine desulfurase activator complex subunit SufB        |                       |
| <b>254781060</b> | 537021.9.peg.995  | ABC transporter, nucleotide binding/ATPase protein                   | Iron-sulfur cluster assembly ATPase protein SufC                                                          | SufC, ABC-type ATPase involve in Fe-S cluster assembly     |                       |
| <b>254781061</b> | 537021.9.peg.996  | putative iron-sulfur cluster assembly protein                        | Iron-sulfur cluster assembly protein SufD                                                                 | SufD, ABC-transporter involve in Fe-S cluster assembly     |                       |
| <b>254781062</b> | 537021.9.peg.997  | putative aminotransferase involved in iron-sulfur cluster biogenesis | Cysteine desulfurase (EC 2.8.1.7), SufS subfamily                                                         | cystein Desulfurase, SufS (EC 2.8.1.7)                     |                       |
| <b>254781063</b> | 537021.9.peg.998  | hypothetical protein                                                 | PaaD-like protein (DUF59) involved in Fe-S cluster assembly                                               | metal-sulfur cluster biosynthetic enzyme                   |                       |
| <b>254781064</b> | 537021.9.peg.999  | FeS assembly scaffold SufA                                           | Iron binding protein SufA for iron-sulfur cluster assembly                                                | FeS assembly scaffold SufA                                 |                       |
| <b>254781065</b> | 537021.9.peg.1000 | L-lysine 2,3-aminomutase protein                                     | Lysine 2,3-aminomutase (EC 5.4.3.2)                                                                       | L-lysine 2,3-aminomutase protein (EC 5.4.3.2)              |                       |
| <b>254781066</b> | 537021.9.peg.1001 | putative lysyl-tRNA synthetase protein                               | Lysyl-tRNA synthetase-related protein                                                                     | lysyl-tRNA synthetase protein                              |                       |
| <b>254781067</b> | 537021.9.peg.1002 | elongation factor P                                                  | Translation elongation factor P                                                                           | elongation factor P                                        |                       |
| <b>254781068</b> | 537021.9.peg.1003 | hypothetical protein                                                 | hypothetical protein                                                                                      | glycoside hydrolase family protein                         | 1/4 of the protein    |
| <b>254781069</b> | 537021.9.peg.1004 | hypothetical protein                                                 | hypothetical protein                                                                                      | glycoside hydrolase family protein                         | 1/4 of the protein    |
| <b>254781070</b> | 537021.9.peg.1005 | hypothetical protein                                                 | hypothetical protein                                                                                      | glycoside hydrolase family protein                         | 1/4 of the protein    |
| <b>254781071</b> | 537021.9.peg.1006 | hypothetical protein                                                 | hypothetical protein                                                                                      | glycoside hydrolase family protein                         | 1/4 of the protein    |
| <b>254781072</b> | 537021.9.peg.1007 | hypothetical protein                                                 | hypothetical protein                                                                                      | unknown                                                    |                       |
| <b>254781073</b> | 537021.9.peg.1008 | coproporphyrinogen III oxidase                                       | Coproporphyrinogen III oxidase, aerobic (EC 1.3.3.3)                                                      | coproporphyrinogen III oxidase (EC 1.3.3.3)                |                       |
| <b>254781074</b> | 537021.9.peg.1009 | uracil-DNA glycosylase                                               | Uracil-DNA glycosylase, family 1                                                                          | uracil-DNA glycosylase                                     |                       |
| <b>254781075</b> | 537021.9.peg.1010 | hypothetical protein                                                 | hypothetical protein                                                                                      | unknown                                                    | transmembrane protein |
| <b>254781076</b> | 537021.9.peg.1011 | ribonuclease HIII                                                    | Ribonuclease HIII (EC 3.1.26.4)                                                                           | ribonuclease HIII (EC 3.1.26.4)                            |                       |
| <b>254781077</b> | 537021.9.peg.1012 | hypothetical protein                                                 | hypothetical protein                                                                                      | unknown                                                    |                       |
| <b>254781078</b> | 537021.9.peg.1013 | hypothetical protein                                                 | hypothetical protein                                                                                      | outer membrane protein                                     | has signal peptide    |



|           |                   |                                                                                     |                                                                                                                                                                                                                      |                                                                                                   |                                                                              |
|-----------|-------------------|-------------------------------------------------------------------------------------|----------------------------------------------------------------------------------------------------------------------------------------------------------------------------------------------------------------------|---------------------------------------------------------------------------------------------------|------------------------------------------------------------------------------|
| 254781079 | 537021.9.peg.1014 | diguanylate cyclase                                                                 | diguanylate cyclase (GGDEF domain)                                                                                                                                                                                   | diguanylate cyclase                                                                               | transmembrane protein                                                        |
| 254781080 | 537021.9.peg.1015 | hypothetical protein                                                                | COG3750: Uncharacterized protein conserved in bacteria                                                                                                                                                               | unknown                                                                                           |                                                                              |
| 254781081 | 537021.9.peg.1016 | hypothetical protein                                                                | hypothetical protein                                                                                                                                                                                                 | unknown                                                                                           |                                                                              |
| 254781082 | 537021.9.peg.1017 | hypothetical protein                                                                | hypothetical protein                                                                                                                                                                                                 | unknown                                                                                           |                                                                              |
| 254781083 | 537021.9.peg.1018 | hypothetical protein                                                                | hypothetical protein                                                                                                                                                                                                 | unknown                                                                                           |                                                                              |
| 254781084 | 537021.9.peg.1019 | hypothetical protein                                                                | hypothetical protein                                                                                                                                                                                                 | unknown                                                                                           |                                                                              |
| 254781085 | 537021.9.peg.1020 | F0F1 ATP synthase subunit B                                                         | ATP synthase B chain (EC 3.6.3.14)                                                                                                                                                                                   | F0F1 ATP synthase subunit B (EC 3.6.3.14)                                                         | transmembrane protein                                                        |
| 254781086 | 537021.9.peg.1021 | F0F1 ATP synthase subunit B'                                                        | ATP synthase B' chain (EC 3.6.3.14)                                                                                                                                                                                  | F0F1 ATP synthase subunit B' (EC 3.6.3.14)                                                        | transmembrane protein                                                        |
| 254781087 | 537021.9.peg.1022 | H+-transporting two-sector ATPase C subunit                                         | ATP synthase C chain (EC 3.6.3.14)                                                                                                                                                                                   | H+-transporting two-sector ATPase C subunit (EC 3.6.3.14)                                         | transmembrane protein                                                        |
| 254781088 | 537021.9.peg.1023 | F0F1 ATP synthase subunit A                                                         | ATP synthase A chain (EC 3.6.3.14)                                                                                                                                                                                   | F0F1 ATP synthase subunit A (EC 3.6.3.14)                                                         | transmembrane protein                                                        |
| 254781089 | 537021.9.peg.1024 | hypothetical protein                                                                | hypothetical protein                                                                                                                                                                                                 | unknown                                                                                           |                                                                              |
| 254781090 | 537021.9.peg.1025 | hypothetical protein                                                                | hypothetical protein                                                                                                                                                                                                 | unknown                                                                                           |                                                                              |
| 254781091 | 537021.9.peg.1026 | putative pyridoxal-phosphate-dependent aminotransferase protein                     | Cysteine desulfurase (EC 2.8.1.7)                                                                                                                                                                                    | pyridoxal-phosphate-dependent aminotransferase protein (EC 2.8.1.7)                               |                                                                              |
| 254781093 | 537021.9.peg.1027 | hypothetical protein                                                                | Alpha/beta hydrolase                                                                                                                                                                                                 | hydrolase                                                                                         |                                                                              |
| 254781094 | 537021.9.peg.1028 | glycyl-tRNA synthetase subunit beta                                                 | Glycyl-tRNA synthetase beta chain (EC 6.1.1.14)                                                                                                                                                                      | glycyl-tRNA synthetase subunit beta (EC 6.1.1.14)                                                 |                                                                              |
| 254781095 | 537021.9.peg.1029 | UDP-N-acetylenolpyruvoylglucosamine reductase                                       | UDP-N-acetylenolpyruvoylglucosamine reductase (EC 1.1.1.158)                                                                                                                                                         | UDP-N-acetylenolpyruvoylglucosamine reductase (EC 1.1.1.158)                                      |                                                                              |
| 254781096 | 537021.9.peg.1030 | UDP-N-acetylmuramate--L-alanine ligase                                              | UDP-N-acetylmuramate--alanine ligase (EC 6.3.2.8)                                                                                                                                                                    | UDP-N-acetylmuramate--L-alanine ligase (EC 6.3.2.8)                                               |                                                                              |
| 254781097 | 537021.9.peg.1031 | N-acetylglucosaminyl transferase                                                    | UDP-N-acetylglucosamine--N-acetylmuramyl-(pentapeptide) pyrophosphoryl-undecaprenol N-acetylglucosamine transferase (EC 2.4.1.227)                                                                                   | N-acetylglucosaminyl transferase                                                                  |                                                                              |
| 254781098 | 537021.9.peg.1032 | cell division protein FtsW peptidoglycan synthesis                                  | Cell division protein FtsW                                                                                                                                                                                           | cell division protein FtsW peptidoglycan synthetase                                               | transmembrane protein                                                        |
| 254781099 | 537021.9.peg.1033 | UDP-N-acetylmuramoyl-L-alanyl-D-glutamate synthetase                                | UDP-N-acetylmuramoylalanine--D-glutamate ligase (EC 6.3.2.9)                                                                                                                                                         | UDP-N-acetylmuramoyl-L-alanyl-D-glutamate synthetase (EC 6.3.2.9)                                 |                                                                              |
| 254781100 | 537021.9.peg.1034 | phospho-N-acetylmuramoyl-pentapeptide-transferase                                   | Phospho-N-acetylmuramoyl-pentapeptide-transferase (EC 2.7.8.13)                                                                                                                                                      | phospho-N-acetylmuramoyl-pentapeptide-transferase (EC 2.7.8.13)                                   | transmembrane protein                                                        |
| 254781101 | 537021.9.peg.1035 | UDP-N-acetylmuramoylalanyl-D-glutamyl-2, 6-diaminopimelate/D-alanyl-D-alanyl ligase | UDP-N-acetylmuramoylalanyl-D-glutamyl-2,6-diaminopimelate--D-alanyl-D-alanine ligase (EC 6.3.2.10)                                                                                                                   | UDP-N-acetylmuramoylalanyl-D-glutamyl-2, 6-diaminopimelate/D-alanyl-D-alanyl ligase (EC 6.3.2.10) |                                                                              |
| 254781102 | 537021.9.peg.1036 | UDP-N-acetylmuramoylalanyl-D-glutamate--2, 6-diaminopimelate ligase                 | UDP-N-acetylmuramoylalanyl-D-glutamate--2,6-diaminopimelate ligase (EC 6.3.2.13)                                                                                                                                     | UDP-N-acetylmuramoylalanyl-D-glutamate--2,6-diaminopimelate ligase (EC 6.3.2.13)                  |                                                                              |
| 254781103 | 537021.9.peg.1037 | penicillin-binding transmembrane protein                                            | Cell division protein FtsI [Peptidoglycan synthetase] (EC 2.4.1.129)                                                                                                                                                 | penicillin-binding transmembrane protein (EC 2.4.1.129)                                           | transmembrane protein                                                        |
| 254781104 | 537021.9.peg.1038 | hypothetical protein                                                                | hypothetical protein                                                                                                                                                                                                 | unknown                                                                                           | transmembrane protein                                                        |
| 255764511 | 537021.9.peg.1039 | S-adenosyl-methyltransferase MraW                                                   | rRNA small subunit methyltransferase H                                                                                                                                                                               | S-adenosyl-methyltransferase MraW                                                                 |                                                                              |
| 254781106 | 537021.9.peg.1040 | cell division protein MraZ                                                          | Cell division protein MraZ                                                                                                                                                                                           | cell division protein MraZ                                                                        |                                                                              |
| 254781107 | 537021.9.peg.1041 | phosphoglucomutase                                                                  | Phosphoglucomutase (EC 5.4.2.2)                                                                                                                                                                                      | phosphoglucomutase (EC 5.4.2.2)                                                                   |                                                                              |
| 254781108 | 537021.9.peg.1042 | von Willebrand factor type A                                                        | hypothetical protein                                                                                                                                                                                                 | von Willebrand factor type A fused with TadE/F involved in pilus assembly                         | transmembrane protein, but might be processed by cpaA and become periplasmic |
| 254781109 | N/A               | hypothetical protein                                                                | N/A                                                                                                                                                                                                                  | unknown                                                                                           | transmembrane protein                                                        |
| 254781110 | 537021.9.peg.1043 | von Willebrand factor type A                                                        | conserved hypothetical protein                                                                                                                                                                                       | von Willebrand factor type A fused with TadE/F involved in pilus assembly                         | transmembrane protein, but might be processed by cpaA and become periplasmic |
| 254781111 | 537021.9.peg.1045 | geranyltranstransferase protein                                                     | Octaprenyl-diphosphate synthase (EC 2.5.1.-) / Dimethylallyltransferase (EC 2.5.1.1) / Geranyltranstransferase (farnesylidiphosphate synthase) (EC 2.5.1.10) / Geranylgeranyl pyrophosphate synthetase (EC 2.5.1.29) | geranyltranstransferase protein (EC 2.5.1.1)                                                      |                                                                              |
| 254781112 | 537021.9.peg.1046 | putative amino acid-binding periplasmic ABC transporter protein                     | PUTATIVE AMINO ACID-BINDING PERIPLASMIC ABC TRANSPORTER PROTEIN                                                                                                                                                      | ABC-type substrate binding protein                                                                | has signal peptide                                                           |

|           |                   |                                               |                                                                                                 |                                                                 |                                                                                                     |
|-----------|-------------------|-----------------------------------------------|-------------------------------------------------------------------------------------------------|-----------------------------------------------------------------|-----------------------------------------------------------------------------------------------------|
| 254781113 | 537021.9.peg.1047 | amino acid ABC transporter (permease)         | amino acid ABC transporter, permease protein                                                    | ABC-type permease                                               | transmembrane protein                                                                               |
| 254781114 | 537021.9.peg.1048 | glycosyl transferase family protein           | Beta-1,4-galactosyltransferase                                                                  | glycosyl transferase family protein                             |                                                                                                     |
| 254781115 | 537021.9.peg.1049 | poly(A) polymerase protein                    | tRNA nucleotidyltransferase (EC 2.7.7.21) (EC 2.7.7.25)                                         | poly(A) polymerase protein (EC 2.7.7.21) (EC 2.7.7.25)          |                                                                                                     |
| 255764512 | 537021.9.peg.1050 | preprotein translocase protein                | Preprotein translocase subunit YajC (TC 3.A.5.1.1)                                              | preprotein translocase protein, yajC                            | transmembrane protein                                                                               |
| 255764513 | 537021.9.peg.1051 | glutamyl-tRNA synthetase                      | Glutamyl-tRNA synthetase (EC 6.1.1.17), Glutamyl-tRNA(Gln) synthetase (EC 6.1.1.24) unambiguous | glutamyl-tRNA synthetase (EC 6.1.1.17)                          |                                                                                                     |
| 254781118 | 537021.9.peg.1052 | lysyl-tRNA synthetase                         | Lysyl-tRNA synthetase (class II) (EC 6.1.1.6)                                                   | lysyl-tRNA synthetase (EC 6.1.1.6)                              |                                                                                                     |
| 254781119 | 537021.9.peg.1053 | hypothetical protein                          | hypothetical protein                                                                            | unknown                                                         | transmembrane protein                                                                               |
| 254781120 | 537021.9.peg.1054 | radical SAM protein                           | Ribosomal RNA large subunit methyltransferase N (EC 2.1.1.-)                                    | radical SAM protein                                             |                                                                                                     |
| 254781121 | 537021.9.peg.1055 | hypothetical protein                          | conserved hypothetical signal peptide protein                                                   | unknown                                                         | has signal peptide                                                                                  |
| 254781122 | 537021.9.peg.1056 | putative thiamine pyrophosphokinase           | Thiamin pyrophosphokinase (EC 2.7.6.2)                                                          | thiamine pyrophosphokinase (EC 2.7.6.2)                         |                                                                                                     |
| 254781123 | 537021.9.peg.1057 | putative ABC transporter, ATP-binding protein | ABC transporter, ATP-binding protein                                                            | ABC-type ATPase involved in transposon excision regulation, Uup |                                                                                                     |
| 254781124 | N/A               | hypothetical protein                          | N/A                                                                                             | unknown                                                         |                                                                                                     |
| 254781126 | N/A               | hypothetical protein                          | N/A                                                                                             | unknown                                                         |                                                                                                     |
| 254781127 | 537021.9.peg.1059 | hypothetical protein                          | hypothetical protein                                                                            | unknown                                                         |                                                                                                     |
| 254781128 | 537021.9.peg.1060 | hypothetical protein                          | hypothetical protein                                                                            | outer membrane protein                                          | has signal peptide                                                                                  |
| 254781129 | 537021.9.peg.1061 | hypothetical protein                          | hypothetical protein                                                                            | unknown                                                         |                                                                                                     |
| 254781130 | 537021.9.peg.1062 | hypothetical protein                          | hypothetical protein                                                                            | unknown                                                         |                                                                                                     |
| 254781131 | 537021.9.peg.1063 | hypothetical protein                          | hypothetical protein                                                                            | unknown                                                         | 1/2 of the protein                                                                                  |
| N/A       | 537021.9.peg.1064 | N/A                                           | hypothetical protein                                                                            | unknown                                                         | has signal peptide, 1/2 of the protein                                                              |
| 254781133 | 537021.9.peg.1065 | hypothetical protein                          | hypothetical protein                                                                            | N-acetyltransferase                                             |                                                                                                     |
| 254781134 | 537021.9.peg.1066 | hypothetical protein                          | conserved hypothetical protein                                                                  | unknown                                                         | 1/3 of the protein                                                                                  |
| 254781135 | 537021.9.peg.1067 | hypothetical protein                          | hypothetical protein                                                                            | unknown                                                         | 1/3 of the protein                                                                                  |
| 254781136 | 537021.9.peg.1068 | hypothetical protein                          | hypothetical protein                                                                            | unknown                                                         | 1/3 of the protein                                                                                  |
| 254781137 | 537021.9.peg.1069 | hypothetical protein                          | conserved hypothetical protein                                                                  | unknown                                                         |                                                                                                     |
| 254781138 | 537021.9.peg.1070 | hypothetical protein                          | hypothetical protein                                                                            | unknown                                                         | should be phage protein                                                                             |
| 254781139 | 537021.9.peg.1071 | hypothetical protein                          | hypothetical protein                                                                            | unknown                                                         | 1/2 of a protein                                                                                    |
| 254781140 | 537021.9.peg.1072 | hypothetical protein                          | hypothetical protein                                                                            | unknown                                                         | 1/2 of a protein                                                                                    |
| N/A       | 537021.9.peg.1073 | N/A                                           | hypothetical protein                                                                            | phage major head protein                                        | 1/2 of the protein                                                                                  |
| N/A       | 537021.9.peg.1074 | N/A                                           | hypothetical protein                                                                            | phage major head protein                                        | 1/2 of the protein                                                                                  |
| 254781141 | 537021.9.peg.1075 | hypothetical protein                          | hypothetical protein                                                                            | unknown                                                         |                                                                                                     |
| 254781143 | N/A               | hypothetical protein                          | N/A                                                                                             | unknown                                                         |                                                                                                     |
| 254781144 | 537021.9.peg.1076 | hypothetical protein                          | putative portal protein                                                                         | unknown                                                         | 1/2 of the protein                                                                                  |
| 254781145 | 537021.9.peg.1077 | hypothetical protein                          | putative portal protein                                                                         | phage portal protein                                            | 1/2 of the protein                                                                                  |
| N/A       | 537021.9.peg.1078 | N/A                                           | PROBABLE DNA PACKAGING PROTEIN GP2                                                              | DNA packaging protein Gp2                                       | 1/3 of the protein                                                                                  |
| N/A       | 537021.9.peg.1079 | N/A                                           | PROBABLE DNA PACKAGING PROTEIN GP2                                                              | DNA packaging protein Gp2                                       | 1/3 of the protein                                                                                  |
| N/A       | 537021.9.peg.1080 | N/A                                           | PROBABLE DNA PACKAGING PROTEIN GP2                                                              | DNA packaging protein Gp2                                       | 1/3 of the protein                                                                                  |
| 254781146 | 537021.9.peg.1081 | hypothetical protein                          | hypothetical protein                                                                            | unknown                                                         |                                                                                                     |
| 254781147 | 537021.9.peg.1082 | transcriptional regulator                     | transcriptional regulator                                                                       | transcriptional regulator                                       |                                                                                                     |
| 254781148 | 537021.9.peg.1084 | hypothetical protein                          | hypothetical protein                                                                            | replicative DNA helicase                                        | 1/2 of the protein, but still too short to form a functional protein, the structure is not complete |
| 254781149 | 537021.9.peg.1085 | replicative DNA helicase                      | DnaB helicase                                                                                   | replicative DNA helicase                                        | 1/2 of the protein, but still too short to form a functional protein, the structure is not complete |
| N/A       | 537021.9.peg.1087 | N/A                                           | hypothetical protein                                                                            | just piece of phage protein                                     | piece of phage protein                                                                              |
| 254781150 | N/A               | hypothetical protein                          | N/A                                                                                             | replicative DNA helicase (only a piece of the protein)          |                                                                                                     |
| 254781151 | 537021.9.peg.1088 | hypothetical protein                          | hypothetical protein                                                                            | unknown                                                         | 1/2 of a protein                                                                                    |
| 254781152 | 537021.9.peg.1089 | hypothetical protein                          | hypothetical protein                                                                            | unknown                                                         | 1/2 of a protein                                                                                    |

|           |                   |                                                              |                                                                           |                                                                                  |                                                        |
|-----------|-------------------|--------------------------------------------------------------|---------------------------------------------------------------------------|----------------------------------------------------------------------------------|--------------------------------------------------------|
| 254781153 | N/A               | hypothetical protein                                         | N/A                                                                       | ribonucleotide-diphosphate reductase subunit beta (only a piece of that protein) | just a piece of the homologous protein, maybe not real |
| 254781154 | 537021.9.peg.1091 | hypothetical protein                                         | hypothetical protein                                                      | unknown                                                                          |                                                        |
| 254781155 | N/A               | hypothetical protein                                         | N/A                                                                       | unknown                                                                          |                                                        |
| 254781156 | 537021.9.peg.1092 | hypothetical protein                                         | hypothetical protein                                                      | unknown                                                                          | has signal peptide                                     |
| 254781157 | 537021.9.peg.1093 | hypothetical protein                                         | hypothetical protein                                                      | unknown                                                                          | has signal peptide                                     |
| 254781158 | 537021.9.peg.1094 | peptidyl prolyl cis-trans isomerase D signal peptide protein | hypothetical protein                                                      | Parvulin-like peptidyl-prolyl isomerase                                          | transmembrane protein                                  |
| 254781159 | 537021.9.peg.1095 | hypothetical protein                                         | hypothetical protein                                                      | unknown                                                                          | has signal peptide                                     |
| 254781160 | 537021.9.peg.1097 | 16S rRNA m3U1498 methyltransferase                           | Ribosomal RNA small subunit methyltransferase E (EC 2.1.1.-)              | 16S rRNA m3U1498 methyltransferase (EC 2.1.1.-)                                  |                                                        |
| 254781161 | 537021.9.peg.1098 | glutamate--cysteine ligase                                   | Glutamate--cysteine ligase (EC 6.3.2.2)                                   | glutamate--cysteine ligase (EC 6.3.2.2)                                          |                                                        |
| 254781162 | 537021.9.peg.1099 | GCN5-related N-acetyltransferase                             | Acetyltransferase (EC 2.3.1.-)                                            | acetyltransferase (EC 2.3.1.-)                                                   |                                                        |
| 254781163 | 537021.9.peg.1100 | hypothetical protein                                         | hypothetical protein                                                      | unknown                                                                          | transmembrane protein                                  |
| 254781164 | 537021.9.peg.1102 | hypothetical protein                                         | hypothetical protein                                                      | unknown                                                                          |                                                        |
| 254781165 | 537021.9.peg.1103 | pyridoxamine 5'-phosphate oxidase                            | Pyridoxamine 5'-phosphate oxidase (EC 1.4.3.5)                            | pyridoxamine 5'-phosphate oxidase (EC 1.4.3.5)                                   |                                                        |
| 254781166 | 537021.9.peg.1104 | enoyl-(acyl carrier protein) reductase                       | Enoyl-[acyl-carrier-protein] reductase [NADH] (EC 1.3.1.9)                | enoyl-(acyl carrier protein) reductase (EC 1.3.1.9)                              |                                                        |
| 254781167 | 537021.9.peg.1105 | tRNA-dihydrouridine synthase A                               | tRNA dihydrouridine synthase A (EC 1.-.-.-)                               | tRNA-dihydrouridine synthase A (EC 1.-.-.-)                                      |                                                        |
| 254781169 | 537021.9.peg.1106 | PTS system ascorbate-specific transporter subunit IIC        | Ascorbate-specific PTS system, EIIC component                             | PTS system, transporter                                                          | transmembrane protein                                  |
| 254781170 | 537021.9.peg.1108 | deoxyribodipyrimidine photolyase                             | Deoxyribodipyrimidine photolyase (EC 4.1.99.3)                            | deoxyribodipyrimidine photolyase (EC 4.1.99.3)                                   |                                                        |
| 254781171 | 537021.9.peg.1109 | hypothetical protein                                         | Proton/glutamate symport protein, Sodium/glutamate symport protein        | Na+/H+-dicarboxylate symporter                                                   | transmembrane protein                                  |
| 254781172 | 537021.9.peg.1110 | NAD-dependent DNA ligase LigA                                | DNA ligase (EC 6.5.1.2)                                                   | NAD-dependent DNA ligase LigA (EC 6.5.1.2)                                       |                                                        |
| 255764514 | 537021.9.peg.1111 | DNA repair protein RecN                                      | DNA repair protein RecN                                                   | DNA repair protein RecN                                                          |                                                        |
| 254781174 | 537021.9.peg.1112 | outer membrane assembly lipoprotein YfiO                     | Competence lipoprotein comL precursor                                     | outer membrane assembly lipoprotein YfiO, may involve in DNA uptake              | has signal peptide                                     |
| 254781175 | 537021.9.peg.1113 | UDP-3-O-[3-hydroxymyristoyl] N-acetylglucosamine deacetylase | UDP-3-O-[3-hydroxymyristoyl] N-acetylglucosamine deacetylase (EC 3.5.1.-) | UDP-3-O-[3-hydroxymyristoyl] N-acetylglucosamine deacetylase (EC 3.5.1.-)        |                                                        |
| 254781176 | 537021.9.peg.1114 | cell division protein FtsZ                                   | Cell division protein FtsZ (EC 3.4.24.-)                                  | cell division protein FtsZ                                                       |                                                        |
| 254781177 | 537021.9.peg.1115 | cell division protein                                        | Cell division protein FtsA                                                | cell division protein                                                            |                                                        |
| 254781178 | 537021.9.peg.1116 | cell division protein                                        | Cell division protein ftsQ                                                | cell division protein                                                            | transmembrane protein                                  |
| 254781179 | 537021.9.peg.1117 | D-alanine--D-alanine ligase                                  | D-alanine--D-alanine ligase (EC 6.3.2.4)                                  | D-alanine--D-alanine ligase (EC 6.3.2.4)                                         |                                                        |
| 254781180 | 537021.9.peg.1118 | hypothetical protein                                         | hypothetical protein                                                      | unknown                                                                          |                                                        |
| 254781181 | 537021.9.peg.1119 | hypothetical protein                                         | hypothetical protein                                                      | unknown                                                                          | transmembrane protein                                  |
| 254781182 | 537021.9.peg.1121 | hypothetical protein                                         | hypothetical protein                                                      | type I restriction enzyme                                                        | 1/2 of a protein                                       |
| 254781183 | 537021.9.peg.1122 | hypothetical protein                                         | hypothetical protein                                                      | unknown                                                                          | 1/2 of a protein                                       |
| 254781184 | 537021.9.peg.1124 | hypothetical protein                                         | hypothetical protein                                                      | unknown                                                                          | transmembrane protein                                  |
| 254781186 | 537021.9.peg.1125 | hypothetical protein                                         | hypothetical protein                                                      | phage protein, terminase large subunit                                           | 1/2 of a protein                                       |
| 254781187 | 537021.9.peg.1126 | putative phage terminase, large subunit                      | terminase B protein, putative                                             | phage protein, terminase large subunit                                           | 1/2 of a protein                                       |
| 254781188 | 537021.9.peg.1127 | hypothetical protein                                         | hypothetical protein                                                      | phage protein, terminase small subunit                                           |                                                        |
| 254781189 | 537021.9.peg.1129 | hypothetical protein                                         | hypothetical protein                                                      | unknown                                                                          | transmembrane protein                                  |
| 254781191 | 537021.9.peg.1131 | hypothetical protein                                         | Phage protein                                                             | unknown                                                                          |                                                        |
| 254781190 | 537021.9.peg.1130 | hypothetical protein                                         | DR0530-like primase                                                       | primase                                                                          |                                                        |
| 254781192 | 537021.9.peg.1132 | hypothetical protein                                         | conserved hypothetical protein                                            | single-strand DNA binding protein                                                |                                                        |
| 254781193 | 537021.9.peg.1133 | putative DNA polymerase from bacteriophage origin            | DNA polymerase, phage-associated                                          | DNA polymerase from bacteriophage                                                |                                                        |
| 254781194 | 537021.9.peg.1134 | hypothetical protein                                         | hypothetical protein                                                      | endonuclease                                                                     |                                                        |
| 255764515 | 537021.9.peg.1135 | SNF2 related                                                 | DNA helicase, phage-associated                                            | ATP-dependent helicase                                                           |                                                        |
| 254781196 | 537021.9.peg.1136 | DNA ligase, NAD-dependent                                    | DNA ligase, NAD-dependent                                                 | NAD-dependent DNA ligase                                                         | it is shorter than normal ones, only has one domain    |
| 254781197 | 537021.9.peg.1137 | guanylate kinase                                             | Guanylate kinase (EC 2.7.4.8)                                             | guanylate kinase                                                                 |                                                        |

|           |                   |                                            |                               |                                                             |                       |
|-----------|-------------------|--------------------------------------------|-------------------------------|-------------------------------------------------------------|-----------------------|
| 254781198 | 537021.9.peg.1138 | guanylate kinase                           | hypothetical protein          | unknown                                                     | transmembrane protein |
| 254781199 | 537021.9.peg.1139 | hypothetical protein                       | hypothetical protein          | unknown                                                     | transmembrane protein |
| N/A       | 537021.9.peg.1140 | N/A                                        | hypothetical protein          | unknown                                                     | transmembrane protein |
| 255764516 | 537021.9.peg.1141 | hypothetical protein                       | hypothetical protein          | unknown                                                     |                       |
| N/A       | 537021.9.peg.1142 | N/A                                        | hypothetical protein          | unknown                                                     |                       |
| 255764517 | 537021.9.peg.1143 | hypothetical protein                       | hypothetical protein          | unknown                                                     |                       |
| 254781202 | 537021.9.peg.1144 | hypothetical protein                       | hypothetical protein          | structural protein of bacteriophage                         |                       |
| 254781203 | 537021.9.peg.1145 | hypothetical protein                       | hypothetical protein          | unknown                                                     |                       |
| 254781204 | 537021.9.peg.1146 | hypothetical protein                       | hypothetical protein          | minor structure protein                                     |                       |
| 254781205 | 537021.9.peg.1147 | hypothetical protein                       | hypothetical protein          | unknown                                                     |                       |
| 254781206 | 537021.9.peg.1148 | hypothetical protein                       | hypothetical protein          | unknown                                                     |                       |
| 254781207 | 537021.9.peg.1149 | hypothetical protein                       | hypothetical protein          | unknown                                                     | has signal peptide    |
| 254781208 | 537021.9.peg.1150 | hypothetical protein                       | hypothetical protein          | unknown                                                     |                       |
| 254781209 | 537021.9.peg.1151 | hypothetical protein                       | hypothetical protein          | tail tubular protein A of bacteriophage                     |                       |
| 254781210 | 537021.9.peg.1152 | hypothetical protein                       | hypothetical protein          | major capsid protein                                        |                       |
| 254781211 | 537021.9.peg.1153 | hypothetical protein                       | hypothetical protein          | unknown                                                     |                       |
| 254781212 | 537021.9.peg.1154 | hypothetical protein                       | hypothetical protein          | unknown                                                     |                       |
| 254781213 | 537021.9.peg.1155 | head-to-tail joining protein, putative     | hypothetical protein          | bacteriophage head-to-tail joining protein                  |                       |
| 254781214 | 537021.9.peg.1156 | hypothetical protein                       | hypothetical protein          | unknown                                                     |                       |
| 254781215 | 537021.9.peg.1157 | putative phage terminase, large subunit    | terminase B protein, putative | phage terminase, large subunit                              |                       |
| 254781216 | 537021.9.peg.1158 | hypothetical protein                       | hypothetical protein          | unknown                                                     |                       |
| 254781217 | 537021.9.peg.1159 | hypothetical protein                       | hypothetical protein          | phage protein, related to the packing of DNA, recognize DNA |                       |
| 254781218 | 537021.9.peg.1160 | hypothetical protein                       | hypothetical protein          | transcriptional regulator                                   |                       |
| 254781219 | 537021.9.peg.1161 | hypothetical protein                       | hypothetical protein          | unknown                                                     |                       |
| 254781220 | 537021.9.peg.1162 | hypothetical protein                       | hypothetical protein          | unknown                                                     |                       |
| 254781221 | 537021.9.peg.1163 | hypothetical protein                       | hypothetical protein          | unknown                                                     | has signal peptide    |
| 254781222 | 537021.9.peg.1164 | hypothetical protein                       | hypothetical protein          | acyltransferase, phage related                              | 1/2 of the protein    |
| 254781223 | 537021.9.peg.1165 | intrrupted gp229, phage associated protein | hypothetical protein          | acyltransferase, phage related                              | 1/2 of the protein    |
| 254781224 | 537021.9.peg.1166 | hypothetical protein                       | hypothetical protein          | unknown                                                     | transmembrane protein |
| 254781225 | 537021.9.peg.1167 | P4 family phage/plasmid primase            | hypothetical protein          | P4 family phage/plasmid primase                             |                       |
| 254781226 | 537021.9.peg.1168 | hypothetical protein                       | hypothetical protein          | unknown                                                     |                       |
| 254781227 | 537021.9.peg.1169 | hypothetical protein                       | hypothetical protein          | unknown                                                     |                       |
| 254781228 | 537021.9.peg.1170 | hypothetical protein                       | hypothetical protein          | unknown                                                     |                       |
