# Supplementary material for: Predictive Sequence Analysis of the Candidatus Liberibacter asiaticus Proteome
Source: PubMed Central journal article supplement (PMC3399792; doi:10.1371/journal.pone.0041071), 2012-07-18
Supplement: pone.0041071.s002.pdf [file pone.0041071.s002.pdf]

Table S2. Secreted protein candidates and results of manual analysis

| GI        | JUDGMENT                            | N1 | N2 | EVIDENCE                                                                                                                                                                                                               |
|-----------|-------------------------------------|----|----|------------------------------------------------------------------------------------------------------------------------------------------------------------------------------------------------------------------------|
| 254780384 | no SP, extracellular                | 0  | 0  | 1. Type I Secretion System substrate; 2. export by type I secretion system                                                                                                                                             |
| 254780523 | No SP, extracellular                | 0  | 1  | 1. flagellar component; 2. do not have SP export by flagellar assembly machinery                                                                                                                                       |
| 254780685 | No SP, outermembrane                | 0  | 0  | 1. flagellar component; 2. do not have SP export by flagellar assembly machinery                                                                                                                                       |
| 254780380 | No SP, periplasmic                  | 0  | 0  | 1. flagellar component; 2. do not have SP export by flagellar assembly machinery                                                                                                                                       |
| 254780381 | No SP, periplasmic                  | 0  | 0  | 1. flagellar component; 2. do not have SP export by flagellar assembly machinery                                                                                                                                       |
| 254780379 | No SP, periplasmic                  | 0  | 0  | 1. flagellar component; 2. do not have SP export by flagellar assembly machinery                                                                                                                                       |
| 254780378 | No SP, extracellular                | 0  | 1  | 1. flagellar component; 2. do not have SP export by flagellar assembly machinery                                                                                                                                       |
| 254780520 | No SP, extracellular                | 0  | 0  | 1. flagellar component; 2. do not have SP export by flagellar assembly machinery                                                                                                                                       |
| 254780524 | No SP, extracellular                | 0  | 0  | 1. flagellar component; 2. do not have SP export by flagellar assembly machinery                                                                                                                                       |
| 254780531 | No SP, extracellular                | 0  | 0  | 1. flagellar component; 2. do not have SP export by flagellar assembly machinery                                                                                                                                       |
| 254780525 | No SP, extracellular                | 0  | 0  | 1. flagellar component; 2. do not have SP export by flagellar assembly machinery                                                                                                                                       |
| 254780733 | No SP, periplasmic or extracellular | 6  | 0  | 1. flp, pilus assembly protein; 2. has TMH but can be processed by TadV to become periplasmic. Do not have SP                                                                                                          |
| 254780732 | No SP, periplasmic or extracellular | 6  | 0  | 1. flp, pilus assembly protein; 2. has TMH but can be processed by TadV to become periplasmic. Do not have SP                                                                                                          |
| 254780730 | No SP, periplasmic or extracellular | 5  | 1  | 1. flp, pilus assembly protein; 2. has TMH but can be processed by TadV to become periplasmic. Do not have SP                                                                                                          |
| 254780736 | No SP, periplasmic or extracellular | 6  | 0  | 1. flp, pilus assembly protein; 2. has TMH but can be processed by TadV to become periplasmic. Do not have SP                                                                                                          |
| 254780734 | No SP, periplasmic or extracellular | 6  | 0  | 1. flp, pilus assembly protein; 2. has TMH but can be processed by TadV to become periplasmic. Do not have SP                                                                                                          |
| 254781110 | No SP, periplasmic or extracellular | 6  | 0  | 1. TadE or Tad F, pilus assembly protein; 2. has TMH but can be processed by TadV to become periplasmic. Do not have SP                                                                                                |
| 254780934 | No SP, periplasmic or extracellular | 6  | 0  | 1. TadE or Tad F, pilus assembly protein; 2. has TMH but can be processed by TadV to become periplasmic. Do not have SP                                                                                                |
| 254780833 | No SP, periplasmic or extracellular | 6  | 1  | 1. TadE or Tad F, pilus assembly protein; 2. has TMH but can be processed by TadV to become periplasmic. Do not have SP                                                                                                |
| 254780388 | No SP, periplasmic or extracellular | 6  | 0  | 1. TadE or Tad F, pilus assembly protein; 2. has TMH but can be processed by TadV to become periplasmic. Do not have SP                                                                                                |
| 254781108 | No SP, periplasmic or extracellular | 5  | 2  | 1. TadE or Tad F, pilus assembly protein; 2. has TMH but can be processed by TadV to become periplasmic. Do not have SP                                                                                                |
| 255764485 | SP, outermembrane                   | 0  | 0  | 1. CpaD, pilus assembly; 2. orthologs proved by Phobius and one mode of SignalP; 3. start point is wrong, should remove "MMVEYMITILFGGVCFKGLANMRSLSISCLKTIFWKNFFLRTL", then Phobius and one mode of SignalP predict SP |
| 254780707 | SP, extracytoplasmic                | 3  | 1  | 1. Function; 2. ortholog proved by both modes of SignalP and Phobius; 3. COG suggest this protein is usually periplasmic                                                                                               |
| 254780396 | SP, extracytoplasmic                | 6  | 1  | 1. function; 2. ortholog proved by both modes of SignalP and Phobius; 3. pfam suggest this protein contains domain that is usually periplasmic                                                                         |
| 254780698 | SP, extracytoplasmic                | 4  | 1  | 1. function; 2. pfam suggest this protein contains domain that is usually periplasmic; 3. start point wrong, should remove "MLQKKIQSSAKKTFLTYPYGSIYIQRNIQL", then 4 program predict SPs                                |
| 254780930 | SP, extracytoplasmic                | 3  | 1  | 1. function; 2. ortholog proved by both modes of SignalP and Phobius                                                                                                                                                   |
| 254780700 | SP, extracytoplasmic?               | 6  | 1  | 1. ortholog proved by both modes of SignalP and Phobius; 2. COG suggest this protein is usually periplasmic                                                                                                            |
| 254780772 | SP, extracytoplasmic?               | 6  | 1  | 1. function; 2. start point is wrong, should remove "MHKSTEDFRRIRLLEKYFPRSFQ", then phobius will also predict SP                                                                                                       |
| 254781112 | SP, extracytoplasmic?               | 6  | 1  | 1. function; 2. ortholog can be verified by both modes of SignalP and Phobius                                                                                                                                          |
| 254780764 | SP, extracytoplasmic?               | 6  | 1  | 1. function; 2. Ortholog; 3. start point is wrong, should remove "MFTHAEKILYS LDLRKY", then both phibus and signalP predict it as signal protien                                                                       |
| 254781174 | SP, extracytoplasmic?               | 6  | 1  | 1. function; 2. ortholog                                                                                                                                                                                               |
| 254780561 | SP, extracytoplasmic                | 4  | 2  | Function                                                                                                                                                                                                               |
| 254780314 | SP, extracytoplasmic                | 0  | 2  | 1. function; 2. ortholog proved by two modes of SignalP and Phobius                                                                                                                                                    |
| 254780635 | SP, extracytoplasmic                | 0  | 2  | ortholog proved by one mode of SignalP and Phobius                                                                                                                                                                     |
| 254780350 | SP, extracytoplasmic                | 4  | 2  | ortholog proved by one mode of SignalP and Phobius, at least periplasm                                                                                                                                                 |
| 254780953 | SP, extracytoplasmic                | 0  | 2  | 1. function; 2. ortholog proved by one mode of SignalP and Phobius                                                                                                                                                     |
| 254780898 | SP, extracytoplasmic                | 6  | 2  | 1. function; 2. ortholog proved by one mode of SignalP and MEMSAT                                                                                                                                                      |
| 254780395 | SP, extracytoplasmic                | 2  | 2  | 1. function; 2. ortholog proved by two modes of SignalP and Phobius                                                                                                                                                    |
| 254780798 | SP, extracytoplasmic                | 5  | 2  | 1. function; 2. ortholog confirmed by two modes of SignalP                                                                                                                                                             |
| 254780728 | SP, extracytoplasmic                | 5  | 2  | Function                                                                                                                                                                                                               |
| 254780592 | SP, extracytoplasmic                | 4  | 2  | Function                                                                                                                                                                                                               |
| 254780376 | SP, extracytoplasmic                | 2  | 2  | 1. function, although it is Flagellar assembly protein, but this one is probably transported by Sec into periplasm to set up the flagellar machinery, it is FlgI, and it is                                            |

|           |                       |   |   |                                                                                                                                                     |
|-----------|-----------------------|---|---|-----------------------------------------------------------------------------------------------------------------------------------------------------|
|           |                       |   |   | an exception; 2. ortholog, confirmed by two modes of signalP too                                                                                    |
| 254780477 | SP, extracytoplasmic  | 5 | 2 | ortholog proved by one mode of SignalP and Phobius                                                                                                  |
| 254780745 | SP, extracytoplasmic  | 3 | 2 | 1. function; 2. pfam suggest this protein contains domain that is usually periplasmic                                                               |
| 254781221 | SP, extracytoplasmic  | 0 | 2 | ortholog predicted to have SP                                                                                                                       |
| 254781045 | SP, extracytoplasmic  | 0 | 2 | 1. function; 2. ortholog, confirmed by two modes of signalP and phobius too                                                                         |
| 254780221 | SP, extracytoplasmic  | 0 | 3 |                                                                                                                                                     |
| 254780528 | SP, extracytoplasmic  | 0 | 3 | Function                                                                                                                                            |
| 254780959 | SP, extracytoplasmic  | 5 | 3 |                                                                                                                                                     |
| 254780954 | SP, extracytoplasmic  | 5 | 3 |                                                                                                                                                     |
| 254781078 | SP, extracytoplasmic  | 4 | 3 |                                                                                                                                                     |
| 254780556 | SP, extracytoplasmic  | 2 | 3 |                                                                                                                                                     |
| 254780906 | SP, extracytoplasmic  | 0 | 3 |                                                                                                                                                     |
| 254780737 | SP, extracytoplasmic  | 0 | 3 |                                                                                                                                                     |
| 254780735 | SP, extracytoplasmic  | 4 | 3 | a bit weird, as it is flp homolog                                                                                                                   |
| 254780281 | SP, extracytoplasmic  | 5 | 3 | Ortholog                                                                                                                                            |
| 254780342 | SP, extracytoplasmic  | 2 | 3 | Function                                                                                                                                            |
| 254780984 | SP, extracytoplasmic  | 0 | 3 | Close homolog is 254780981, which is predicted to have SP by 2 methods out of 4                                                                     |
| 254780935 | SP, extracytoplasmic  | 4 | 3 | Function                                                                                                                                            |
| 254780547 | SP, extracytoplasmic  | 2 | 3 | Function                                                                                                                                            |
| 254781014 | SP, extracytoplasmic  | 4 | 3 |                                                                                                                                                     |
| 254781128 | SP, extracytoplasmic  | 3 | 3 |                                                                                                                                                     |
| 254780759 | SP, extracytoplasmic  | 0 | 3 |                                                                                                                                                     |
| 254781010 | SP, extracytoplasmic  | 0 | 3 |                                                                                                                                                     |
| 254780377 | SP, extracytoplasmic  | 3 | 3 | function, although it is Flagellar assembly protein, but this one is probably transported by Sec into periplasm, it is FlgA, and it is an exception |
| 254780375 | SP, extracytoplasmic  | 0 | 3 |                                                                                                                                                     |
| 254780374 | SP, extracytoplasmic  | 2 | 3 | function, although it is Flagellar assembly protein, but this one is probably transported by Sec into periplasm, it is FlgH, and it is an exception |
| 254780717 | SP, extracytoplasmic  | 4 | 3 | function                                                                                                                                            |
| 254780435 | SP, extracytoplasmic  | 3 | 3 | function                                                                                                                                            |
| 254780965 | SP, extracytoplasmic  | 5 | 3 |                                                                                                                                                     |
| 254780747 | SP, extracytoplasmic  | 6 | 3 | 1. Function; 2. structure prediction, the TMH predicted in the middle of the protein is not true judging from the structure template                |
| 254780207 | SP, extracytoplasmic  | 0 | 3 |                                                                                                                                                     |
| 254780141 | SP, extracytoplasmic  | 3 | 3 | function                                                                                                                                            |
| 254780589 | SP, extracytoplasmic  | 2 | 3 |                                                                                                                                                     |
| 254780563 | SP, extracytoplasmic  | 0 | 4 | function                                                                                                                                            |
| 254780951 | SP, extracytoplasmic  | 3 | 4 |                                                                                                                                                     |
| 254780170 | SP, extracytoplasmic  | 4 | 4 | function                                                                                                                                            |
| 254780308 | SP, extracytoplasmic  | 4 | 4 | function                                                                                                                                            |
| 254780907 | SP, extracytoplasmic  | 0 | 4 |                                                                                                                                                     |
| 254780909 | SP, extracytoplasmic  | 0 | 4 |                                                                                                                                                     |
| 254781156 | SP, extracytoplasmic  | 0 | 4 |                                                                                                                                                     |
| 254781157 | SP, extracytoplasmic  | 0 | 4 |                                                                                                                                                     |
| 254780607 | SP, extracytoplasmic  | 0 | 4 |                                                                                                                                                     |
| 254780199 | SP, extracytoplasmic  | 5 | 4 | function                                                                                                                                            |
| 254781207 | SP, extracytoplasmic  | 5 | 4 | ortholog                                                                                                                                            |
| 254780542 | SP, extracytoplasmic  | 0 | 4 |                                                                                                                                                     |
| 254780548 | SP, extracytoplasmic  | 5 | 4 | function                                                                                                                                            |
| 254781121 | SP, extracytoplasmic  | 0 | 4 |                                                                                                                                                     |
| 254780209 | SP, extracytoplasmic  | 3 | 4 |                                                                                                                                                     |
| 254780727 | SP, extracytoplasmic  | 3 | 4 | function                                                                                                                                            |
| 254780598 | SP, extracytoplasmic  | 0 | 4 | function                                                                                                                                            |
| 254780844 | SP, extracytoplasmic  | 4 | 4 |                                                                                                                                                     |
| 254780537 | SP, extracytoplasmic  | 2 | 4 | function                                                                                                                                            |
| 254781003 | SP, extracytoplasmic  | 3 | 4 |                                                                                                                                                     |
| 254780443 | SP, extracytoplasmic  | 4 | 4 |                                                                                                                                                     |
| 254780981 | SP, extracytoplasmic  | 1 | 2 | Close homolog is 254780984, which is predicted to have SP by 3 methods out of 4                                                                     |
| 254780220 | SP, extracytoplasmic  | 0 | 2 |                                                                                                                                                     |
| 255764500 | SP, extracytoplasmic  | 2 | 2 |                                                                                                                                                     |
| 254781159 | SP, extracytoplasmic  | 0 | 2 |                                                                                                                                                     |
| 254781005 | SP, extracytoplasmic  | 0 | 2 |                                                                                                                                                     |
| 254780886 | SP, extracytoplasmic  | 3 | 2 |                                                                                                                                                     |
| 254780963 | SP, extracytoplasmic  | 3 | 2 |                                                                                                                                                     |
| 254780914 | SP, extracytoplasmic? | 6 | 2 |                                                                                                                                                     |
| 254780135 | SP, extracytoplasmic? | 6 | 2 |                                                                                                                                                     |

|           |                                   |   |   |                                                                                                                                 |
|-----------|-----------------------------------|---|---|---------------------------------------------------------------------------------------------------------------------------------|
| 254780929 | SP, extracytoplasmic?             | 6 | 2 |                                                                                                                                 |
| 254781007 | SP, extracytoplasmic?             | 6 | 2 |                                                                                                                                 |
| 254780980 | SP, extracytoplasmic              | 0 | 1 | close homolog is 254780556, which is predicted to have SP by 3 out of 4 methods                                                 |
| 254780311 | cytoplasmic                       | 0 | 1 | 1. function as cytoplasmic enzyme; 2. structure prediction                                                                      |
| 254780313 | cytoplasmic                       | 0 | 1 | 1. function, work with ribosome; 2. structure prediction                                                                        |
| 254780315 | cytoplasmic                       | 0 | 1 |                                                                                                                                 |
| 254781149 | cytoplasmic                       | 0 | 1 | Function                                                                                                                        |
| 254781058 | cytoplasmic                       | 0 | 1 | 1. function, this is the C-terminal part of phage lysozyme; 2. structure prediction                                             |
| 254781197 | cytoplasmic                       | 0 | 1 | Function                                                                                                                        |
| 254781071 | cytoplasmic                       | 0 | 1 | 1. this is just the middle piece of a protein; 2. structure prediction                                                          |
| 254780392 | cytoplasmic                       | 0 | 1 | 1. Function; 2. structure prediction                                                                                            |
| 254780482 | cytoplasmic                       | 0 | 1 | 1. function; 2. structure prediction                                                                                            |
| 255764495 | cytoplasmic                       | 0 | 1 | ortholog cannot be verified by either mode of signalP or Phobius                                                                |
| 255764462 | cytoplasmic                       | 0 | 1 | function                                                                                                                        |
| 254780908 | cytoplasmic                       | 0 | 1 |                                                                                                                                 |
| 254780918 | cytoplasmic                       | 0 | 1 |                                                                                                                                 |
| 254780912 | cytoplasmic                       | 0 | 1 |                                                                                                                                 |
| 254781026 | cytoplasmic                       | 0 | 1 | 1. function; 2. this is the middle part of a big protein; 3. structure prediction                                               |
| 254780195 | cytoplasmic                       | 2 | 1 | 1. function; 2. structure prediction                                                                                            |
| 254780942 | cytoplasmic                       | 0 | 1 | function                                                                                                                        |
| 254781205 | cytoplasmic                       | 0 | 1 |                                                                                                                                 |
| 254781162 | cytoplasmic                       | 0 | 1 | function                                                                                                                        |
| 254780168 | cytoplasmic                       | 0 | 1 | 1. function; 2. structure prediction;<br>3. ortholog proved by one mode of SignalP and Phobius                                  |
| 254780164 | cytoplasmic                       | 0 | 1 | Function                                                                                                                        |
| 254780768 | cytoplasmic                       | 0 | 1 | 1. Ortholog; 2. pfam                                                                                                            |
| 254780640 | cytoplasmic                       | 0 | 1 | Function                                                                                                                        |
| 254780543 | cytoplasmic                       | 0 | 1 | Function                                                                                                                        |
| 254780227 | cytoplasmic                       | 3 | 1 | function as metabolic enzyme                                                                                                    |
| 254780724 | cytoplasmic                       | 0 | 1 | Function                                                                                                                        |
| 254780470 | cytoplasmic                       | 0 | 1 | 1. function; 2. structure prediction                                                                                            |
| 254780920 | cytoplasmic                       | 2 | 1 | Function                                                                                                                        |
| peg_1087  | cytoplasmic                       | 0 | 1 |                                                                                                                                 |
| 254780132 | cytoplasmic                       | 0 | 1 | Function                                                                                                                        |
| 254780156 | cytoplasmic                       | 0 | 1 | Function                                                                                                                        |
| 254781097 | cytoplasmic                       | 5 | 1 | 1. structure prediction; 2. tiger say this step occur in cytoplasm                                                              |
| 254780154 | cytoplasmic                       | 0 | 1 |                                                                                                                                 |
| 254781099 | cytoplasmic                       | 0 | 1 | 1. structure prediction; 2. ortholog can only be verified by Phobius;<br>3. PRK says this step is cytoplasmic                   |
| 254780787 | cytoplasmic                       | 0 | 1 | function, translation initiation factor IF-2                                                                                    |
| 254781036 | cytoplasmic                       | 0 | 1 | 1. function; 2. pfam                                                                                                            |
| 254781031 | cytoplasmic                       | 2 | 1 | 1. Function; 2. structure prediction                                                                                            |
| 254780439 | cytoplasmic                       | 2 | 1 | 1. function; 2. pfam                                                                                                            |
| 254780434 | cytoplasmic                       | 0 | 1 | 1. function; 2. pfam                                                                                                            |
| peg_473   | cytoplasmic                       | 0 | 1 | function                                                                                                                        |
| 254780322 | cytoplasmic                       | 0 | 1 | 1. function; 2. structure prediction                                                                                            |
| 254780742 | cytoplasmic                       | 0 | 1 | 1. function; 2. pfam                                                                                                            |
| 254780219 | cytoplasmic                       | 0 | 1 |                                                                                                                                 |
| 254780261 | cytoplasmic                       | 0 | 1 | function, ribosome protein                                                                                                      |
| 254780266 | cytoplasmic                       | 0 | 1 | function, ribosome protein                                                                                                      |
| 254780361 | cytoplasmic                       | 0 | 1 | function, ribosome protein                                                                                                      |
| 254780687 | cytoplasmic                       | 0 | 1 | Function, flagellar cytoplasmic component                                                                                       |
| 254780682 | cytoplasmic?                      | 0 | 1 |                                                                                                                                 |
| 254780510 | cytoplasmic?                      | 0 | 1 |                                                                                                                                 |
| 254781039 | cytoplasmic                       | 3 | 2 | function as metabolic enzyme                                                                                                    |
| peg_887   | cytoplasmic                       | 0 | 2 | function in tRNA processing                                                                                                     |
| 254781015 | cytoplasmic                       | 0 | 2 | this does not look like a complete protein, ortholog is a Multi-TMHs protein, but this one lost most of the transmembrane part. |
| peg_1064  | cytoplasmic                       | 0 | 2 | ortholog not predicted to have SP by both modes of SignalP and Phobius                                                          |
| 254781048 | cytoplasmic                       | 3 | 2 | function in TCA cycle                                                                                                           |
| 254780319 | cytoplasmic                       | 0 | 3 | function, ribosome protein                                                                                                      |
| 255764476 | transmembrane, SP not likely real | 6 | 1 | 1. function; 2. multi-TMHs                                                                                                      |
| 255764499 | transmembrane                     | 6 | 1 | 1. Single-TMH, major part cytoplasmic<br>2. ortholog cannot be verified by either mode of signalP or phobius                    |
| 254780140 | Transmembrane, SP not likely true | 6 | 1 | 1. single-TMH, major part periplasmic<br>2. ortholog can be proved by only one mode of signalp                                  |

|           |                                       |   |   |                                                                                                                                                                                                  |
|-----------|---------------------------------------|---|---|--------------------------------------------------------------------------------------------------------------------------------------------------------------------------------------------------|
| 254780519 | transmembrane, SP not likely real     | 6 | 1 | 1. Function, flagellar transmembrane component; 2. multi-TMHs                                                                                                                                    |
| 254780695 | transmembrane, SP not likely real     | 6 | 1 | 1. Function, flagellar transmembrane component; 2. double-TMH                                                                                                                                    |
| 255764488 | transmembrane, SP not likely real     | 6 | 1 | 1. Function, flagellar transmembrane component; 2. double-TMH                                                                                                                                    |
| 254780507 | transmembrane, SP not likely true     | 6 | 1 | 1. Function, flagellar transmembrane component;<br>2. Single-TMH, major part cytoplasmic                                                                                                         |
| 254780545 | transmembrane, but SP not likely real | 6 | 1 | Single-TMH, major part cytoplasmic                                                                                                                                                               |
| 254780752 | transmembrane, SP not likely real     | 6 | 1 | 1. single-TMH, major part periplasmic; 2. ortholog                                                                                                                                               |
| 254780577 | transmembrane, SP not likely real     | 6 | 1 | 1. function; 2. single-TMH, major part periplasmic                                                                                                                                               |
| 254780623 | transmembrane, SP not likely real     | 6 | 1 | 1. Single-TMH at C-terminal, major part periplasmic; 2. ortholog                                                                                                                                 |
| 254780436 | transmembrane, SP not likely real     | 4 | 1 | single-TMH, major part periplasmic                                                                                                                                                               |
| 254780961 | transmembrane, SP not likely real?    | 6 | 1 | 1. single-TMH, major part periplasmic; 2. ortholog do not have SP by neither mode of SignalP or Phobius; 3. start point is wrong, should add "MSFNVRNFVLWI" in front, and it has one SP, one TMH |
| 255764508 | transmembrane, SP might be right      | 6 | 1 | double-TMH                                                                                                                                                                                       |
| 254780367 | transmembrane, SP not likely real     | 6 | 1 | multi-TMHs                                                                                                                                                                                       |
| 254780866 | transmembrane, SP not likely real     | 6 | 1 | multi-TMHs                                                                                                                                                                                       |
| 254780568 | transmembrane, SP not likely real     | 6 | 1 | multi-TMHs                                                                                                                                                                                       |
| 255764466 | transmembrane, SP not likely real     | 6 | 1 | multi-TMHs                                                                                                                                                                                       |
| 254780402 | transmembrane, SP not likely real     | 6 | 1 | double-TMH                                                                                                                                                                                       |
| 254780228 | transmembrane, SP not likely real     | 6 | 1 | 1. double-TMHs; 2. start wrong, should add "MMLILFI", then it has double TMHs                                                                                                                    |
| 254780852 | transmembrane, SP not likely real     | 6 | 1 | multi-TMHs                                                                                                                                                                                       |
| 254780917 | transmembrane, SP not likely real     | 6 | 1 | 1. function; 2. multi-TMHs                                                                                                                                                                       |
| 254780708 | transmembrane, SP not likely real     | 6 | 1 | multi-TMHs                                                                                                                                                                                       |
| 254780705 | transmembrane, SP not likely real     | 6 | 1 | 1. function; 2. multi-TMHs                                                                                                                                                                       |
| 254781033 | transmembrane, SP not likely real     | 6 | 1 | multi-TMHs                                                                                                                                                                                       |
| 254780450 | transmembrane, SP not likely real     | 3 | 1 | double-TMH                                                                                                                                                                                       |
| 254780774 | transmembrane, SP not likely real     | 6 | 1 | multi-TMHs                                                                                                                                                                                       |
| 254781079 | transmembrane, SP not likely real     | 5 | 1 | multi-TMHs                                                                                                                                                                                       |
| 254780793 | transmembrane, SP not likely real     | 6 | 1 | multi-TMHs                                                                                                                                                                                       |
| 254780171 | transmembrane, SP not likely real     | 6 | 1 | 1. function; 2. multi-TMHs                                                                                                                                                                       |
| 254780483 | transmembrane, SP not likely real     | 6 | 1 | 1. function; 2. multi-TMHs                                                                                                                                                                       |
| 255764497 | transmembrane, SP not likely real     | 6 | 1 | multi-TMHs                                                                                                                                                                                       |
| 255764468 | transmembrane, SP not likely real     | 6 | 1 | 1. multi-TMHs; 2. start point is wrong, should add "MSRKVRKFDTVFPFTNYI RYSIISLPVVFLGVVCCLLAILIIFKDSLNSISFGLFG" in front                                                                          |
| 254780860 | transmembrane, SP not likely real     | 6 | 1 | multi-TMHs                                                                                                                                                                                       |
| 255764512 | transmembrane, SP not likely real     | 6 | 1 | 1. Single-TMH, major part cytoplasmic<br>2. ortholog cannot be verified by either mode of signalP or phobius                                                                                     |
| 254781169 | transmembrane, SP not likely real     | 6 | 1 | multi-TMHs                                                                                                                                                                                       |
| 254780799 | transmembrane, SP not likely real     | 6 | 1 | multi-TMHs                                                                                                                                                                                       |
| 254780425 | transmembrane, SP not likely real     | 6 | 1 | Multi-TMHs                                                                                                                                                                                       |
| 254780494 | transmembrane, SP not likely real     | 6 | 1 | 1. function; 2. Multi-TMHs                                                                                                                                                                       |
| 254780335 | transmembrane, SP not likely real     | 6 | 1 | Multi-TMHs                                                                                                                                                                                       |
| 254780721 | transmembrane, SP not likely real     | 6 | 1 | Multi-TMHs                                                                                                                                                                                       |
| 254780298 | transmembrane, SP not likely real     | 6 | 1 | 1. function; 2. Multi-TMHs                                                                                                                                                                       |
| 254780291 | transmembrane, SP not likely real     | 6 | 1 | 1. Single-TMH, major part periplasmic<br>2. ortholog predicted to have SP by only one mode of SignalP                                                                                            |
| 254780593 | transmembrane, SP not likely real     | 6 | 1 | Multi-TMHs                                                                                                                                                                                       |
| 254780576 | transmembrane, SP not likely real     | 6 | 1 | 1. function; 2. Multi-TMHs                                                                                                                                                                       |
| 254780841 | transmembrane, SP not likely real     | 6 | 1 | Multi-TMHs                                                                                                                                                                                       |
| 254780924 | transmembrane, SP not likely real     | 6 | 1 | Multi-TMHs                                                                                                                                                                                       |
| 254780925 | transmembrane, SP not likely real     | 6 | 1 | 1. function; 2. Multi-TMHs                                                                                                                                                                       |
| 254781178 | transmembrane, SP not likely real     | 6 | 1 | 1. Multi-TMHs; 2. Ortholog                                                                                                                                                                       |
| 254780719 | transmembrane, SP not likely real     | 6 | 1 | 1. function; 2. Multi-TMHs                                                                                                                                                                       |
| 254781002 | transmembrane, SP not likely real     | 6 | 1 | Multi-TMHs                                                                                                                                                                                       |
| 254780323 | transmembrane, SP not likely real     | 5 | 1 | 1. function; 2. multi-TMHs                                                                                                                                                                       |
| 254780967 | transmembrane, SP not likely real     | 6 | 1 | Multi-TMHs                                                                                                                                                                                       |
| 254780815 | transmembrane, SP not likely real     | 5 | 1 | 1. Single-TMH, major part cytoplasmic; 2. Pfam;<br>3. ortholog predicted to have SP only by Phobius                                                                                              |
| 254780749 | transmembrane, SP not likely real     | 6 | 1 | Multi-TMHs                                                                                                                                                                                       |
| 254781189 | transmembrane, SP not likely real     | 6 | 1 | Multi-TMHs                                                                                                                                                                                       |
| 254781042 | transmembrane, SP not likely real     | 6 | 1 | Multi-TMHs                                                                                                                                                                                       |
| 254780558 | transmembrane, SP not likely real     | 6 | 1 | 1. function; 2. Pfam; 3. single TMH at N-terminus and mainly periplasmic,                                                                                                                        |
| 254781158 | transmembrane, SP not likely real     | 6 | 1 | 1. single TMH at N-terminus and mainly periplasmic;<br>2. ortholog has SP by Phobius and one mode of SignalP                                                                                     |
| 254780421 | transmembrane, SP not likely real     | 6 | 1 | single TMH at N-terminus and mainly periplasmic,                                                                                                                                                 |
| 254780386 | transmembrane, SP not likely real     | 5 | 1 | single TMH at N-terminus and mainly periplasmic,                                                                                                                                                 |

|           |                                        |   |   |                                                                                                 |
|-----------|----------------------------------------|---|---|-------------------------------------------------------------------------------------------------|
| 254780572 | transmembrane, SP not likely real      | 6 | 1 | 1. Function, pilus transmembrane component; 2. single-TMH, major part periplasmic               |
| 254780679 | transmembrane, SP not likely real      | 6 | 2 | might be single transmembrane protein, and the C-terminal is cytoplasmic                        |
| 254780671 | transmembrane, SP not likely real      | 6 | 2 | 1. function; 2. might be single-TMH after cleaving SP, major part is cytoplasmic                |
| 254780532 | transmembrane, SP not likely real      | 5 | 2 | 1. single-TMH, major part periplasmic;<br>2. ortholog can be proved by only one mode of signalp |
| peg_237   | transmembrane, SP not likely real      | 6 | 2 | single-TMH in the middle                                                                        |
| peg_789   | transmembrane, SP not likely real      | 6 | 2 | multi-TMHs                                                                                      |
| 254781098 | transmembrane, SP not likely real      | 6 | 2 | Multi-TMHs                                                                                      |
| 254780896 | transmembrane, but SP is probably real | 6 | 2 | 1. function; 2. multi-TMHs                                                                      |
| 254780372 | transmembrane, but SP is probably real | 6 | 3 | 1. function, flagellar transmembrane component; 2. Multi-TMHs                                   |
| 254780729 | transmembrane, but SP might be true    | 6 | 3 | 1. function; 2. Multi-TMHs                                                                      |
| 254780196 | transmembrane, but SP might be true    | 6 | 3 | 1. function; 2. after cleavage of SP, single-TMH, major cytoplasmic                             |
| 254780468 | transmembrane, but SP is probably real | 6 | 4 | Multi-TMHs                                                                                      |

N1: number of methods (out of 6) that predict the protein to have transmembrane helix (helices)

N2: number of methods (out of 4) that predict the protein to have a signal peptide

SP: signal peptide

TMH: transmembrane helix

Cell color:

Yellow: extracytoplasmic proteins that are without signal peptides and that are secreted in Sec-independent pathways;

Light green: proteins with signal peptides and they are likely function in the extracytoplasmic space;

Pink: cytoplasmic proteins

Light blue: transmembrane proteins that are located in the inner membrane of this Gram-negative bacterium.
