# Supplementary material for: Predictive Sequence Analysis of the Candidatus Liberibacter asiaticus Proteome
Source: PubMed Central journal article supplement (PMC3399792; doi:10.1371/journal.pone.0041071), 2012-07-18
Supplement: pone.0041071.s003.pdf [file pone.0041071.s003.pdf]

Table S3. Transmembrane protein candidates and results of manual analysis

| GI        | Prediction    | N | Evidence                                                                                         |
|-----------|---------------|---|--------------------------------------------------------------------------------------------------|
| 254780811 | transmembrane | 6 | 1. cog; 2. multi-TMHs                                                                            |
| 254780551 | transmembrane | 6 | 1. funciton; 2. multi-TMHs                                                                       |
| 254780539 | transmembrane | 6 | 1. funciton; 2. multi-TMHs; 3. structure prediction                                              |
| 254780843 | transmembrane | 6 | 1. funciton; 2. multi-TMHs; 3. structure prediction                                              |
| 254780864 | transmembrane | 6 | 1. funciton; 2. double-TMHs                                                                      |
| 254780867 | transmembrane | 6 | 1. funciton; 2. multi-TMHs                                                                       |
| 254780903 | transmembrane | 6 | 1. funciton; 2. double-TMHs                                                                      |
| 254781029 | transmembrane | 6 | 1. funciton; 2. double-TMHs                                                                      |
| 254781103 | transmembrane | 6 | 1. funciton;<br>2. single-TMH close to N-terminus major part periplasmic                         |
| 254781184 | transmembrane | 6 | 1. funciton;<br>2. single-TMH close to N-terminus major part cytoplasmic                         |
| 254780690 | transmembrane | 6 | function                                                                                         |
| 254780512 | transmembrane | 6 | function                                                                                         |
| 254780138 | transmembrane | 6 | 1. funciton; 2. multi-TMHs; 3. structure prediction                                              |
| 254780149 | transmembrane | 6 | 1. funciton; 2. structure prediction; 3. single-TMH in the middle                                |
| 254780172 | transmembrane | 6 | 1. funciton; 2. multi-TMHs; 3. structure prediction                                              |
| 254780193 | transmembrane | 6 | 1. funciton; 2. multi-TMHs; 3. structure prediction                                              |
| 254780205 | transmembrane | 6 | 1. funciton; 2. multi-TMHs                                                                       |
| 254780223 | transmembrane | 6 | 1. funciton; 2. multi-TMHs; 3. structure prediction                                              |
| 254780230 | transmembrane | 6 | 1. funciton; 2. double-TMHs                                                                      |
| 254780241 | transmembrane | 6 | 1. funciton; 2. multi-TMHs; 3. structure prediction                                              |
| 254780302 | transmembrane | 6 | 1. funciton; 2. multi-TMHs                                                                       |
| 254780341 | transmembrane | 6 | 1. funciton; 2. multi-TMHs; 3. structure prediction                                              |
| 254780360 | transmembrane | 6 | 1. funciton; 2. multi-TMHs                                                                       |
| 255764465 | transmembrane | 6 | 1. funciton; 2. multi-TMHs; 3. structure prediction                                              |
| 254780373 | transmembrane | 6 | 1. function;<br>2. single-TMH close to N-terminus major part periplasmic                         |
| 255764467 | transmembrane | 6 | 1. funciton; 2. multi-TMHs; 3. structure prediction                                              |
| 254780387 | transmembrane | 6 | 1. funciton; 2. multi-TMHs; 3. structure prediction                                              |
| 255764469 | transmembrane | 6 | 1. funciton; 2. multi-TMHs                                                                       |
| 254780411 | transmembrane | 6 | 1. funciton; 2. multi-TMHs                                                                       |
| 255764470 | transmembrane | 6 | 1. funciton; 2. multi-TMHs                                                                       |
| 254780452 | transmembrane | 6 | 1. funciton; 2. multi-TMHs                                                                       |
| 254780463 | transmembrane | 6 | 1. function; 2. single-TMH at C-terminus major part cytoplasmic                                  |
| 254780471 | transmembrane | 6 | 1. funciton; 2. multi-TMHs                                                                       |
| 254780472 | transmembrane | 6 | 1. funciton; 2. multi-TMHs; 3. structure prediction                                              |
| 254780473 | transmembrane | 6 | 1. funciton; 2. multi-TMHs; 3. structure prediction                                              |
| 254780773 | transmembrane | 6 | 1. funciton; 2. multi-TMHs                                                                       |
| 254780746 | transmembrane | 6 | 1. function;<br>2. single-TMH close to N-terminus major part periplasmic                         |
| 254780722 | transmembrane | 6 | 1. function; 2. double-TM                                                                        |
| 255764486 | transmembrane | 6 | 1. funciton; 2. multi-TMHs; 3. structure prediction                                              |
| 254780701 | transmembrane | 6 | 1. funciton; 2. multi-TMHs; 3. structure prediction                                              |
| 255764501 | transmembrane | 6 | 1. funciton; 2. multi-TMHs; 3. structure prediction                                              |
| 254780549 | transmembrane | 6 | 1. function; 2. pfam and tiger suggests this is single TM protein leaving major part periplasmic |
| 254780540 | transmembrane | 6 | 1. funciton; 2. multi-TMHs; 3. structure prediction                                              |
| 254780832 | transmembrane | 6 | 1. funciton; 2. multi-TMHs; 3. structure prediction                                              |
| 254780862 | transmembrane | 6 | 1. funciton; 2. multi-TMHs                                                                       |
| 254780865 | transmembrane | 6 | 1. funciton; 2. multi-TMHs                                                                       |
| 254780939 | transmembrane | 6 | 1. function;                                                                                     |

|           |               |   |                                                                                                   |
|-----------|---------------|---|---------------------------------------------------------------------------------------------------|
|           |               |   | 2. single-TMH close to N-terminus major part periplasmic                                          |
| 254780982 | transmembrane | 6 | 1. funciton; 2. multi-TMHs                                                                        |
| 254780993 | transmembrane | 6 | 1. funciton; 2. multi-TMHs                                                                        |
| 254781041 | transmembrane | 6 | 1. funciton; 2. multi-TMHs; 3. structure prediction                                               |
| 254781085 | transmembrane | 6 | 1. funciton; 2. structure prediction;<br>3. single-TMH close to N-terminus major part cytoplasmic |
| 254781086 | transmembrane | 6 | 1. funciton; 2. structure prediction;<br>3. single-TMH close to N-terminus major part cytoplasmic |
| 254781087 | transmembrane | 6 | 1. funciton; 2. double-TM; 3. structure prediction                                                |
| 254781088 | transmembrane | 6 | 1. funciton; 2. multi-TMHs; 3. structure prediction                                               |
| 254781100 | transmembrane | 6 | 1. funciton; 2. multi-TMHs                                                                        |
| 254781113 | transmembrane | 6 | 1. funciton; 2. multi-TMHs; 3. structure prediction                                               |
| 254781171 | transmembrane | 6 | 1. funciton; 2. multi-TMHs                                                                        |
| 254780343 | transmembrane | 6 | 1. funciton; 2. multi-TMHs; 3. structure prediction                                               |
| 254780697 | transmembrane | 6 | 1. function; 2. double-TM                                                                         |
| 254780571 | transmembrane | 6 | 1. function TadG is membrane protein;<br>2. single-TMH close to N-terminus major part periplasmic |
| 254780803 | transmembrane | 6 | 1. pfam; 2. cog;<br>3. single-TMH close to N-terminus major part periplasmic                      |
| 254780695 | transmembrane | 6 |                                                                                                   |
| 255764488 | transmembrane | 6 |                                                                                                   |
| 255764508 | transmembrane | 6 |                                                                                                   |
| 254780402 | transmembrane | 6 |                                                                                                   |
| 254780372 | transmembrane | 6 |                                                                                                   |
| 254780519 | transmembrane | 6 |                                                                                                   |
| 254780511 | transmembrane | 6 |                                                                                                   |
| 254780468 | transmembrane | 6 |                                                                                                   |
| 254780729 | transmembrane | 6 |                                                                                                   |
| peg_789   | transmembrane | 6 |                                                                                                   |
| 254781098 | transmembrane | 6 |                                                                                                   |
| 254780896 | transmembrane | 6 |                                                                                                   |
| 254780171 | transmembrane | 6 |                                                                                                   |
| 254780228 | transmembrane | 6 |                                                                                                   |
| 254780298 | transmembrane | 6 |                                                                                                   |
| 254780335 | transmembrane | 6 |                                                                                                   |
| 254780367 | transmembrane | 6 |                                                                                                   |
| 254780425 | transmembrane | 6 |                                                                                                   |
| 254780483 | transmembrane | 6 |                                                                                                   |
| 254780494 | transmembrane | 6 |                                                                                                   |
| 254780793 | transmembrane | 6 |                                                                                                   |
| 254780799 | transmembrane | 6 |                                                                                                   |
| 254780841 | transmembrane | 6 |                                                                                                   |
| 254780852 | transmembrane | 6 |                                                                                                   |
| 254780860 | transmembrane | 6 |                                                                                                   |
| 254780866 | transmembrane | 6 |                                                                                                   |
| 254780917 | transmembrane | 6 |                                                                                                   |
| 254780924 | transmembrane | 6 |                                                                                                   |
| 254780925 | transmembrane | 6 |                                                                                                   |
| 254780967 | transmembrane | 6 |                                                                                                   |
| 254781002 | transmembrane | 6 |                                                                                                   |
| 254781033 | transmembrane | 6 |                                                                                                   |
| 254781042 | transmembrane | 6 |                                                                                                   |
| 254781169 | transmembrane | 6 |                                                                                                   |
| 254781178 | transmembrane | 6 |                                                                                                   |

|           |               |   |                                                       |
|-----------|---------------|---|-------------------------------------------------------|
| 254781189 | transmembrane | 6 |                                                       |
| 255764466 | transmembrane | 6 |                                                       |
| 255764468 | transmembrane | 6 |                                                       |
| 255764497 | transmembrane | 6 |                                                       |
| 254780568 | transmembrane | 6 |                                                       |
| 254780576 | transmembrane | 6 |                                                       |
| 254780593 | transmembrane | 6 |                                                       |
| 254780705 | transmembrane | 6 |                                                       |
| 254780708 | transmembrane | 6 |                                                       |
| 254780719 | transmembrane | 6 |                                                       |
| 254780721 | transmembrane | 6 |                                                       |
| 254780749 | transmembrane | 6 |                                                       |
| 254780774 | transmembrane | 6 |                                                       |
| 255764476 | transmembrane | 6 |                                                       |
| peg_237   | transmembrane | 6 |                                                       |
| 254780623 | transmembrane | 6 |                                                       |
| 254780572 | transmembrane | 6 |                                                       |
| 254780529 | transmembrane | 6 |                                                       |
| 254780752 | transmembrane | 6 |                                                       |
| 254781158 | transmembrane | 6 |                                                       |
| 254780577 | transmembrane | 6 |                                                       |
| 254780421 | transmembrane | 6 |                                                       |
| 254780558 | transmembrane | 6 |                                                       |
| 254780291 | transmembrane | 6 |                                                       |
| 254780140 | transmembrane | 6 |                                                       |
| 254780961 | transmembrane | 6 |                                                       |
| 255764499 | transmembrane | 6 |                                                       |
| 254780507 | transmembrane | 6 |                                                       |
| 254780545 | transmembrane | 6 |                                                       |
| 255764512 | transmembrane | 6 |                                                       |
| 254780196 | transmembrane | 6 |                                                       |
| 254780671 | transmembrane | 6 |                                                       |
| 254780679 | transmembrane | 6 |                                                       |
| 254780159 | transmembrane | 6 | double-TM                                             |
| 254780179 | transmembrane | 6 | single-TMH at C-terminus major part cytoplasmic       |
| 254780198 | transmembrane | 6 | double-TM                                             |
| 254780204 | transmembrane | 6 | multi-TMHs                                            |
| 254780235 | transmembrane | 6 | single-TMH at C-terminus major part cytoplasmic       |
| 254780284 | transmembrane | 6 | single-TMH in the middle                              |
| 254780324 | transmembrane | 6 | single-TMH in the middle                              |
| 254780354 | transmembrane | 6 | single-TMH in the middle                              |
| 254780790 | transmembrane | 6 | 1. structure prediction; 2. multi-TMHs                |
| peg_476   | transmembrane | 6 | 1. structure prediction; 2. multi-TMHs                |
| peg_477   | transmembrane | 6 | 1. structure prediction; 2. multi-TMHs                |
| 254780612 | transmembrane | 6 | double-TM                                             |
| 254780600 | transmembrane | 6 | multi-TMHs                                            |
| 254780579 | transmembrane | 6 | single-TMH close to N-terminus major part cytoplasmic |
| 254780578 | transmembrane | 6 | multi-TMHs                                            |
| 254780575 | transmembrane | 6 | 1. structure prediction; 2. multi-TMHs                |
| 255764502 | transmembrane | 6 | single-TMH in the middle                              |
| 255764503 | transmembrane | 6 | single-TMH in the middle                              |
| 254780863 | transmembrane | 6 | single-TMH in the middle                              |
| 254780878 | transmembrane | 6 | single-TMH in the middle                              |

|           |                              |   |                                                                                                                                                                                     |
|-----------|------------------------------|---|-------------------------------------------------------------------------------------------------------------------------------------------------------------------------------------|
| 254780879 | transmembrane                | 6 | single-TMH close to N-terminus major part periplasmic                                                                                                                               |
| 254780944 | transmembrane                | 6 | double-TM                                                                                                                                                                           |
| 254780986 | transmembrane                | 6 | double-TM                                                                                                                                                                           |
| 254780988 | transmembrane                | 6 | double-TM                                                                                                                                                                           |
| 254781013 | transmembrane                | 6 | double-TM                                                                                                                                                                           |
| 254781022 | transmembrane                | 6 | multi-TMHs                                                                                                                                                                          |
| 254781034 | transmembrane                | 6 | single-TMH close to N-terminus major part periplasmic                                                                                                                               |
| 254781075 | transmembrane                | 6 | double-TM                                                                                                                                                                           |
| 254781104 | transmembrane                | 6 | single-TMH close to N-terminus major part cytoplasmic                                                                                                                               |
| 254781109 | transmembrane                | 6 | multi-TMHs                                                                                                                                                                          |
| 254781163 | transmembrane                | 6 | double-TM                                                                                                                                                                           |
| 254781199 | transmembrane                | 6 | double-TM                                                                                                                                                                           |
| peg_1140  | transmembrane                | 6 | single-TMH close to C-terminus major part cytoplasmic                                                                                                                               |
| 254781224 | transmembrane                | 6 | single-TMH close to C-terminus major part cytoplasmic                                                                                                                               |
| 254780338 | transmembrane                | 6 | 1. structure prediction;<br>2. double-TM according to structure model                                                                                                               |
| 254780356 | transmembrane                | 6 | multi-TMHs                                                                                                                                                                          |
| 254780357 | transmembrane                | 6 | multi-TMHs                                                                                                                                                                          |
| 254780565 | transmembrane                | 6 | single-TMH close to C-terminus major part cytoplasmic                                                                                                                               |
| 254780723 | transmembrane                | 6 | double-TM                                                                                                                                                                           |
| 254780401 | transmembrane                | 5 | 1. function; 2. structure prediction;<br>3. single-TMH close to N-terminus major part periplasmic                                                                                   |
| 254780474 | transmembrane                | 5 | 1. function; 2. structure prediction;<br>3. double-TM according to structure model                                                                                                  |
| 254780958 | transmembrane                | 5 | 1. function;<br>2. single-TMH close to N-terminus major part periplasmic                                                                                                            |
| 254780323 | transmembrane                | 5 |                                                                                                                                                                                     |
| 254781079 | transmembrane                | 5 |                                                                                                                                                                                     |
| 254780386 | transmembrane                | 5 |                                                                                                                                                                                     |
| 254780532 | transmembrane                | 5 |                                                                                                                                                                                     |
| 254780815 | transmembrane                | 5 |                                                                                                                                                                                     |
| 254780448 | transmembrane                | 5 | single-TMH close to N-terminus major part periplasmic                                                                                                                               |
| 254781181 | transmembrane                | 5 | single-TMH close to N-terminus major part cytoplasmic                                                                                                                               |
| 254781119 | transmembrane                | 5 | single-TMH close to C-terminus                                                                                                                                                      |
| 254781198 | transmembrane                | 5 | single-TMH close to C-terminus major part cytoplasmic                                                                                                                               |
| 254780500 | transmembrane                | 5 | single-TMH close to N-terminus major part periplasmic                                                                                                                               |
| peg_788   | transmembrane                | 4 | 1. function;<br>2. single-TMH close to N-terminus major part cytoplasmic                                                                                                            |
| 254780436 | transmembrane                | 4 |                                                                                                                                                                                     |
| 254780450 | transmembrane                | 3 |                                                                                                                                                                                     |
| peg_804   | periplasmic or extracellular | 4 | signal peptide                                                                                                                                                                      |
| 255764485 | outermembrane, with SP       | 5 | 1. signal peptide;<br>2. start point is wrong, should remove "MMVEYMITILFGGV<br>CFKGLANMRSLISCLKTIFWKNFFLRTL", then Phobius and<br>one mode of SignalP predict this protein with SP |
| 254780396 | extracytoplasmic, with SP    | 6 | signal peptide                                                                                                                                                                      |
| 254780747 | extracytoplasmic, with SP    | 6 | signal peptide                                                                                                                                                                      |
| 254780898 | extracytoplasmic, with SP    | 6 | signal peptide                                                                                                                                                                      |
| 254780135 | extracytoplasmic, with SP    | 6 | signal peptide                                                                                                                                                                      |
| 254781007 | extracytoplasmic, with SP    | 6 | signal peptide                                                                                                                                                                      |
| 254780929 | extracytoplasmic, with SP    | 6 | signal peptide                                                                                                                                                                      |
| 254780914 | extracytoplasmic, with SP    | 6 | signal peptide                                                                                                                                                                      |
| 254780764 | extracytoplasmic, with SP    | 6 | signal peptide                                                                                                                                                                      |
| 254780700 | extracytoplasmic, with SP    | 6 | signal peptide                                                                                                                                                                      |

|           |                           |   |                |
|-----------|---------------------------|---|----------------|
| 254780772 | extracytoplasmic, with SP | 6 | signal peptide |
| 254781112 | extracytoplasmic, with SP | 6 | signal peptide |
| 254781174 | extracytoplasmic, with SP | 6 | signal peptide |
| 254781207 | extracytoplasmic, with SP | 5 | signal peptide |
| 254780548 | extracytoplasmic, with SP | 5 | signal peptide |
| 254780199 | extracytoplasmic, with SP | 5 | signal peptide |
| 254780965 | extracytoplasmic, with SP | 5 | signal peptide |
| 254780959 | extracytoplasmic, with SP | 5 | signal peptide |
| 254780954 | extracytoplasmic, with SP | 5 | signal peptide |
| 254780281 | extracytoplasmic, with SP | 5 | signal peptide |
| 254780798 | extracytoplasmic, with SP | 5 | signal peptide |
| 254780728 | extracytoplasmic, with SP | 5 | signal peptide |
| 254780477 | extracytoplasmic, with SP | 5 | signal peptide |
| 254780844 | extracytoplasmic, with SP | 4 | signal peptide |
| 254780443 | extracytoplasmic, with SP | 4 | signal peptide |
| 254780308 | extracytoplasmic, with SP | 4 | signal peptide |
| 254780170 | extracytoplasmic, with SP | 4 | signal peptide |
| 254781078 | extracytoplasmic, with SP | 4 | signal peptide |
| 254781014 | extracytoplasmic, with SP | 4 | signal peptide |
| 254780935 | extracytoplasmic, with SP | 4 | signal peptide |
| 254780735 | extracytoplasmic, with SP | 4 | signal peptide |
| 254780717 | extracytoplasmic, with SP | 4 | signal peptide |
| 254780698 | extracytoplasmic, with SP | 4 | signal peptide |
| 254780350 | extracytoplasmic, with SP | 4 | signal peptide |
| 254780592 | extracytoplasmic, with SP | 4 | signal peptide |
| 254780561 | extracytoplasmic, with SP | 4 | signal peptide |
| 254781003 | extracytoplasmic, with SP | 3 | signal peptide |
| 254780951 | extracytoplasmic, with SP | 3 | signal peptide |
| 254780727 | extracytoplasmic, with SP | 3 | signal peptide |
| 254780209 | extracytoplasmic, with SP | 3 | signal peptide |
| 254781128 | extracytoplasmic, with SP | 3 | signal peptide |
| 254780435 | extracytoplasmic, with SP | 3 | signal peptide |
| 254780377 | extracytoplasmic, with SP | 3 | signal peptide |
| 254780141 | extracytoplasmic, with SP | 3 | signal peptide |
| 254780745 | extracytoplasmic, with SP | 3 | signal peptide |
| 254780963 | extracytoplasmic, with SP | 3 | signal peptide |
| 254780886 | extracytoplasmic, with SP | 3 | signal peptide |
| 254780707 | extracytoplasmic, with SP | 3 | signal peptide |
| 254780930 | extracytoplasmic, with SP | 3 | signal peptide |
| 254780537 | extracytoplasmic, with SP | 2 | signal peptide |
| 254780589 | extracytoplasmic, with SP | 2 | signal peptide |
| 254780556 | extracytoplasmic, with SP | 2 | signal peptide |
| 254780547 | extracytoplasmic, with SP | 2 | signal peptide |
| 254780376 | extracytoplasmic, with SP | 2 | signal peptide |
| 254780374 | extracytoplasmic, with SP | 2 | signal peptide |
| 254780342 | extracytoplasmic, with SP | 2 | signal peptide |
| 254780395 | extracytoplasmic, with SP | 2 | signal peptide |
| 255764500 | extracytoplasmic, with SP | 2 | signal peptide |
| 254780375 | extracytoplasmic, with SP | 2 | signal peptide |
| 254780737 | extracytoplasmic, with SP | 2 | signal peptide |
| 254780635 | extracytoplasmic, with SP | 2 | signal peptide |
| 254780607 | extracytoplasmic, with SP | 2 | signal peptide |
| 254780980 | extracytoplasmic, with SP | 2 | signal peptide |

|           |                                      |   |                                                                                     |
|-----------|--------------------------------------|---|-------------------------------------------------------------------------------------|
| 254781010 | extracytoplasmic, with SP            | 2 | signal peptide                                                                      |
| 254781121 | extracytoplasmic, with SP            | 2 | signal peptide                                                                      |
| 254781156 | extracytoplasmic, with SP            | 2 | signal peptide                                                                      |
| 254781159 | extracytoplasmic, with SP            | 2 | signal peptide                                                                      |
| 254780314 | extracytoplasmic, with SP            | 1 | signal peptide                                                                      |
| 254780759 | extracytoplasmic, with SP            | 1 | signal peptide                                                                      |
| 254780598 | extracytoplasmic, with SP            | 1 | signal peptide                                                                      |
| 254780563 | extracytoplasmic, with SP            | 1 | signal peptide                                                                      |
| 254780542 | extracytoplasmic, with SP            | 1 | signal peptide                                                                      |
| 254780528 | extracytoplasmic, with SP            | 1 | signal peptide                                                                      |
| 254780906 | extracytoplasmic, with SP            | 1 | signal peptide                                                                      |
| 254780907 | extracytoplasmic, with SP            | 1 | signal peptide                                                                      |
| 254780909 | extracytoplasmic, with SP            | 1 | signal peptide                                                                      |
| 254780953 | extracytoplasmic, with SP            | 1 | signal peptide                                                                      |
| 254780981 | extracytoplasmic, with SP            | 1 | signal peptide                                                                      |
| 254781005 | extracytoplasmic, with SP            | 1 | signal peptide                                                                      |
| 254781045 | extracytoplasmic, with SP            | 1 | signal peptide                                                                      |
| 254781157 | extracytoplasmic, with SP            | 1 | signal peptide                                                                      |
| 254781221 | extracytoplasmic, with SP            | 1 | signal peptide                                                                      |
| 254780525 | extracytoplasmic, without SP         | 1 | 1. flagellar component;<br>2. do not have SP export by flagellar assembly machinery |
| 254780388 | extracytoplasmic, TM will be cleaved | 6 | periplasmic can be processed by TadV but to SP                                      |
| 254780833 | extracytoplasmic, TM will be cleaved | 6 | periplasmic can be processed by TadV but to SP                                      |
| 254780934 | extracytoplasmic, TM will be cleaved | 6 | periplasmic can be processed by TadV but to SP                                      |
| 254781110 | extracytoplasmic, TM will be cleaved | 6 | periplasmic can be processed by TadV but to SP                                      |
| 254780732 | extracytoplasmic, TM will be cleaved | 6 | periplasmic can be processed by TadV but to SP                                      |
| 254780733 | extracytoplasmic, TM will be cleaved | 6 | periplasmic can be processed by TadV but to SP                                      |
| 254780734 | extracytoplasmic, TM will be cleaved | 6 | periplasmic can be processed by TadV but to SP                                      |
| 254780736 | extracytoplasmic, TM will be cleaved | 6 | periplasmic can be processed by TadV but to SP                                      |
| 254781108 | extracytoplasmic, TM will be cleaved | 5 | periplasmic can be processed by TadV but to SP                                      |
| 254780730 | extracytoplasmic, TM will be cleaved | 5 | periplasmic can be processed by TadV but to SP                                      |
| 254780315 | cytoplasmic?                         | 2 | maybe not real protein                                                              |
| 254781134 | cytoplasmic?                         | 2 |                                                                                     |
| 254781203 | cytoplasmic?                         | 2 |                                                                                     |
| 254781097 | cytoplasmic                          | 5 | function                                                                            |
| 254780740 | cytoplasmic                          | 4 | 1. function; 2. structure prediction                                                |
| 254780901 | cytoplasmic                          | 4 | 1. function; 2. structure prediction                                                |
| 254780933 | cytoplasmic                          | 4 | 1. function; 2. structure prediction                                                |
| 254781018 | cytoplasmic                          | 4 | 1. function; 2. structure prediction                                                |
| 254780224 | cytoplasmic                          | 4 | structure prediction                                                                |
| 254781214 | cytoplasmic                          | 4 |                                                                                     |
| 254781048 | cytoplasmic                          | 3 | function                                                                            |
| 254781039 | cytoplasmic                          | 3 | function                                                                            |
| 254780227 | cytoplasmic                          | 3 | function                                                                            |

|           |             |   |                                      |
|-----------|-------------|---|--------------------------------------|
| 254780137 | cytoplasmic | 3 | 1. function; 2. structure prediction |
| 254780544 | cytoplasmic | 3 | 1. function; 2. structure prediction |
| 254780794 | cytoplasmic | 3 | 1. function; 2. structure prediction |
| 254780812 | cytoplasmic | 3 | 1. function; 2. structure prediction |
| 254780821 | cytoplasmic | 3 | 1. function; 2. structure prediction |
| 254780869 | cytoplasmic | 3 | 1. function; 2. structure prediction |
| 254781017 | cytoplasmic | 3 | 1. function; 2. structure prediction |
| 254781038 | cytoplasmic | 3 | 1. function; 2. structure prediction |
| peg_33    | cytoplasmic | 3 | 1. function; 2. structure prediction |
| 254780845 | cytoplasmic | 3 | 1. function; 2. structure prediction |
| 254780964 | cytoplasmic | 3 | 1. function; 2. structure prediction |
| peg_888   | cytoplasmic | 3 | 1. function; 2. structure prediction |
| 254780662 | cytoplasmic | 3 | pfam                                 |
| 254780446 | cytoplasmic | 3 |                                      |
| 254780449 | cytoplasmic | 3 |                                      |
| 254780546 | cytoplasmic | 3 | structure prediction                 |
| 254780994 | cytoplasmic | 3 |                                      |
| 254781001 | cytoplasmic | 3 |                                      |
| 254781024 | cytoplasmic | 3 | structure prediction                 |
| 254781083 | cytoplasmic | 3 |                                      |
| 254780840 | cytoplasmic | 3 |                                      |
| 254780861 | cytoplasmic | 3 | structure prediction??               |
| 254780195 | cytoplasmic | 2 | function                             |
| 254780439 | cytoplasmic | 2 | function                             |
| 254780920 | cytoplasmic | 2 | function                             |
| 254781031 | cytoplasmic | 2 | function                             |
| 254780282 | cytoplasmic | 2 | 1. function; 2. structure prediction |
| 254780420 | cytoplasmic | 2 | 1. function; 2. structure prediction |
| 254780465 | cytoplasmic | 2 | 1. function; 2. structure prediction |
| 254780488 | cytoplasmic | 2 | 1. function; 2. structure prediction |
| 254780497 | cytoplasmic | 2 | 1. function; 2. structure prediction |
| 254780503 | cytoplasmic | 2 | 1. function; 2. structure prediction |
| 254780535 | cytoplasmic | 2 | 1. function; 2. structure prediction |
| 254780655 | cytoplasmic | 2 | 1. function; 2. structure prediction |
| 254780673 | cytoplasmic | 2 | 1. function; 2. structure prediction |
| 254780718 | cytoplasmic | 2 | 1. function; 2. structure prediction |
| 254780743 | cytoplasmic | 2 | function                             |
| 254781000 | cytoplasmic | 2 | 1. function; 2. structure prediction |
| 254781004 | cytoplasmic | 2 | 1. function; 2. structure prediction |
| 254780129 | cytoplasmic | 2 | 1. function; 2. structure prediction |
| peg_34    | cytoplasmic | 2 | 1. function; 2. structure prediction |
| 254780156 | cytoplasmic | 2 | 1. function; 2. structure prediction |
| 254780157 | cytoplasmic | 2 | 1. function; 2. structure prediction |
| 254780186 | cytoplasmic | 2 | 1. function; 2. structure prediction |
| 254780215 | cytoplasmic | 2 | 1. function; 2. structure prediction |
| 254780258 | cytoplasmic | 2 | 1. function; 2. structure prediction |
| 254780270 | cytoplasmic | 2 | 1. function; 2. structure prediction |
| 254780272 | cytoplasmic | 2 | 1. function; 2. structure prediction |
| 254780280 | cytoplasmic | 2 | 1. function; 2. structure prediction |
| 254780283 | cytoplasmic | 2 | 1. function; 2. structure prediction |
| 254780290 | cytoplasmic | 2 | 1. function; 2. structure prediction |
| 255764462 | cytoplasmic | 2 | 1. function; 2. structure prediction |
| 254780316 | cytoplasmic | 2 | 1. function; 2. structure prediction |





|           |             |   |                                      |
|-----------|-------------|---|--------------------------------------|
| 255764515 | cytoplasmic | 2 | 1. function; 2. structure prediction |
| 254780858 | cytoplasmic | 2 | structure prediction                 |
| 254780883 | cytoplasmic | 2 |                                      |
| 254780998 | cytoplasmic | 2 | structure prediction                 |
| 254781096 | cytoplasmic | 2 | structure prediction                 |
| 254780855 | cytoplasmic | 2 | structure prediction                 |
| 254780139 | cytoplasmic | 1 | 1. function; 2. structure prediction |
| 254780242 | cytoplasmic | 1 | 1. function; 2. structure prediction |
| 254780273 | cytoplasmic | 1 | 1. function; 2. structure prediction |
| 254780328 | cytoplasmic | 1 | 1. function; 2. structure prediction |
| 254780337 | cytoplasmic | 1 | 1. function; 2. structure prediction |
| 254780404 | cytoplasmic | 1 | 1. function; 2. structure prediction |
| 254780526 | cytoplasmic | 1 | 1. function; 2. structure prediction |
| 254780538 | cytoplasmic | 1 | 1. function; 2. structure prediction |
| 254780921 | cytoplasmic | 1 | 1. function; 2. structure prediction |
| 254781062 | cytoplasmic | 1 | 1. function; 2. structure prediction |
| 254781091 | cytoplasmic | 1 | 1. function; 2. structure prediction |
| 255764513 | cytoplasmic | 1 | 1. function; 2. structure prediction |
| 254780413 | cytoplasmic | 1 | structure prediction                 |
| 254780915 | cytoplasmic | 1 | structure prediction                 |
| 254780130 | cytoplasmic | 1 |                                      |
| 254780143 | cytoplasmic | 1 |                                      |
| 254780144 | cytoplasmic | 1 |                                      |
| 254780145 | cytoplasmic | 1 |                                      |
| 254780147 | cytoplasmic | 1 |                                      |
| 254780151 | cytoplasmic | 1 |                                      |
| 254780153 | cytoplasmic | 1 |                                      |
| 254780158 | cytoplasmic | 1 |                                      |
| 254780163 | cytoplasmic | 1 |                                      |
| 254780166 | cytoplasmic | 1 |                                      |
| 254780168 | cytoplasmic | 1 |                                      |
| 254780180 | cytoplasmic | 1 |                                      |
| 254780182 | cytoplasmic | 1 |                                      |
| 254780184 | cytoplasmic | 1 |                                      |
| 254780191 | cytoplasmic | 1 |                                      |
| 254780201 | cytoplasmic | 1 |                                      |
| 254780217 | cytoplasmic | 1 |                                      |
| 254780233 | cytoplasmic | 1 |                                      |
| 254780234 | cytoplasmic | 1 |                                      |
| 254780238 | cytoplasmic | 1 |                                      |
| 254780259 | cytoplasmic | 1 |                                      |
| 254780261 | cytoplasmic | 1 |                                      |
| 254780264 | cytoplasmic | 1 |                                      |
| 254780267 | cytoplasmic | 1 |                                      |
| 254780269 | cytoplasmic | 1 |                                      |
| 254780271 | cytoplasmic | 1 |                                      |
| 254780274 | cytoplasmic | 1 |                                      |
| 254780279 | cytoplasmic | 1 |                                      |
| 254780293 | cytoplasmic | 1 |                                      |
| 254780297 | cytoplasmic | 1 |                                      |
| 254780299 | cytoplasmic | 1 |                                      |
| 254780301 | cytoplasmic | 1 |                                      |
| 254780309 | cytoplasmic | 1 |                                      |

|           |             |   |  |
|-----------|-------------|---|--|
| 254780310 | cytoplasmic | 1 |  |
| 254780322 | cytoplasmic | 1 |  |
| 254780326 | cytoplasmic | 1 |  |
| 254780327 | cytoplasmic | 1 |  |
| 254780329 | cytoplasmic | 1 |  |
| 254780336 | cytoplasmic | 1 |  |
| 254780339 | cytoplasmic | 1 |  |
| 254780345 | cytoplasmic | 1 |  |
| 254780353 | cytoplasmic | 1 |  |
| 254780363 | cytoplasmic | 1 |  |
| 254780364 | cytoplasmic | 1 |  |
| 254780365 | cytoplasmic | 1 |  |
| 254780370 | cytoplasmic | 1 |  |
| 254780406 | cytoplasmic | 1 |  |
| 254780409 | cytoplasmic | 1 |  |
| 254780410 | cytoplasmic | 1 |  |
| 254780418 | cytoplasmic | 1 |  |
| 254780430 | cytoplasmic | 1 |  |
| 254780432 | cytoplasmic | 1 |  |
| 254780434 | cytoplasmic | 1 |  |
| 254780457 | cytoplasmic | 1 |  |
| 254780460 | cytoplasmic | 1 |  |
| 254780462 | cytoplasmic | 1 |  |
| 254780478 | cytoplasmic | 1 |  |
| 254780480 | cytoplasmic | 1 |  |
| peg_394   | cytoplasmic | 1 |  |
| 254780828 | cytoplasmic | 1 |  |
| 254780826 | cytoplasmic | 1 |  |
| 254780823 | cytoplasmic | 1 |  |
| peg_409   | cytoplasmic | 1 |  |
| 254780809 | cytoplasmic | 1 |  |
| 254780806 | cytoplasmic | 1 |  |
| 254780804 | cytoplasmic | 1 |  |
| 254780802 | cytoplasmic | 1 |  |
| 255764478 | cytoplasmic | 1 |  |
| 254780784 | cytoplasmic | 1 |  |
| 254780778 | cytoplasmic | 1 |  |
| 254780777 | cytoplasmic | 1 |  |
| 254780775 | cytoplasmic | 1 |  |
| 255764481 | cytoplasmic | 1 |  |
| 254780768 | cytoplasmic | 1 |  |
| 254780755 | cytoplasmic | 1 |  |
| 254780754 | cytoplasmic | 1 |  |
| 254780750 | cytoplasmic | 1 |  |
| 254780742 | cytoplasmic | 1 |  |
| 254780725 | cytoplasmic | 1 |  |
| 254780716 | cytoplasmic | 1 |  |
| 254780715 | cytoplasmic | 1 |  |
| 254780710 | cytoplasmic | 1 |  |
| 254780709 | cytoplasmic | 1 |  |
| 254780689 | cytoplasmic | 1 |  |
| 254780682 | cytoplasmic | 1 |  |
| 254780676 | cytoplasmic | 1 |  |

|           |             |   |  |
|-----------|-------------|---|--|
| 254780675 | cytoplasmic | 1 |  |
| 254780674 | cytoplasmic | 1 |  |
| 254780669 | cytoplasmic | 1 |  |
| 254780644 | cytoplasmic | 1 |  |
| 254780630 | cytoplasmic | 1 |  |
| 254780629 | cytoplasmic | 1 |  |
| 254780625 | cytoplasmic | 1 |  |
| 254780622 | cytoplasmic | 1 |  |
| 254780618 | cytoplasmic | 1 |  |
| 254780616 | cytoplasmic | 1 |  |
| 254780613 | cytoplasmic | 1 |  |
| 254780610 | cytoplasmic | 1 |  |
| 254780601 | cytoplasmic | 1 |  |
| 255764496 | cytoplasmic | 1 |  |
| 254780596 | cytoplasmic | 1 |  |
| 254780591 | cytoplasmic | 1 |  |
| 254780582 | cytoplasmic | 1 |  |
| 254780559 | cytoplasmic | 1 |  |
| 254780554 | cytoplasmic | 1 |  |
| 254780553 | cytoplasmic | 1 |  |
| 254780536 | cytoplasmic | 1 |  |
| 254780533 | cytoplasmic | 1 |  |
| 254780506 | cytoplasmic | 1 |  |
| 254780505 | cytoplasmic | 1 |  |
| 254780502 | cytoplasmic | 1 |  |
| peg_753   | cytoplasmic | 1 |  |
| 255764505 | cytoplasmic | 1 |  |
| 254780871 | cytoplasmic | 1 |  |
| peg_817   | cytoplasmic | 1 |  |
| 254780902 | cytoplasmic | 1 |  |
| 254780904 | cytoplasmic | 1 |  |
| 254780905 | cytoplasmic | 1 |  |
| 254780918 | cytoplasmic | 1 |  |
| 254780936 | cytoplasmic | 1 |  |
| 254780940 | cytoplasmic | 1 |  |
| 254780945 | cytoplasmic | 1 |  |
| 254780947 | cytoplasmic | 1 |  |
| 254780948 | cytoplasmic | 1 |  |
| 254780949 | cytoplasmic | 1 |  |
| peg_887   | cytoplasmic | 1 |  |
| 254780970 | cytoplasmic | 1 |  |
| 254780971 | cytoplasmic | 1 |  |
| 254780976 | cytoplasmic | 1 |  |
| 254780978 | cytoplasmic | 1 |  |
| 254780991 | cytoplasmic | 1 |  |
| 254781012 | cytoplasmic | 1 |  |
| 254781016 | cytoplasmic | 1 |  |
| 254781020 | cytoplasmic | 1 |  |
| 254781028 | cytoplasmic | 1 |  |
| 254781040 | cytoplasmic | 1 |  |
| 254781049 | cytoplasmic | 1 |  |
| 254781050 | cytoplasmic | 1 |  |
| 254781052 | cytoplasmic | 1 |  |

|           |             |   |  |
|-----------|-------------|---|--|
| 254781054 | cytoplasmic | 1 |  |
| 254781055 | cytoplasmic | 1 |  |
| 254781060 | cytoplasmic | 1 |  |
| 254781071 | cytoplasmic | 1 |  |
| 254781076 | cytoplasmic | 1 |  |
| 254781077 | cytoplasmic | 1 |  |
| 254781089 | cytoplasmic | 1 |  |
| 254781093 | cytoplasmic | 1 |  |
| 254781095 | cytoplasmic | 1 |  |
| 254781106 | cytoplasmic | 1 |  |
| 254781107 | cytoplasmic | 1 |  |
| 254781111 | cytoplasmic | 1 |  |
| 254781149 | cytoplasmic | 1 |  |
| peg_1087  | cytoplasmic | 1 |  |
| 254781177 | cytoplasmic | 1 |  |
| 254781187 | cytoplasmic | 1 |  |
| 254781202 | cytoplasmic | 1 |  |
| 254781206 | cytoplasmic | 1 |  |
| 254781208 | cytoplasmic | 1 |  |
| 254781215 | cytoplasmic | 1 |  |

N: number of methods (out of 6) that predict the protein to have transmembrane helix (helices)

SP: signal peptide

TMH: transmembrane helix

Cell color:

Light blue: transmembrane proteins that are located in the inner membrane of this Gram-negative bacterium.

Light green: proteins with signal peptides and they are likely function in the extracytoplasmic space;

Yellow: extracytoplasmic proteins that are without signal peptides and that are secreted in Sec-independent pathways;

Pink: cytoplasmic proteins
