# Supplementary material for: Predictive Sequence Analysis of the Candidatus Liberibacter asiaticus Proteome
Source: PubMed Central journal article supplement (PMC3399792; doi:10.1371/journal.pone.0041071), 2012-07-18
Supplement: pone.0041071.s004.pdf [file pone.0041071.s004.pdf]

Table S4. Percentage of duplicated genes in the proteomes with similar size to *C. L. asiaticus*

| <b>species name</b>                                    | <b>proteome size</b> | <b>percentage of duplicated genes</b> |
|--------------------------------------------------------|----------------------|---------------------------------------|
| <b>Orientia tsutsugamushi str. Boryong</b>             | 1182                 | 50.931                                |
| <b>Mycoplasma mycoides subsp. mycoides SC str.</b>     | 1095                 | 48.676                                |
| <b>Mycoplasma mycoides subsp. mycoides SC str. PG1</b> | 1016                 | 45.768                                |
| <b>Lactobacillus fermentum CECT 5716</b>               | 1051                 | 45.576                                |
| <b>Burkholderia vietnamiensis G4</b>                   | 1114                 | 44.075                                |
| <b>Mycoplasma penetrans HF-2</b>                       | 1037                 | 40.405                                |
| <b>Wolbachia sp. wRi</b>                               | 1150                 | 39.391                                |
| <b>Brucella microti CCM 4915</b>                       | 1167                 | 36.675                                |
| <b>Wolbachia endosymbiont of Drosophila</b>            | 1195                 | 34.895                                |
| <b>Vibrio cholerae O395</b>                            | 1133                 | 32.304                                |
| <b>Candidatus Liberibacter solanacearum CLso-ZC1</b>   | 1192                 | 31.208                                |
| <b>Bartonella quintana str. Toulouse</b>               | 1142                 | 26.620                                |
| <b>cyanobacterium UCYN-A</b>                           | 1199                 | 26.439                                |
| <b>Chlamydophila pneumoniae J138</b>                   | 1069                 | 26.099                                |
| <b>Lawsonia intracellularis PHE/MN1-00</b>             | 1185                 | 25.907                                |
| <b>Chlamydophila pneumoniae CWL029</b>                 | 1052                 | 25.665                                |
| <b>Chlamydophila pneumoniae TW-183</b>                 | 1113                 | 24.618                                |
| <b>Chlamydophila pneumoniae LPCoLN</b>                 | 1097                 | 24.521                                |
| <b>Chlamydophila pneumoniae AR39</b>                   | 1110                 | 24.234                                |
| <b>Chlamydophila felis Fe/C-56</b>                     | 1005                 | 23.184                                |
| <b>Ehrlichia chaffeensis str. Arkansas</b>             | 1105                 | 23.167                                |
| <b>Treponema pallidum subsp. pallidum str. Nichols</b> | 1031                 | 22.599                                |
| <b>Candidatus Liberibacter asiaticus str. psy62</b>    | 1109                 | 22.092                                |
| <b>Treponema pallidum subsp. pallidum SS14</b>         | 1028                 | 22.082                                |
| <b>Rickettsia africae ESF-5</b>                        | 1030                 | 21.553                                |
| <b>Rickettsia canadensis str. McKiel</b>               | 1093                 | 16.926                                |
