# Supplementary material for: Predictive Sequence Analysis of the Candidatus Liberibacter asiaticus Proteome
Source: PubMed Central journal article supplement (PMC3399792; doi:10.1371/journal.pone.0041071), 2012-07-18
Supplement: pone.0041071.s005.pdf [file pone.0041071.s005.pdf]

Table S5. Homologous groups in *Ca. L. asiaticus* proteome

| Homologous group1: ABC-type ATPase                         |                                                               |                                              |
|------------------------------------------------------------|---------------------------------------------------------------|----------------------------------------------|
| 254780139                                                  | ABC transporter ATPase protein                                |                                              |
| 254780173                                                  | ABC transporter ATPase protein                                |                                              |
| 254780193                                                  | ABC transporter ATPase protein and transmembrane protein      |                                              |
| 254780273                                                  | ABC transporter ATPase homolog                                | Likely function as transcriptional regulator |
| 254780340                                                  | ABC transporter ATPase protein                                |                                              |
| 255764467                                                  | ABC transporter ATPase protein and transmembrane protein      | Function in type I secretion                 |
| 254780538                                                  | ABC transporter ATPase protein                                |                                              |
| 254780559                                                  | ABC transporter ATPase protein                                |                                              |
| 254780576                                                  | ABC transporter ATPase protein and transmembrane protein      |                                              |
| 254780596                                                  | ABC transporter ATPase protein                                |                                              |
| 254780704                                                  | ABC transporter ATPase protein                                |                                              |
| 254780718                                                  | ABC transporter ATPase protein                                |                                              |
| 254780744                                                  | ABC transporter ATPase protein                                |                                              |
| 254780871                                                  | ABC transporter ATPase protein                                |                                              |
| 254780917                                                  | ABC transporter ATPase protein and transmembrane protein      |                                              |
| 254781060                                                  | SufC, ABC transporter ATPase homolog                          | Involve in Fe-S cluster assembly             |
| 254781123                                                  | ABC transporter ATPase homolog                                | Likely function as transcriptional regulator |
| Homologous group 2: GTP-binding protein                    |                                                               |                                              |
| 254780150                                                  | translation elongation factor Tu                              |                                              |
| 254780233                                                  | GTP-binding protein                                           |                                              |
| 254780263                                                  | translation elongation factor Tu                              |                                              |
| 254780264                                                  | elongation factor G                                           |                                              |
| 254780321                                                  | GTP-binding protein LepA                                      |                                              |
| 254780787                                                  | translation initiation factor IF-2                            |                                              |
| Homologous group 3: pilin component                        |                                                               |                                              |
| 254780736                                                  | Flp/Fap pilin component                                       |                                              |
| 254780735                                                  | Flp/Fap pilin component                                       |                                              |
| 254780734                                                  | Flp/Fap pilin component                                       |                                              |
| 254780733                                                  | Flp/Fap pilin component                                       |                                              |
| 254780732                                                  | Flp/Fap pilin component                                       |                                              |
| 254780730                                                  | Flp/Fap pilin component                                       |                                              |
| Homologous group 4: two component sensor, histidine kinase |                                                               |                                              |
| 254780312                                                  | two-component sensor histidine kinase protein                 |                                              |
| 254780413                                                  | two-component sensor histidine kinase protein                 |                                              |
| 254780450                                                  | two-component sensor histidine kinase protein                 |                                              |
| 255764476                                                  | two-component sensor histidine kinase protein                 |                                              |
| 254780701                                                  | two-component sensor histidine kinase protein                 |                                              |
| 254780903                                                  | two-component sensor histidine kinase protein                 |                                              |
| Homologous group 5: helicase                               |                                                               |                                              |
| 254780382                                                  | ATP dependent RNA helicase protein                            |                                              |
| 254780619                                                  | primosome assembly protein PriA, has 3'-5' helicase activity  |                                              |
| 254780601                                                  | ATP-dependent RNA helicase protein                            |                                              |
| 254780945                                                  | ATP-dependent DNA helicase RecG                               |                                              |
| 254780947                                                  | transcription-repair coupling factor, superfamily II helicase |                                              |
| Homologous group 6: Amino-acid-tRNA sythetase              |                                                               |                                              |
| 254780445                                                  | isoleucyl-tRNA synthetase                                     |                                              |
| 254780802                                                  | leucyl-tRNA synthetase                                        |                                              |
| 254780933                                                  | valyl-tRNA synthetase                                         |                                              |
| 255764461                                                  | methionyl-tRNA synthetase                                     |                                              |
| Homologous group 7: oxidoreductase                         |                                                               |                                              |
| 254780462                                                  | enoyl-(acyl carrier protein) reductase                        |                                              |
| 254780535                                                  | 3-ketoacyl-(acyl-carrier-protein) reductase                   |                                              |
| 254781166                                                  | enoyl-(acyl carrier protein) reductase                        |                                              |
| 254780337                                                  | oxidoreductase protein                                        |                                              |
| Homologous group 8: ATP synthase proteins                  |                                                               |                                              |

|                                                                              |                                                            |                                    |
|------------------------------------------------------------------------------|------------------------------------------------------------|------------------------------------|
| 254780615                                                                    | FOF1 ATP synthase subunit beta                             |                                    |
| 254780617                                                                    | FOF1 ATP synthase subunit alpha                            |                                    |
| 254780684                                                                    | flagellum-specific ATP synthase                            |                                    |
| 254780810                                                                    | transcription termination factor Rho                       | Homolog, but not the same function |
| Homologous group 9: ATP-dependent protease component                         |                                                            |                                    |
| 254780163                                                                    | ATP-dependent Clp protease ATP-binding subunit ClpA        |                                    |
| 254780271                                                                    | ATP-dependent protease ATP-binding subunit ClpX            |                                    |
| 254780829                                                                    | ATP-dependent protease ClpYQ, ATPase subunit               |                                    |
| 254780877                                                                    | ATP-dependent Clp protease ATP-binding subunit ClpA        |                                    |
| Homologous group 10: NADH dehydrogenase subunits                             |                                                            |                                    |
| 254780865                                                                    | NADH dehydrogenase subunit L                               |                                    |
| 254780866                                                                    | NADH dehydrogenase subunit M                               |                                    |
| 254780867                                                                    | NADH dehydrogenase subunit N                               |                                    |
| Homologous group 11: ABC transporter membrane spanning protein               |                                                            |                                    |
| 254780171                                                                    | ABC transporter membrane spanning protein                  |                                    |
| 254780172                                                                    | ABC transporter membrane spanning protein                  |                                    |
| 254781113                                                                    | ABC transporter membrane spanning protein                  |                                    |
| Homologous group 12: amino-acid-tRNA synthetase                              |                                                            |                                    |
| 254781118                                                                    | lysyl-tRNA synthetase                                      |                                    |
| 254781066                                                                    | Truncated, possibly inactive lysyl-tRNA synthetase protein |                                    |
| 254780419                                                                    | aspartyl-tRNA synthetase                                   |                                    |
| Homologous group 13: ABC transporter membrane spanning protein               |                                                            |                                    |
| 254780539                                                                    | ABC transporter, membrane spanning protein                 |                                    |
| 254780540                                                                    | ABC transporter, membrane spanning protein                 |                                    |
| 254780719                                                                    | zinc uptake ABC transporter, permease protein              |                                    |
| Homologous group 14: GTP-binding protein                                     |                                                            |                                    |
| 255764471                                                                    | GTP-binding protein EngA                                   |                                    |
| 254780941                                                                    | GTP-binding protein ErA                                    |                                    |
| 254780809                                                                    | tRNA modification GTPase TrmE                              |                                    |
| Homologous group 15: Pyruvate/2-oxoglutarate dehydrogenase complex component |                                                            |                                    |
| 254780673                                                                    | pyruvate dehydrogenase complex subunit                     |                                    |
| 254780674                                                                    | pyruvate dehydrogenase complex subunit                     |                                    |
| 254781052                                                                    | dihydrolipoamide succinyltransferase                       |                                    |
| Homologous group 16: Pyruvate/2-oxoglutarate dehydrogenase complex component |                                                            |                                    |
| 254781053                                                                    | dihydrolipoamide dehydrogenase                             |                                    |
| 254781055                                                                    | glutathione reductase                                      |                                    |
| 254780675                                                                    | dihydrolipoamide dehydrogenase                             |                                    |
| Homologous group 17: Lyase                                                   |                                                            |                                    |
| 254780190                                                                    | fumarate hydratase                                         |                                    |
| 254780370                                                                    | argininosuccinate lyase                                    |                                    |
| 254780974                                                                    | adenylosuccinate lyase                                     |                                    |
| Homologous group 18: flagellar components                                    |                                                            |                                    |
| 254780378                                                                    | flagellar basal body rod protein FlgG                      |                                    |
| 254780525                                                                    | flagellar hook protein FlgE                                |                                    |
| 254780685                                                                    | flagellar basal body rod protein FlgF                      |                                    |
| Homologous group 19: hydroxylase                                             |                                                            |                                    |
| 254780168                                                                    | 2-polyprenyl-6-methoxyphenyl hydroxylase                   |                                    |
| 254780842                                                                    | 2-octaprenyl-6-methoxyphenyl hydroxylase                   |                                    |
| Homologous group 20: DNA topoisomerase IV subunit A                          |                                                            |                                    |
| 254780182                                                                    | DNA topoisomerase IV subunit A                             |                                    |
| 254780353                                                                    | DNA topoisomerase IV subunit A                             |                                    |
| Homologous group 21: glutamine syntetase                                     |                                                            |                                    |
| 254780185                                                                    | glutamine synthetase                                       |                                    |
| 254780503                                                                    | glutamine synthetase                                       |                                    |
| Homologous group 22: lipopolysaccharide biosynthesis protein                 |                                                            |                                    |
| 254780201                                                                    | lipopolysaccharide biosynthesis protein                    |                                    |
| 254780923                                                                    | lipopolysaccharide biosynthesis protein                    |                                    |
| Homologous group 23: aminotransferase                                        |                                                            |                                    |

|                                                            |                                                                                            |                          |
|------------------------------------------------------------|--------------------------------------------------------------------------------------------|--------------------------|
| 254780486                                                  | 8-amino-7-oxononanoate synthase                                                            |                          |
| 254780604                                                  | 5-aminolevulinate synthase                                                                 |                          |
| Homologous group 24: enzymes in fatty acid synthesis       |                                                                                            |                          |
| 254780489                                                  | 3-oxoacyl-(acyl carrier protein) synthase II, FabH                                         |                          |
| 254780497                                                  | 3-oxoacyl-(acyl carrier protein) synthase III, FabH                                        |                          |
| Homologous group 25: transcriptional regulator             |                                                                                            |                          |
| 254780526                                                  | putative transcription regulator protein                                                   |                          |
| 254780893                                                  | transcriptional regulator                                                                  |                          |
| Homologous group 26: formyltransferase                     |                                                                                            |                          |
| 254780570                                                  | phosphoribosylglycinamide formyltransferase                                                |                          |
| 254780911                                                  | formyltetrahydrofolate deformylase                                                         |                          |
| Homologous group 27: hydrolase                             |                                                                                            |                          |
| 254780583                                                  | hydroxyacylglutathione hydrolase                                                           |                          |
| 254780758                                                  | Zn-dependent hydrolase                                                                     |                          |
| Homologous group 28: cell division protein                 |                                                                                            |                          |
| 254780606                                                  | cell division protein                                                                      |                          |
| 254780799                                                  | DNA translocase FtsK                                                                       |                          |
| Homologous group 29: RNA-pseudouridylate synthase protein  |                                                                                            |                          |
| 254780608                                                  | RNA-pseudouridylate synthase protein, ribosomal large subunit C                            |                          |
| 254780610                                                  | RNA-pseudouridylate synthase protein, ribosomal large subunit D                            |                          |
| Homologous group 30: tRNA and rRNA methylase               |                                                                                            |                          |
| 254780634                                                  | tRNA and rRNA methylase                                                                    |                          |
| 254780666                                                  | tRNA and rRNA methylase                                                                    |                          |
| Homologous group 31: transcriptional regulator             |                                                                                            |                          |
| 254780693                                                  | transcriptional regulator                                                                  |                          |
| 254780694                                                  | transcriptional regulator                                                                  |                          |
| Homologous group 32: ABC transporter transmembrane protein |                                                                                            |                          |
| 254780705                                                  | ABC transporter transmembrane protein                                                      |                          |
| 255764486                                                  | ABC transporter transmembrane protein                                                      |                          |
| Homologous group 33: signal recognition particle protein   |                                                                                            |                          |
| 254780709                                                  | signal recognition particle-docking protein                                                | Involve in cell division |
| 254780711                                                  | signal recognition particle protein                                                        |                          |
| Homologous group 34: peptide chain release factor          |                                                                                            |                          |
| 254780753                                                  | peptide chain release factor 2                                                             |                          |
| 254780874                                                  | peptide chain release factor 1                                                             |                          |
| Homologous group 35: Polyprenyl synthetase                 |                                                                                            |                          |
| 254780755                                                  | octaprenyl-diphosphate synthase protein                                                    |                          |
| 254781111                                                  | geranyltranstransferase protein                                                            |                          |
| Homologous group 36: acyltransferase                       |                                                                                            |                          |
| 254780771                                                  | UDP-3-O-[3-hydroxymyristoyl] glucosamine N-acyltransferase                                 |                          |
| 255764481                                                  | UDP-N-acetylglucosamine acyltransferase                                                    |                          |
| Homologous group 37: tRNA synthetase                       |                                                                                            |                          |
| 254780870                                                  | prolyl-tRNA synthetase                                                                     |                          |
| 254781004                                                  | threonyl-tRNA synthetase                                                                   |                          |
| Homologous group 38: dehydrogenase E1 subunit              |                                                                                            |                          |
| 254781051                                                  | 2-oxoglutarate dehydrogenase, E1 subunit                                                   |                          |
| 255764490                                                  | pyruvate dehydrogenase, E1 subunit                                                         |                          |
| Homologous group 39: iron-sulfur cluster assembly protein  |                                                                                            |                          |
| 254781059                                                  | iron-sulfur cluster assembly protein, sufB                                                 |                          |
| 254781061                                                  | iron-sulfur cluster assembly protein, sufD                                                 |                          |
| Homologous group 40: desulfurase                           |                                                                                            |                          |
| 254781062                                                  | selenocysteine lyse/cysteine desulfurase                                                   |                          |
| 254781091                                                  | cystein desulfurase                                                                        |                          |
| Homologous group 41: enzymes in Peptidoglycan Biosynthesis |                                                                                            |                          |
| 254781101                                                  | UDP-N-acetylmuramoylalanyl-D-glutamyl-2, 6-diaminopimelate--D-alanyl-D-alanyl ligase, murF |                          |
| 254781102                                                  | UDP-N-acetylmuramoylalanyl-D-glutamate--2,6-diaminopimelate                                |                          |

|                                                                |                                                                  |                                  |
|----------------------------------------------------------------|------------------------------------------------------------------|----------------------------------|
|                                                                | ligase, murE                                                     |                                  |
| Homologous group 42: ribonuclease                              |                                                                  |                                  |
| 254780630                                                      | ribonuclease PH                                                  | share one domain with 254780784  |
| 254780784                                                      | polynucleotide phosphorylase/polyadenylase                       | share one domain with 254780630  |
| Homologous group 43: ABC-transporter substrate binding protein |                                                                  |                                  |
| 254780537                                                      | ABC-transporter substrate-binding protein                        |                                  |
| 254780717                                                      | ABC-transporter substrate-binding protein                        |                                  |
| Homologous group 44: mutase                                    |                                                                  |                                  |
| 254780544                                                      | phosphoglucosamine mutase                                        |                                  |
| 254781107                                                      | phosphoglucomutase                                               |                                  |
| Homologous group 45: DNA topoisomerase IV subunit B            |                                                                  |                                  |
| 254780222                                                      | DNA topoisomerase IV subunit B                                   |                                  |
| 254780814                                                      | DNA topoisomerase IV subunit B                                   |                                  |
| Homologous group 46: GTPase                                    |                                                                  |                                  |
| 254780226                                                      | translation-associated GTPase                                    |                                  |
| 254780648                                                      | GTPase ObgE involve in DNA replication                           |                                  |
| Homologous group 47: proteins with ATP grasp domain.           |                                                                  |                                  |
| 254780268                                                      | acetyl-CoA carboxylase biotin carboxylase subunit                |                                  |
| 254780439                                                      | carbamoyl phosphate synthase large subunit                       |                                  |
| Homologous group 48: iron-sulfur cluster assembly protein      |                                                                  |                                  |
| 254780287                                                      | iron-sulfur cluster assembly accessory protein                   |                                  |
| 254781064                                                      | FeS assembly scaffold SufA                                       |                                  |
| Homologous group 49: RNA polymerase sigma factor               |                                                                  |                                  |
| 254780289                                                      | RNA polymerase sigma factor RpoD                                 |                                  |
| 254780611                                                      | RNA polymerase factor sigma-32                                   |                                  |
| Homologous group 50: carbamoyltransferase                      |                                                                  |                                  |
| 254780300                                                      | aspartate carbamoyltransferase catalytic subunit                 |                                  |
| 255764473                                                      | ornithine carbamoyltransferase                                   |                                  |
| Homologous group 51: NAD-dependent epimerase/dehydratase       |                                                                  |                                  |
| 254780328                                                      | UDP-glucose 4-epimerase                                          |                                  |
| 254780920                                                      | dTDP-glucose 4,6-dehydratase                                     |                                  |
| Homologous group 52: replicative DNA helicase                  |                                                                  |                                  |
| 254780332                                                      | replicative DNA helicase                                         |                                  |
| 254781149                                                      | putative replicative DNA helicase                                | shorter than homologour proteins |
| Homologous group 53: amido/amino-transferase                   |                                                                  |                                  |
| 254780336                                                      | amidophosphoribosyltransferase                                   |                                  |
| 254780943                                                      | glucosamine--fructose-6-phosphate aminotransferase               |                                  |
| Homologous group 54: glucose-1-phosphate NTP_transferase       |                                                                  |                                  |
| 254780365                                                      | UTP-glucose-1-phosphate uridylyltransferase protein              |                                  |
| 254780922                                                      | glucose-1-phosphate thymidylyltransferase                        |                                  |
| Homologous group 55: base excision repair protein              |                                                                  |                                  |
| 254780383                                                      | endonuclease III                                                 |                                  |
| 254780479                                                      | A/G-specific adenine glycosylase                                 |                                  |
| Homologous group 56: transporter                               |                                                                  |                                  |
| 254780387                                                      | C4-dicarboxylate transporter                                     |                                  |
| 254781171                                                      | transporter                                                      |                                  |
| Homologous group 57: fatty acid synthesis protein              |                                                                  |                                  |
| 254780461                                                      | 3-oxoacyl-(acyl carrier protein) synthase I, FabB                |                                  |
| 254780533                                                      | 3-oxoacyl-(acyl carrier protein) synthase II, FabF               |                                  |
| Homologous group 58: transaminase                              |                                                                  |                                  |
| 254780432                                                      | acetylornithine transaminase protein                             |                                  |
| 254780488                                                      | adenosylmethionine--8-amino-7-oxononanoate transaminase          |                                  |
| Homologous group 59: D-alanyl-D-alanine carboxypeptidase       |                                                                  |                                  |
| 254780435                                                      | D-alanyl-D-alanine carboxypeptidase 1                            |                                  |
| 254780698                                                      | D-alanyl-D-alanine carboxypeptidase 1 penicillin-binding protein |                                  |
| Homologous group 60: unknown                                   |                                                                  |                                  |
| 254780448                                                      | unknown                                                          |                                  |

|                                                                        |                                                        |                                                                                                                                                                                                                                                                    |
|------------------------------------------------------------------------|--------------------------------------------------------|--------------------------------------------------------------------------------------------------------------------------------------------------------------------------------------------------------------------------------------------------------------------|
| 254780449                                                              | unknown                                                |                                                                                                                                                                                                                                                                    |
| Homologous group 61: GGDEF domain containing protein                   |                                                        |                                                                                                                                                                                                                                                                    |
| 254780468                                                              | sensory box/GGDEF family protein                       |                                                                                                                                                                                                                                                                    |
| 254781079                                                              | GGDEF domain containing protein or diguanylate cyclase |                                                                                                                                                                                                                                                                    |
| Homologous group 62: ferredoxin-NADP+ reductase                        |                                                        |                                                                                                                                                                                                                                                                    |
| 254780363                                                              | ferredoxin-NADP+ reductase protein                     |                                                                                                                                                                                                                                                                    |
| 254780364                                                              | ferredoxin-NADP+ reductase protein                     |                                                                                                                                                                                                                                                                    |
| Homologous group 63: unknown                                           |                                                        |                                                                                                                                                                                                                                                                    |
| 254780122                                                              | unknown                                                | likely to be from the integrated SC1 prophage                                                                                                                                                                                                                      |
| 254781220                                                              | unknown                                                | likely to be from the integrated SC1 prophage                                                                                                                                                                                                                      |
| Homologous group 64: unknown                                           |                                                        |                                                                                                                                                                                                                                                                    |
| 254780124                                                              | unknown                                                | likely to be from the integrated SC1 prophage                                                                                                                                                                                                                      |
| 254781191                                                              | unknown                                                |                                                                                                                                                                                                                                                                    |
| Homologous group 65: prophage antirepressor                            |                                                        |                                                                                                                                                                                                                                                                    |
| 254780125                                                              | prophage antirepressor                                 | likely to be from the integrated SC1 prophage                                                                                                                                                                                                                      |
| 254780555                                                              | unknown                                                | aligned to piece of 254780125                                                                                                                                                                                                                                      |
| 254780987                                                              | prophage antirepressor                                 |                                                                                                                                                                                                                                                                    |
| Homologous group 66: DNA-binding protein                               |                                                        |                                                                                                                                                                                                                                                                    |
| 254780126                                                              | phage protein, may related to DNA binding              | likely to be from the integrated SC1 prophage                                                                                                                                                                                                                      |
| 254781192                                                              | single-strand DNA binding protein                      |                                                                                                                                                                                                                                                                    |
| Homologous group 67: prophage DNA polymerase                           |                                                        |                                                                                                                                                                                                                                                                    |
| 254780127                                                              | prophage DNA polymerase                                | likely to be from the integrated SC1 prophage                                                                                                                                                                                                                      |
| 254781193                                                              | prophage DNA polymerase                                |                                                                                                                                                                                                                                                                    |
| Homologous group 68: restriction endonuclease                          |                                                        |                                                                                                                                                                                                                                                                    |
| 254780128                                                              | restriction endonuclease                               | likely to be from the integrated SC1 prophage                                                                                                                                                                                                                      |
| 254781194                                                              | restriction endonuclease                               |                                                                                                                                                                                                                                                                    |
| Homologous group 69: SNF2 family DNA/RNA helicase                      |                                                        |                                                                                                                                                                                                                                                                    |
| 254780129 +<br>254780130                                               | SNF2 family DNA/RNA<br>helicases                       | (1)They are the boundary of the integrated prophage and 254780129 is likely to belong to the prophage. (2)Two neighbouring proteins both aligned to part of 255764515. They may function independently or cooperatively. It is also possible they are pseudogenes. |
| 255764515                                                              | DNA/RNA helicases, SNF2<br>family                      | It is the boundary of the integrated prophage, the C-terminus half of the protein is likely to be belong to the prophage                                                                                                                                           |
| Homologous group 70: NAD-dependant DNA ligase                          |                                                        |                                                                                                                                                                                                                                                                    |
| 254780131                                                              | NAD-dependant DNA ligase                               | aligned to one domain of 254781172, 99% identical to 254781196, near the region of integrated prophage                                                                                                                                                             |
| 254781172                                                              | NAD-dependant DNA ligase                               |                                                                                                                                                                                                                                                                    |
| 254781196                                                              | NAD-dependant DNA ligase                               | likely to be from the brophage, 99% identical to 254780131, aligned to one domain of 254781172                                                                                                                                                                     |
| Homologous group 71: Guanylate kinase                                  |                                                        |                                                                                                                                                                                                                                                                    |
| 254780132                                                              | guanylate kinase                                       | near the region of the integrated SC1 prophage                                                                                                                                                                                                                     |
| 254781197                                                              | guanylate kinase                                       | likely from the prophage, 98% identical to 254780132                                                                                                                                                                                                               |
| 255764507                                                              | guanylate kinase                                       |                                                                                                                                                                                                                                                                    |
| Homologous group 72: unknown                                           |                                                        |                                                                                                                                                                                                                                                                    |
| 254780988                                                              | unknown                                                |                                                                                                                                                                                                                                                                    |
| 254781199                                                              | unknown                                                | likely to be from the SC1 prophage                                                                                                                                                                                                                                 |
| Homologous group 73: phage terminase, large subunit                    |                                                        |                                                                                                                                                                                                                                                                    |
| 254781187                                                              | phage terminase, large subunit                         |                                                                                                                                                                                                                                                                    |
| 254781215                                                              | phage terminase, large subunit                         | likely to be from the SC1 prophage                                                                                                                                                                                                                                 |
| Homologous group 74: unknown                                           |                                                        |                                                                                                                                                                                                                                                                    |
| 254781188                                                              | unknown                                                |                                                                                                                                                                                                                                                                    |
| 254781217                                                              | unknown                                                | likely to be from the SC1 prophage                                                                                                                                                                                                                                 |
| Homologous group 75: primase                                           |                                                        |                                                                                                                                                                                                                                                                    |
| 254781190                                                              | primase-like protein                                   | only aligned to part of 254781125                                                                                                                                                                                                                                  |
| 254781225                                                              | P4 family phage/plasmid primase                        | likely to be from the SC1 prophage                                                                                                                                                                                                                                 |
| Homologous group 76: ribonucleotide-diphosphate reductase subunit beta |                                                        |                                                                                                                                                                                                                                                                    |
| 254780136                                                              | ribonucleotide-diphosphate reductase subunit beta      | 100% identical to a piece of 254780845 or 254780964, close to the region of mapped prophage                                                                                                                                                                        |

|                                                                             |                                                   |                                                                                                                                                                            |
|-----------------------------------------------------------------------------|---------------------------------------------------|----------------------------------------------------------------------------------------------------------------------------------------------------------------------------|
| 254780845                                                                   | ribonucleotide-diphosphate reductase subunit beta |                                                                                                                                                                            |
| 254780964                                                                   | ribonucleotide-diphosphate reductase subunit beta |                                                                                                                                                                            |
| 254781006                                                                   | ribonucleotide-diphosphate reductase subunit beta | 100% identical to a piece of 254780845 or 254780964                                                                                                                        |
| 254781153                                                                   | ribonucleotide-diphosphate reductase subunit beta | just a small piece of 254780845 or 254780964, 95% identity                                                                                                                 |
| Homologous group 77: unknown protein from the prophage                      |                                                   |                                                                                                                                                                            |
| 255764516                                                                   | unknown                                           | likely to be from the SC1 prophage                                                                                                                                         |
| 255764517                                                                   | unknown                                           | likely to be from the SC1 prophage                                                                                                                                         |
| Homologous group 78: GCN5-related N-acetyltransferase                       |                                                   |                                                                                                                                                                            |
| 254780989                                                                   | GCN5-related N-acetyltransferase                  |                                                                                                                                                                            |
| 254780962                                                                   | GCN5-related N-acetyltransferase                  | 64% identical to piece of 254780989                                                                                                                                        |
| 254781162                                                                   | GCN5-related N-acetyltransferase                  |                                                                                                                                                                            |
| 254781155                                                                   | GCN5-related N-acetyltransferase                  | 64% identical to piece of 254780989                                                                                                                                        |
| Homologous group 79: phage-related lysozyme                                 |                                                   |                                                                                                                                                                            |
| 254781057 +<br>254781058                                                    | phage-related lysozyme                            | neighbouring proteins both aligned to part of 254781056. They may function independently or cooperatively.<br>It is also possible they are psuedogenes                     |
| 254781056                                                                   | phage-related lysozyme                            |                                                                                                                                                                            |
| Homologous group 80: unknown proteins                                       |                                                   |                                                                                                                                                                            |
| 254780492                                                                   | Unknown                                           | 40 aa short gene, 100% identical to 254780880 and 254780830                                                                                                                |
| 254780830                                                                   | Unknown                                           | 40 aa short gene, 100% identical to 254780492 and 254780880                                                                                                                |
| 254780880                                                                   | Unknown                                           | 40 aa short gene, 100% identical to 254780492 and 254780830                                                                                                                |
| Homologous group 81: ATPase involved in chromosome partitioning             |                                                   |                                                                                                                                                                            |
| 254780491                                                                   | ATPase involved in chromosome partitioning        | 100% identical to the C-terminal domain of 254780831                                                                                                                       |
| 254780831                                                                   | ATPase involved in chromosome partitioning        |                                                                                                                                                                            |
| 254780881                                                                   | ATPase involved in chromosome partitioning        | 100% identical to the C-terminal domain of 254780831                                                                                                                       |
| Homologous group 82: site-specific tyrosine recombinase                     |                                                   |                                                                                                                                                                            |
| 254780490                                                                   | site-specific tyrosine recombinase XerC           | 90% identical to the N-terminal domain of 254780882                                                                                                                        |
| 255764498                                                                   | site-specific tyrosine recombinase XerD           |                                                                                                                                                                            |
| 254780882                                                                   | site-specific tyrosine recombinase XerC           |                                                                                                                                                                            |
| Homologous group 83: von Willebrand factor type A domain containing protein |                                                   |                                                                                                                                                                            |
| 254780388                                                                   | von Willebrand factor type A                      |                                                                                                                                                                            |
| 254780833                                                                   | von Willebrand factor type A                      |                                                                                                                                                                            |
| 254780934                                                                   | von Willebrand factor type A                      |                                                                                                                                                                            |
| 254781108                                                                   | von Willebrand factor type A                      |                                                                                                                                                                            |
| 254781110                                                                   | von Willebrand factor type A                      |                                                                                                                                                                            |
| Homologous group 84: unknown proteins                                       |                                                   |                                                                                                                                                                            |
| 254780203 +<br>254780204                                                    | unknown                                           | Two neighbouring proteins aligned to different regions of 254781189.<br>They may function independently or cooperatively.<br>It is also possible that they are psuedogenes |
| 254781124 +<br>254781125                                                    | unknown                                           | Two neighbouring proteins aligned to different regions of 254781189.<br>They may function independently or cooperatively.<br>It is also possible that they are psuedogenes |
| 254781189                                                                   | unknown                                           | Transmembrane protein, fast evolution                                                                                                                                      |
| Homologous group 85: unknown proteins                                       |                                                   |                                                                                                                                                                            |
| 254780135                                                                   | Unknown                                           | has signal peptide, fast-evolving                                                                                                                                          |
| 254781007                                                                   | Unknown                                           | has signal peptide, fast-evolving                                                                                                                                          |
| 254780914                                                                   | Unknown                                           | has signal peptide, fast-evolving                                                                                                                                          |
| 254780929                                                                   | Unknown                                           | has signal peptide, fast-evolving                                                                                                                                          |
| Homologous group 86: Endonuclease/exonuclease/phosphatase family proteins   |                                                   |                                                                                                                                                                            |
| 254780797                                                                   | Endonuclease/exonuclease/phosphatase family       |                                                                                                                                                                            |
| 254780995                                                                   | Endonuclease/exonuclease/phosphatase family       |                                                                                                                                                                            |
| 254780996                                                                   | Endonuclease/exonuclease/phosphatase family       |                                                                                                                                                                            |
| 254781003                                                                   | Endonuclease/exonuclease/phosphatase family       | has signal peptide                                                                                                                                                         |
| Homologous group 87: unknown proteins                                       |                                                   |                                                                                                                                                                            |
| 254780984                                                                   | Unknown                                           | has signal peptide, fast evolving protein                                                                                                                                  |
| 254781126                                                                   | Unknown                                           |                                                                                                                                                                            |
| 254780981                                                                   | Unknown                                           | has signal peptide, fast evolving protein                                                                                                                                  |
| Homologous group 88: CBS domain containing protein                          |                                                   |                                                                                                                                                                            |

|                             |                                               |                                                                               |
|-----------------------------|-----------------------------------------------|-------------------------------------------------------------------------------|
| 254780426                   | CBS-domain containing protein, hemolysin-like | Might be exported by Type I secretion system and function as virulence factor |
| 255764470                   | CBS-domain containing transmembrane protein   |                                                                               |
| Homologous group 89:unknown |                                               |                                                                               |
| 254780556                   | unknown                                       | has signal peptide, fast evolving protein                                     |
| 254780980                   | unknown                                       | has signal peptide, fast evolving protein                                     |
| Homologous group 90:        |                                               |                                                                               |
| 254780886                   | unknown                                       | has signal peptide, fast evolving protein                                     |
| 254781005                   | unknown                                       | has signal peptide, fast evolving protein                                     |
