# Supplementary material for: Predictive Sequence Analysis of the Candidatus Liberibacter asiaticus Proteome
Source: PubMed Central journal article supplement (PMC3399792; doi:10.1371/journal.pone.0041071), 2012-07-18
Supplement: pone.0041071.s006.pdf [file pone.0041071.s006.pdf]

Table S6: Proteins with abnormal evolutionary history

| Proteins from the integrated SC1 prophage |                                 |       |         |                                          |                                      |
|-------------------------------------------|---------------------------------|-------|---------|------------------------------------------|--------------------------------------|
| NCBI gi                                   | Organism of the closest homolog | Class | Kingdom | Function prediction                      | Comments                             |
| 255764515                                 | Liberibacter SC1 phage          |       | Viruses | DNA/RNA helicase, SNF2 family            | C-terminal half belongs to the phage |
| 254781196                                 | Liberibacter SC1 phage          |       | Viruses | NAD-dependent DNA ligase                 |                                      |
| 254781197                                 | Liberibacter SC1 phage          |       | Viruses | guanylate kinase                         | Duplication upon phage integration   |
| 254781198                                 | Liberibacter SC1 phage          |       | Viruses | unknown                                  |                                      |
| 254781199                                 | Liberibacter SC1 phage          |       | Viruses | transmembrane protein                    |                                      |
| 255764516                                 | Liberibacter SC1 phage          |       | Viruses | unknown                                  |                                      |
| 255764517                                 | Liberibacter SC1 phage          |       | Viruses | unknown                                  |                                      |
| 254781202                                 | Liberibacter SC1 phage          |       | Viruses | Structure protein of bacteriophage       | Virus protein                        |
| 254781203                                 | Liberibacter SC1 phage          |       | Viruses | unknown                                  |                                      |
| 254781204                                 | Liberibacter SC1 phage          |       | Viruses | minor structure protein                  | Virus protein                        |
| 254781205                                 | Liberibacter SC1 phage          |       | Viruses | unknown                                  |                                      |
| 254781206                                 | Liberibacter SC1 phage          |       | Viruses | unknown                                  |                                      |
| 254781207                                 | Liberibacter SC1 phage          |       | Viruses | unknown                                  |                                      |
| 254781208                                 | Liberibacter SC1 phage          |       | Viruses | unknown                                  |                                      |
| 254781209                                 | Liberibacter SC1 phage          |       | Viruses | phage related protein                    | Virus protein                        |
| 254781210                                 | Liberibacter SC1 phage          |       | Viruses | Major capsid protein                     | Virus protein                        |
| 254781211                                 | Liberibacter SC1 phage          |       | Viruses | unknown                                  |                                      |
| 254781212                                 | Liberibacter SC1 phage          |       | Viruses | unknown                                  |                                      |
| 254781213                                 | Liberibacter SC1 phage          |       | Viruses | head-to-tail joining protein, phage      | Virus protein                        |
| 254781214                                 | Liberibacter SC1 phage          |       | Viruses | unknown                                  |                                      |
| 254781215                                 | Liberibacter SC1 phage          |       | Viruses | phage terminase, large subunit           | Virus protein                        |
| 254781216                                 | Liberibacter SC1 phage          |       | Viruses | unknown                                  |                                      |
| 254781217                                 | Liberibacter SC1 phage          |       | Viruses | Phage protein related to DNA packing     | Virus protein                        |
| 254781218                                 | Liberibacter SC1 phage          |       | Viruses | transcriptional repressor                | Virus protein                        |
| 254781219                                 | Liberibacter SC1 phage          |       | Viruses | unknown                                  |                                      |
| 254781220                                 | Liberibacter SC1 phage          |       | Viruses | unknown                                  |                                      |
| 254781221                                 | Liberibacter SC1 phage          |       | Viruses | unknown                                  |                                      |
| 254781222                                 | Liberibacter SC1 phage          |       | Viruses | acyltransferase, phage related           | Virus protein                        |
| 254781223                                 | Liberibacter SC1 phage          |       | Viruses | phage associated protein                 | Virus protein                        |
| 254781224                                 | Liberibacter SC1 phage          |       | Viruses | transmembrane protein                    |                                      |
| 254781225                                 | Liberibacter SC1 phage          |       | Viruses | P4 family phage/plasmid primase          | Virus protein                        |
| 254781226                                 | Liberibacter SC1 phage          |       | Viruses | unknown                                  | From Viruses                         |
| 254781227                                 | Liberibacter SC1 phage          |       | Viruses | unknown                                  |                                      |
| 254781228                                 | Liberibacter SC1 phage          |       | Viruses | unknown                                  |                                      |
| 254780122                                 | Liberibacter SC1 phage          |       | Viruses | unknown                                  |                                      |
| 254780123                                 | Liberibacter SC1 phage          |       | Viruses | unknown                                  |                                      |
| 254780124                                 | Liberibacter SC1 phage          |       | Viruses | phage-related, probably endo/exonuclease | Virus protein                        |
| 254780125                                 | Liberibacter SC1 phage          |       | Viruses | phage antirepressoer                     | Virus protein                        |
| 254780126                                 | Liberibacter SC1 phage          |       | Viruses | single-stranded DNA-binding protein      |                                      |
| 254780127                                 | Liberibacter SC1 phage          |       | Viruses | DNA polymerase from bacteriophage        | Virus protein                        |
| 254780128                                 | Liberibacter SC1 phage          |       | Viruses | restriction endonuclease                 |                                      |

| 254780129                                                                                     | Liberibacter SC1 phage          |                        | Viruses  | DNA/RNA helicase, SNF2 family, N-terminal            |                                                                      |
|-----------------------------------------------------------------------------------------------|---------------------------------|------------------------|----------|------------------------------------------------------|----------------------------------------------------------------------|
| Liberibacter proteins with duplicated version in the integrated <i>liberibacter SC1 phage</i> |                                 |                        |          |                                                      |                                                                      |
| NCBI gi                                                                                       | Organism of the closest homolog | Class                  | Kingdom  | Function prediction                                  | Comments                                                             |
| 254780130                                                                                     | Liberibacter SC1 phage          |                        | Viruses  | DNA/RNA helicase, SNF2 family, C-terminal            | Duplicated upon phage integration                                    |
| 254780132                                                                                     | Liberibacter SC1 phage          |                        | Viruses  | guanylate kinase                                     | Duplicated upon phage integration                                    |
| Potential phage proteins                                                                      |                                 |                        |          |                                                      |                                                                      |
| NCBI gi                                                                                       | Organism of the closest homolog | Class                  | Kingdom  | Function prediction                                  | Comments                                                             |
| 254780988                                                                                     | Liberibacter SC1 phage          |                        | Viruses  | Unknown transmembrane protein                        | from another bacteriophage?                                          |
| 254781013                                                                                     | Salinibacter ruber              | Sphingobacteria        | Bacteria | phage related protein                                | from another bacteriophage?                                          |
| 254781056                                                                                     | Janthinobacterium sp. Marseille | Betaproteobacteria     | Bacteria | phage-related lysozyme                               | from another bacteriophage?                                          |
| 254781057                                                                                     | Acidobacterium sp. MP5ACTX9     | Acidobacteria          | Bacteria | phage-related protein                                | from another bacteriophage?                                          |
| 254781058                                                                                     | Janthinobacterium sp. Marseille | Betaproteobacteria     | Bacteria | phage-related lysozyme                               | from another bacteriophage?                                          |
| 254781187                                                                                     | Liberibacter SC1 phage          |                        | Viruses  | phage terminase, large subunit                       | from another bacteriophage?                                          |
| 254781186                                                                                     | Liberibacter SC2 phage          |                        | Viruses  | Phage terminase, large subunit                       | Just piece of the protein                                            |
| 254781188                                                                                     | Liberibacter SC1 phage          |                        | Viruses  | phage protein, terminase small subunit               | from another bacteriophage?                                          |
| 254781190                                                                                     | Liberibacter SC1 phage          |                        | Viruses  | primase                                              | from another bacteriophage?                                          |
| 254781191                                                                                     | Liberibacter SC1 phage          |                        | Viruses  | unknown                                              | from another bacteriophage?                                          |
| 254781192                                                                                     | Xylella fastidiosa              | Gammaproteobacteria    | Bacteria | phage-related protein                                | from another bacteriophage?                                          |
| 254781193                                                                                     | Escherichia coli                | Gammaproteobacteria    | Bacteria | DNA polymerase from bacteriophage                    | from another bacteriophage?                                          |
| 254781194                                                                                     | Liberibacter SC1 phage          |                        | Viruses  | Phage related endonuclease                           | from another bacteriophage?                                          |
| Proteins originated from bacteria out of the class <i>Alphaproteobacteria</i>                 |                                 |                        |          |                                                      |                                                                      |
| NCBI gi                                                                                       | Organism of the closest homolog | Class                  | Kingdom  | Function prediction                                  | Comments                                                             |
| 254780144                                                                                     | Anaeromyxobacter sp. Fw109-5    | Deltaproteobacteria    | Bacteria | 50S ribosomal protein L12P                           | The top one is exception Most best hits are from Alphaproteobacteria |
| 254780229                                                                                     | Thermobifida fusca              | Actinobacteria (class) | Bacteria | helicase                                             |                                                                      |
| 254780386                                                                                     | Halomonas elongate              | Gammaproteobacteria    | Bacteria | Type I secretion membrane protein                    |                                                                      |
| 254780387                                                                                     | Providencia stuartii            | Gammaproteobacteria    | Bacteria | C4-dicarboxylate transporter DctA                    |                                                                      |
| 254780446                                                                                     | Xylella fastidiosa              | Gammaproteobacteria    | Bacteria | unknown                                              |                                                                      |
| 254780735                                                                                     | Arthrobacter chlorophenolicus   | Actinobacteria (class) | Bacteria | pilin component                                      |                                                                      |
| 254780720                                                                                     | Neptuniibacter caesariensis     | Gammaproteobacteria    | Bacteria | Ferroxidase                                          |                                                                      |
| 254780661                                                                                     | Sodalis glossinidius            | Gammaproteobacteria    | Bacteria | exonuclease I                                        |                                                                      |
| 254780563                                                                                     | Micromonospora sp. ATCC 39149   | Actinobacteria (class) | Bacteria | ABC-transporter extracellular solute-binding protein | fragment, too short to have sensible blast top hits                  |
| 254780562                                                                                     | Xanthomonas oryzae              | Gammaproteobacteria    | Bacteria | unknown                                              |                                                                      |
| 254780561                                                                                     | Photorhabdus luminescens        | Gammaproteobacteria    | Bacteria | thiamine transporter substrate binding subunit       |                                                                      |
| 255764501                                                                                     | Arsenophonus nasoniae           | Gammaproteobacteria    | Bacteria | thiamine transporter membrane protein                |                                                                      |
| 254780559                                                                                     | Arsenophonus nasoniae           | Gammaproteobacteria    | Bacteria | thiamine transporter ATP-binding subunit             |                                                                      |
| 255764504                                                                                     | Neisseria lactamica             | Betaproteobacteria     | Bacteria | type II modification methyltransferase               |                                                                      |
| 254780516                                                                                     | Neisseria lactamica             | Betaproteobacteria     | Bacteria | type II modification methyltransferase               |                                                                      |
| 254780515                                                                                     | Neisseria lactamica             | Betaproteobacteria     | Bacteria | restriction enzyme                                   |                                                                      |
| 254780514                                                                                     | Flavobacterium psychrophilum    | Flavobacteria          | Bacteria | type II restriction endonuclease                     |                                                                      |
| 254780836                                                                                     | Klebsiella pneumonia            | Gammaproteobacteria    | Bacteria | type I modification DNA methylase                    |                                                                      |
| 254780837                                                                                     | Klebsiella pneumonia            | Gammaproteobacteria    | Bacteria | restriction endonuclease S subunit                   |                                                                      |
| 254780843                                                                                     | Azotobacter vinelandii          | Gammaproteobacteria    | Bacteria | glucose/galactose transporter                        |                                                                      |
| 254780845                                                                                     | Thermobifida fusca              | Actinobacteria (class) | Bacteria | ribonucleotide-diphosphate reductase subunit         | related to mobile element in the                                     |

|           |                                 |                        |          |                                                          |                                          |
|-----------|---------------------------------|------------------------|----------|----------------------------------------------------------|------------------------------------------|
|           |                                 |                        |          | beta                                                     | genome ?                                 |
| 254780918 | Methylobacter tundripaludum     | Gammaproteobacteria    | Bacteria | glycosyl transferase family protein                      |                                          |
| 255764508 | Bordetella bronchiseptica       | Betaproteobacteria     | Bacteria | unknown                                                  |                                          |
| 254780964 | Thermobifida fusca              | Actinobacteria (class) | Bacteria | ribonucleotide-diphosphate reductase subunit beta        | related to mobile element in the genome? |
| 254780982 | Photobacterium profundum        | Gammaproteobacteria    | Bacteria | homoserine lactone efflux protein                        |                                          |
| 254780987 | Pseudomonas fluorescens         | Gammaproteobacteria    | Bacteria | transcriptional regulator                                |                                          |
| 254781000 | Sodalis glossinidius            | Gammaproteobacteria    | Bacteria | tRNA (uracil-5-)-methyltransferase                       |                                          |
| 254781016 | Neptuniibacter caesariensis     | Gammaproteobacteria    | Bacteria | diphosphomevalonate decarboxylase                        |                                          |
| 254781017 | Thiomicrospira crunogena        | Gammaproteobacteria    | Bacteria | GHMP kinase                                              |                                          |
| 254781018 | Dichelobacter nodosus           | Gammaproteobacteria    | Bacteria | GHMP kinase                                              |                                          |
| 254781019 | Neptuniibacter caesariensis     | Gammaproteobacteria    | Bacteria | hydroxymethylglutaryl-coenzyme A synthase                |                                          |
| 254781020 | Neptuniibacter caesariensis     | Gammaproteobacteria    | Bacteria | isopentenyl pyrophosphate isomerase                      |                                          |
| 255764509 | Neptuniibacter caesariensis     | Gammaproteobacteria    | Bacteria | HMG-CoA reductase                                        |                                          |
| 254781022 | Sodalis glossinidius            | Gammaproteobacteria    | Bacteria | membrane protein                                         |                                          |
| 254781025 | Rhodothermus marinus            | Sphingobacteria        | Bacteria | deoxyuridine triphosphate nucleotidohydrolase            |                                          |
| 254781068 | Legionella pneumophila          | Gammaproteobacteria    | Bacteria | glycoside hydrolase family protein                       | fragment                                 |
| 254781070 | Candidatus Regiella insecticola | Gammaproteobacteria    | Bacteria | glycosyl hydrolase                                       | fragment                                 |
| 254781071 | Candidatus Hamiltonella defensa | Gammaproteobacteria    | Bacteria | glycosyl hydrolase                                       | fragment                                 |
| 254781114 | Acidovorax delafieldii          | Betaproteobacteria     | Bacteria | glycosyl transferase                                     |                                          |
| 254781147 | Xylella fastidiosa              | Gammaproteobacteria    | Bacteria | transcriptional regulator                                |                                          |
| 254781149 | Selenomonas noxia               | Negativicutes          | Bacteria | replicative DNA helicase                                 |                                          |
| 254781169 | Vibrio vulnificus               | Gammaproteobacteria    | Bacteria | sugar transporter                                        |                                          |
| 254781170 | Serratia proteamaculans         | Gammaproteobacteria    | Bacteria | deoxyribodipyrimidine photolyase                         |                                          |
| 254781171 | Legionella longbeachae          | Gammaproteobacteria    | Bacteria | Na <sup>+</sup> /H <sup>+</sup> -dicarboxylate symporter |                                          |

Proteins with close eukaryotic homologs (but they are not likely to really originated in eukaryota)

| NCBI gi   | Organism of the closest homolog | Class | Kingdom   | Function prediction                  | Comments                                            |
|-----------|---------------------------------|-------|-----------|--------------------------------------|-----------------------------------------------------|
| 254780480 | Ricinus communis                |       | Eukaryota | deoxycytidine triphosphate deaminase | only first abnormal                                 |
| 254780640 | Ricinus communis                |       | Eukaryota | Chromosome segregation ATPase        | fragment, too short to have sensible blast top hits |
| 254780519 | Gossypium hirsutum              |       | Eukaryota | flagellar biosynthesis protein FliQ  | only the top hit is abnormal                        |

Potential protein involve in the virulence effect of the pathogen

| NCBI gi   | Organism of the closest homolog  | Class               | Kingdom  | Function prediction                                 | Comments                                                           |
|-----------|----------------------------------|---------------------|----------|-----------------------------------------------------|--------------------------------------------------------------------|
| 254780898 | Thermodesulfovibrio yellowstonii | Nitrospira (class)  | Bacteria | Protein serine/tyrosine phosphatase                 | has signal peptide                                                 |
| 254780995 | Photobacterium profundum         | Gammaproteobacteria | Bacteria | Endonuclease/exonuclease/phosphatase family protein | has several similar proteins within the genome                     |
| 254781003 | Haliangium ochraceum             | Deltaproteobacteria | Bacteria | Endonuclease/exonuclease/phosphatase family protein | has signal peptide, has several similar proteins within the genome |
| 254780607 | Yersinia frederiksenii           | Gammaproteobacteria | Bacteria | unknown                                             | has signal peptide                                                 |
| 254780965 | Stenotrophomonas maltophilia     | Gammaproteobacteria | Bacteria | unknown                                             | has signal peptide                                                 |
| 254780953 | Idiomarina baltica               | Gammaproteobacteria | Bacteria | outer membrane lipoprotein                          | transmembrane protein                                              |
| 254780291 | Photorhabdus luminescens         | Gammaproteobacteria | Bacteria | unknown                                             | transmembrane protein                                              |
| 254780298 | Burkholderia sp. CCGE1001        | Betaproteobacteria  | Bacteria | unknown                                             | transmembrane protein                                              |
| 254780338 | Arsenophonus nasoniae            | Gammaproteobacteria | Bacteria | unknown                                             | transmembrane protein                                              |
| 254780449 | Buchnera aphidicola              | Gammaproteobacteria | Bacteria | unknown                                             | transmembrane protein                                              |
